# Supplementary material for: Cord blood co-methylation network mediates the association between prenatal diet and cognition at age 2 years: A birth cohort study
Source: Research Square preprint supplement (doi:10.21203/rs.3.rs-7747095/v1), 2025-10-20
Supplement: Supplementary file 1 [file 19bd20e4c0d85bda23e7e15c.xlsx]

## Sheet: Contents
Data sheet	Description
Supplementary data 1	Top 3000 CpGs from epigenome-wide association study for child's cognition raw score at 2 years using the Bayley-III assessment
Supplementary data 2	Co-methylation network (Co-MNcog1): CpGs and corresponding genes
Supplementary data 3	Top 100 transcription factors identified from the LISA analysis of the Co-MNCog1 network.
Supplementary data 4	Enrichment analysis of genes from the Co-MNCog1 network using the Gene Ontology (GO) database.
Supplementary data 5	Enrichment analysis of genes from the Co-MNCog1 network using the Reactome database.
	Nb. Genome Build is GRCh37.

## Sheet: Data_1
Data 1. Results from the EWAS on cognition, including CpG name, chromosome location, and associated gene. The table also indicates the WGCNA network assignment for each CpG site.
	CpG_Name	chr	UCSC_RefGene_Name.x	network
1	cg00125947	chr16	NLRC5	NA
2	cg24094073	chr1		NA
3	cg11131384	chr7	CNPY1	NA
4	cg27068297	chr22	IL17REL	NA
5	cg03187614	chr6	TRIM10;TRIM10	NA
6	cg26129553	chr7	OR9A4	NA
7	cg20945055	chr17	NXN	Co-MNCog1
8	cg16970850	chr8	PINX1	NA
9	cg12212774	chr19	TCF3;TCF3	NA
10	cg06195293	chr6	TRIM40	NA
11	cg05767445	chr11		NA
12	cg20846236	chr1	TXLNA	NA
13	cg12326166	chr9	FRMD3;FRMD3;FRMD3	Co-MNCog1
14	cg03552086	chr16	LMF1	NA
15	cg01651169	chr7	ARPC1A	Co-MNCog1
16	cg03251349	chr6	TRIM40	NA
17	cg05263382	chr1		NA
18	cg05107149	chr22	HMOX1	Co-MNCog1
19	cg22504285	chr12	ATP2A2;ATP2A2;ATP2A2	NA
20	cg07974890	chr2		Co-MNCog2
21	cg19423196	chr10	MAT1A;MAT1A	NA
22	cg05432604	chr20		Co-MNCog2
23	cg12007709	chr7	CRCP;CRCP;CRCP;CRCP;CRCP	Co-MNCog2
24	cg07942010	chr3	ALCAM	NA
25	cg05234269	chr3	ST3GAL6;ST3GAL6;ST3GAL6;ST3GAL6;ST3GAL6;ST3GAL6	NA
26	cg03590387	chr2		NA
27	cg22893248	chr7	ACTR3C;ACTR3C;LRRC61;LRRC61	NA
28	cg14148370	chr2	ARMC9	NA
29	cg11651936	chr2		NA
30	cg03877420	chr5		NA
31	cg27337148	chr1	CAMK1G	NA
32	cg10611310	chr10	NDST2	Co-MNCog2
33	cg06011560	chr10		NA
34	cg07599432	chr10	PDZD8	Co-MNCog1
35	cg12378592	chr1	MROH7;MROH7;MROH7;MROH7;MROH7-TTC4;MROH7-TTC4;MROH7-TTC4	Co-MNCog1
36	cg18068561	chr5	NNT;NNT	Co-MNCog2
37	cg03602119	chr20		NA
38	cg18789452	chr1	SZT2	NA
39	cg20336524	chr8		NA
40	cg10439889	chr22	GTPBP1	Co-MNCog2
41	cg14656154	chr3	B4GALT4;B4GALT4;B4GALT4-AS1	NA
42	cg07221444	chr12	TMEM116;TMEM116;TMEM116;TMEM116;TMEM116	NA
43	cg18496842	chr8	HR;HR	Co-MNCog1
44	cg03390969	chr6	ITPR3;ITPR3	NA
45	cg14308509	chr7	FOXK1	NA
46	cg11113628	chr4		NA
47	cg09740935	chr1	SLC26A9;SLC26A9	Co-MNCog1
48	cg09269454	chr10	HSPA12A	Co-MNCog1
49	cg15904623	chr7	FLNC;FLNC	Co-MNCog1
50	cg02451866	chr10	TSPAN15	Co-MNCog2
51	cg14537554	chr6	RMND1;RMND1;ARMT1;ARMT1;ARMT1;ARMT1	NA
52	cg05611160	chr9	LPPR1;LPPR1	NA
53	cg03189910	chr20		NA
54	cg01589135	chr21	CYYR1	NA
55	cg16341707	chr2		Co-MNCog2
56	cg25068166	chr6	SESN1;SESN1;SESN1	NA
57	cg02059867	chr17	RAPGEFL1;RAPGEFL1	NA
58	cg21474240	chr6	STX11	Co-MNCog2
59	cg07732331	chr6	TAAR2	NA
60	cg23541304	chr6	PLAGL1;PLAGL1;PLAGL1;PLAGL1;PLAGL1;PLAGL1;PLAGL1;PLAGL1;PLAGL1;PLAGL1;PLAGL1;PLAGL1;HYMAI;PLAGL1;PLAGL1;PLAGL1;PLAGL1;PLAGL1;PLAGL1;PLAGL1;PLAGL1;PLAGL1	NA
61	cg23354933	chr6		NA
62	cg19182919	chr15		NA
63	cg12626003	chr20	PHF20	NA
64	cg15983026	chr7	CNPY1	NA
65	cg00142815	chr1	TMCC2	NA
66	cg22659920	chr4		Co-MNCog2
67	cg16234191	chr8	ANXA13;ANXA13	NA
68	cg00591868	chr19	PBX4	NA
69	cg11391221	chr10	MYPN;MYPN;MYPN;MYPN;MYPN	NA
70	cg01650818	chr15	APBA2;APBA2	NA
71	cg22809408	chr6		NA
72	cg04627110	chr6	MOG;MOG;MOG;MOG;MOG;MOG;MOG;MOG;MOG;MOG;MOG	NA
73	cg14453423	chr9		NA
74	cg15598276	chr6	BRD2;BRD2	NA
75	cg19725111	chr6	ARMC2;ARMC2	Co-MNCog1
76	cg13216022	chr15	CYP19A1;CYP19A1	Co-MNCog2
77	cg10838385	chr14		NA
78	cg00985115	chr12		NA
79	cg21404028	chr1	TSEN15;TSEN15;TSEN15	NA
80	cg24959045	chr1	ASCL5	Co-MNCog1
81	cg27026002	chr3	LOC339862	Co-MNCog2
82	cg11409511	chr8		NA
83	cg13696171	chr2	GPR35	NA
84	cg16649474	chr19	RFX1	Co-MNCog1
85	cg16582803	chr2		NA
86	cg01232322	chr8		NA
87	cg19234412	chr11	ODZ4	NA
88	cg13283896	chr8	NRBP2	NA
89	cg17840178	chr6	FLOT1	Co-MNCog2
90	cg24146349	chr7	INTS1	Co-MNCog1
91	cg18053871	chr8	BNIP3L	NA
92	cg06132940	chr11	PTDSS2	NA
93	cg19372324	chr18		NA
94	cg23700928	chr22	FAM19A5;FAM19A5	Co-MNCog1
95	cg23844509	chr2	VPS54;VPS54	NA
96	cg18484591	chr11		NA
97	cg16937769	chr12	HOXC4;HOXC6;HOXC5	NA
98	cg10314221	chr15	SCAND2;SCAND2	NA
99	cg22193691	chr17	AP2B1;AP2B1	NA
100	cg03768622	chr1	ROR1;ROR1	NA
101	cg03485694	chr12	EFCAB4B;EFCAB4B;EFCAB4B	NA
102	cg02607802	chr13	LMO7	NA
103	cg22577081	chr5	ZCCHC10	NA
104	cg27017382	chr10	CDH23;CDH23	Co-MNCog1
105	cg09121415	chr12	RHEBL1	NA
106	cg14709901	chr20		NA
107	cg26978918	chr10		NA
108	cg05726342	chr20		NA
109	cg00198337	chr5	SLC12A7	NA
110	cg27348120	chr9		NA
111	cg20962039	chr2	OBSL1	NA
112	cg01660149	chr8	TATDN1;TATDN1;TATDN1;TATDN1;TATDN1;NDUFB9	NA
113	cg00703557	chr20	SNORA51;SNORD86;NOP56;NOP56;NOP56;NOP56	NA
114	cg03189153	chr8	LOC100288748	NA
115	cg02569509	chr7		NA
116	cg11787005	chr10	HTR7;HTR7;HTR7	Co-MNCog2
117	cg08901046	chr11	ETS1;ETS1;ETS1	Co-MNCog2
118	cg03771844	chr14	PRO1768;FOXN3	NA
119	cg23101259	chr11	C11orf30;C11orf30	NA
120	cg13724111	chr9	ADAMTSL1	NA
121	cg08580399	chr15	THBS1	Co-MNCog1
122	cg08753227	chr21	HSF2BP	Co-MNCog1
123	cg01050225	chr16	A2BP1;A2BP1;A2BP1;A2BP1;A2BP1;A2BP1	NA
124	cg26527435	chr18	TAF4B	NA
125	cg21090896	chr6		NA
126	cg01390574	chr7		NA
127	cg24644367	chr22		NA
128	cg03377392	chr1	PRKCZ	Co-MNCog1
129	cg19593182	chr6	TRIM26	NA
130	cg12373084	chr9	C9orf150;C9orf150	NA
131	cg01223600	chr19	FPR2;FPR2	Co-MNCog2
132	cg01512466	chr10	CPXM2	NA
133	cg03744332	chr2		NA
134	cg26100071	chr11	ABCC8;ABCC8	Co-MNCog1
135	cg12217675	chr11	POU2F3;POU2F3	NA
136	cg19965644	chr13	FARP1;FARP1	Co-MNCog1
137	cg23658893	chr10		NA
138	cg01996567	chr7	SSPO	NA
139	cg06440960	chr1	SYT11	Co-MNCog2
140	cg02772928	chr3		NA
141	cg21434600	chr10		NA
142	cg09969462	chr17	TBCD	Co-MNCog2
143	cg26866348	chr5	LRRC14B	NA
144	cg10030633	chr7	MAD1L1;MAD1L1;MAD1L1	NA
145	cg02164004	chr6	RPS6KA2;RPS6KA2	Co-MNCog1
146	cg06433467	chr5		NA
147	cg13166116	chr22	OSBP2;OSBP2;OSBP2;OSBP2;OSBP2	Co-MNCog1
148	cg00926069	chr17	STAC2	NA
149	cg04157722	chr5		NA
150	cg00867835	chr7	SSPO	NA
151	cg20101398	chr6	HS3ST5	Co-MNCog1
152	cg22597210	chr19	C3P1	NA
153	cg06643227	chr9		NA
154	cg18278729	chr17	SERPINF2;SERPINF2;SERPINF2	Co-MNCog2
155	cg00536317	chr13		NA
156	cg13424940	chr9	VAV2;VAV2	NA
157	cg07795530	chr2		NA
158	cg02179652	chr11	BSX	NA
159	cg19789352	chr1	FAM110D	Co-MNCog1
160	cg02918872	chr5	SOX30;SOX30;SOX30	NA
161	cg10199840	chr22	TBC1D22A;TBC1D22A;TBC1D22A;TBC1D22A;TBC1D22A	Co-MNCog1
162	cg01811230	chr17	RAI1	NA
163	cg02172010	chr5	SGCD;SGCD;SGCD	NA
164	cg20601028	chr20		NA
165	cg06097861	chr4	NPY5R	Co-MNCog1
166	cg21000295	chr5	LSM11	NA
167	cg18489719	chr5	GFM2;NSA2;GFM2;GFM2	NA
168	cg04074945	chr11	PHF21A;PHF21A	Co-MNCog2
169	cg18455414	chr6		Co-MNCog2
170	cg21834739	chr6	BAT2	NA
171	cg16590190	chr1	PDPN;PDPN	NA
172	cg01373852	chr13		NA
173	cg23704675	chr2	USP37	Co-MNCog2
174	cg27561786	chr1	RERE;RERE	NA
175	cg12351042	chr6	OR2B2	Co-MNCog2
176	cg25249670	chr18	CTDP1;CTDP1	NA
177	cg08335107	chr2		NA
178	cg02512559	chr16	CFDP1	NA
179	cg11811513	chr2	ZNF804A	NA
180	cg13710976	chr13	SACS;SACS	NA
181	cg27044429	chr1	LRRC38	NA
182	cg03455637	chr14		NA
183	cg03075631	chr2		NA
184	cg20550520	chr14	ARHGAP5;C14orf128;ARHGAP5	NA
185	cg25246144	chr6	LINC00243	NA
186	cg05774868	chr15	STARD9	NA
187	cg03194064	chr16	DOK4	NA
188	cg14355949	chr15	LOC100128714	Co-MNCog1
189	cg07681487	chr18	LDLRAD4;LDLRAD4	NA
190	cg02852162	chr17		NA
191	cg08805748	chr6	ABCF1;ABCF1	NA
192	cg04921533	chr14		NA
193	cg16671079	chr17	MGAT5B;MGAT5B	Co-MNCog1
194	cg25527123	chr19	ZNF583;ZNF583;ZNF583	NA
195	cg11304573	chr10	LOC101928994	NA
196	cg04247230	chr11	MUC2	NA
197	cg06875162	chr1		Co-MNCog2
198	cg02950812	chr11		NA
199	cg15045943	chr5	STK10	NA
200	cg26168224	chr5		NA
201	cg00746130	chr6	BAT5	NA
202	cg24604628	chr19	SLC25A42	NA
203	cg26790313	chr3	KBTBD8	Co-MNCog2
204	cg02934347	chr6	CAP2	NA
205	cg15053629	chr11	SHANK2	NA
206	cg24944075	chrX	GPR174	NA
207	cg19311253	chr7		NA
208	cg01689239	chr12		NA
209	cg07452777	chr3	PRR23A	NA
210	cg00082426	chr2	XPO1	NA
211	cg09061753	chr5	LINC01411	NA
212	cg13821988	chr3		Co-MNCog2
213	cg10097651	chr14		Co-MNCog2
214	cg23676961	chr1	OMA1	NA
215	cg16816874	chr8	GATA4	NA
216	cg24281277	chr1	TOR3A	NA
217	cg01057945	chr12	LOC283332	NA
218	cg13392302	chr8	PSCA	Co-MNCog1
219	cg16429759	chr1	PHLDA3;PHLDA3	Co-MNCog1
220	cg23679447	chr11	PDE2A;PDE2A	Co-MNCog2
221	cg26871703	chr15	MGC15885	Co-MNCog1
222	cg18086664	chr6		NA
223	cg24458846	chr11	C11orf80	NA
224	cg24804106	chr8	PSD3	NA
225	cg27589731	chr1	CA14	NA
226	cg22352371	chr3	IL17RD	NA
227	cg23362667	chr1	DSTYK;DSTYK	NA
228	cg10089801	chr2		NA
229	cg03061239	chr1	TRIM17;TRIM17;TRIM17;TRIM17;TRIM17;TRIM17	NA
230	cg19546875	chr21	TRAPPC10	NA
231	cg26375182	chr22	SGSM3	NA
232	cg14137548	chr10	C10orf72;C10orf72	Co-MNCog1
233	cg27405030	chr7		Co-MNCog2
234	cg09280022	chr10	DIP2C	Co-MNCog1
235	cg24361098	chr2	BCL11A;BCL11A;BCL11A	Co-MNCog2
236	cg19255722	chr3	SCN10A	Co-MNCog2
237	cg08304080	chr8		NA
238	cg14676702	chr2	C2orf77;KLHL23;PHOSPHO2	NA
239	cg08748457	chr12	PXMP2	NA
240	cg19495308	chr6	TRIM10;TRIM10	Co-MNCog2
241	cg07484255	chr15	CDAN1	NA
242	cg23852542	chr12	FAIM2	Co-MNCog2
243	cg22022379	chr19	MYH14;MYH14;MYH14	NA
244	cg15644780	chr5	MIER3;MIER3;MIER3	Co-MNCog1
245	cg00984694	chr16	NDRG4;NDRG4;NDRG4;NDRG4	NA
246	cg26604256	chr19	RFX2;RFX2	NA
247	cg25991374	chr1		NA
248	cg15242449	chr6		NA
249	cg05248470	chr19	LILRB2;LILRB2	Co-MNCog1
250	cg02238136	chr3	ZNF620;ZNF620	NA
251	cg15910506	chr20	DIDO1;DIDO1;DIDO1;DIDO1;DIDO1;DIDO1	NA
252	cg20280926	chr2	GALNT14;GALNT14;GALNT14;GALNT14	Co-MNCog1
253	cg16461320	chr1	MOV10;MOV10;MOV10	NA
254	cg18485641	chr21	WRB	Co-MNCog2
255	cg07450552	chr5	DNAJC18	NA
256	cg20561790	chr19	AXL;AXL;AXL;AXL	NA
257	cg05958255	chr9	PTPRD	NA
258	cg04110478	chr5		NA
259	cg07486374	chr15		NA
260	cg01677327	chr8		NA
261	cg19058209	chr10	NRG3;NRG3;NRG3	NA
262	cg02027429	chr5		NA
263	cg06090314	chr9	FAM120A;FAM120A;FAM120A;FAM120A;FAM120A;FAM120A;FAM120A	Co-MNCog1
264	cg12434875	chr15	DUOX1;DUOX1	NA
265	cg26144070	chr21	LRRC3	NA
266	cg16629469	chr6		NA
267	cg24994350	chr6	LATS1	NA
268	cg06746893	chr19	BRUNOL5	NA
269	cg21194021	chr8	TSNARE1	NA
270	cg09579932	chr17	TRPV1;TRPV1;TRPV1	Co-MNCog1
271	cg16816427	chr10	PALD1	Co-MNCog1
272	cg21325855	chr5		Co-MNCog2
273	cg24948564	chr12	OAS3	Co-MNCog1
274	cg02855778	chr7	PTPRN2;PTPRN2;PTPRN2	Co-MNCog2
275	cg02355868	chr16	CBFA2T3	Co-MNCog1
276	cg01495425	chr15		NA
277	cg04673494	chr17	SSH2;SSH2;SSH2	NA
278	cg16686932	chr18	RBFADN	Co-MNCog1
279	cg14549634	chr14	WDR25;WDR25	Co-MNCog2
280	cg01352656	chr2		NA
281	cg06067169	chr16		NA
282	cg11775053	chr9	FANCC;FANCC;FANCC	NA
283	cg26851153	chr3	RBMS3;RBMS3;RBMS3;RBMS3;RBMS3	NA
284	cg02186441	chr2	C2orf86;MDH1	NA
285	cg14717659	chr3	TNFSF10;TNFSF10;TNFSF10	Co-MNCog2
286	cg16573957	chr8		NA
287	cg24634568	chr1		NA
288	cg15737817	chr19		NA
289	cg05187700	chr13	SPERT	NA
290	cg15207883	chr20		Co-MNCog2
291	cg15784048	chr1	PADI4	NA
292	cg14107271	chr5	ARHGAP26;ARHGAP26	Co-MNCog2
293	cg11471115	chr6		NA
294	cg17235505	chr3	SETD5;SETD5;LOC440944	NA
295	cg20665736	chr15		NA
296	cg20649663	chr2	HECW2	Co-MNCog1
297	cg05125667	chr10	CHST3	NA
298	cg24122929	chr19	FAM98C	NA
299	cg07637375	chr16	LRRC50	NA
300	cg10476206	chr10	CAMK1D;CAMK1D	Co-MNCog2
301	cg25175370	chr7	C7orf27;C7orf27	NA
302	cg13993051	chr11		NA
303	cg08133958	chr6		NA
304	cg14271499	chr19	THOP1	NA
305	cg00963171	chr7	MAD1L1;MAD1L1;MAD1L1	NA
306	cg13715502	chr9	PTPN3;PTPN3;PTPN3;PTPN3;PTPN3;PTPN3	NA
307	cg23104930	chr12	FBRSL1	Co-MNCog1
308	cg21163717	chr8	DOK2	Co-MNCog2
309	cg02984711	chr16	LOC100287036;ANKRD11;ANKRD11;ANKRD11;ANKRD11	Co-MNCog2
310	cg13225591	chr1	SLC30A10;SLC30A10;RNU5F-1	NA
311	cg22592475	chr5	PIK3R1	NA
312	cg21005510	chr7		NA
313	cg13391176	chr2		NA
314	cg04324615	chr2	FBLN7;FBLN7	NA
315	cg23245007	chr3		NA
316	cg27086879	chr4	GALNTL6	Co-MNCog1
317	cg02594090	chr3	ATP11B	NA
318	cg07420027	chr3	IL12A;IL12A-AS1	Co-MNCog1
319	cg07390618	chr13	STARD13;STARD13;STARD13;STARD13	NA
320	cg19952762	chr4	KDR	Co-MNCog1
321	cg16111190	chr6	DDR1;DDR1;DDR1	NA
322	cg09368704	chr12	IL31;LRRC43	Co-MNCog1
323	cg14219677	chr9	ST6GALNAC6	NA
324	cg27188994	chr10	PARD3;PARD3;PARD3;PARD3;PARD3;PARD3;PARD3;PARD3;PARD3;PARD3;PARD3	NA
325	cg12159571	chr4	TBC1D14;TBC1D14;TBC1D14;TBC1D14	NA
326	cg05232274	chr1	C1orf212;C1orf212;C1orf212	NA
327	cg21832826	chr17		NA
328	cg22335074	chr11	SHANK2	NA
329	cg00350478	chr6	FRMD1	Co-MNCog1
330	cg13599928	chr19	MEF2BNB-MEF2B;MEF2BNB-MEF2B;MEF2BNB-MEF2B	NA
331	cg27616929	chr20	PREX1	Co-MNCog1
332	cg07941711	chr15	LACTB;LACTB;LACTB	NA
333	cg18464809	chr4	SORBS2;SORBS2;SORBS2;SORBS2;SORBS2;SORBS2;SORBS2	NA
334	cg26754508	chr1	H6PD;H6PD	Co-MNCog2
335	cg19386228	chr6		NA
336	cg12784167	chr7	PTPRN2;PTPRN2;PTPRN2;PTPRN2;PTPRN2	NA
337	cg07481619	chr7	AMZ1;AMZ1	NA
338	cg00203838	chr19	SLC35E1	NA
339	cg07043889	chr15		NA
340	cg00332305	chr6	TIAM2	NA
341	cg17418414	chr16		NA
342	cg12548638	chr1	EPHA10;EPHA10	NA
343	cg02911689	chr1	TRABD2B	Co-MNCog1
344	cg02079420	chr8	SNX16;SNX16;SNX16	Co-MNCog2
345	cg26403171	chr5		NA
346	cg09717029	chr15		NA
347	cg09926867	chr10	CAMK1D;CAMK1D	Co-MNCog1
348	cg10928878	chr9	ANGPTL2;RALGPS1;RALGPS1;RALGPS1;RALGPS1	Co-MNCog1
349	cg23665710	chr8		NA
350	cg13755204	chr9	VAV2;VAV2	NA
351	cg02341645	chr17	C17orf54	NA
352	cg13155300	chr21		Co-MNCog2
353	cg26314722	chr1		NA
354	cg20343982	chr22		NA
355	cg18724232	chr19	SAMD4B;SAMD4B;SAMD4B;SAMD4B	Co-MNCog1
356	cg12570921	chr5	C5orf66	Co-MNCog1
357	cg02629844	chr1		NA
358	cg07592337	chr11	PYGM;PYGM;PYGM;PYGM	NA
359	cg08263357	chr6	HYMAI;PLAGL1;PLAGL1;PLAGL1;PLAGL1;PLAGL1;PLAGL1;PLAGL1;PLAGL1	NA
360	cg20095680	chr19	BAX;BAX;BAX;BAX;BAX	NA
361	cg23004099	chr2		NA
362	cg03731316	chr6	UST	NA
363	cg05512561	chr13		Co-MNCog2
364	cg20128340	chr4	CBR4	NA
365	cg21401929	chr15	ALDH1A3;ALDH1A3	NA
366	cg02918093	chr16		Co-MNCog2
367	cg09468238	chr16		NA
368	cg17171801	chr17	PMP22;PMP22;PMP22	NA
369	cg10459672	chr6		NA
370	cg07253677	chr1	LINC01226	NA
371	cg07464716	chr5	SOX30;SOX30	NA
372	cg12470493	chr3		Co-MNCog2
373	cg04457792	chr10		NA
374	cg01564665	chr1		NA
375	cg24134018	chr18		NA
376	cg04425375	chr22	CABIN1;CABIN1;CABIN1	Co-MNCog2
377	cg23302740	chr8		NA
378	cg10020309	chr3	GTF2E1	Co-MNCog1
379	cg24827715	chr17	SLC47A2;SLC47A2;SLC47A2	Co-MNCog1
380	cg04043561	chr10		NA
381	cg19475961	chr8	TRAPPC9;TRAPPC9	Co-MNCog2
382	cg17092099	chr12		NA
383	cg21356613	chr11	OR51M1;OR51B5;OR51B5	NA
384	cg19049569	chr10	NANOS1;NANOS1	NA
385	cg21583054	chr19	ZNF480;ZNF480;ZNF480	NA
386	cg14295924	chr11		NA
387	cg03888765	chr1	KIF17;KIF17	Co-MNCog1
388	cg03441250	chr17		NA
389	cg03806695	chr14		NA
390	cg08051284	chr11	DDX25	NA
391	cg09850137	chr3		Co-MNCog2
392	cg03777135	chr9	PTPN3;PTPN3;PTPN3;PTPN3;PTPN3;PTPN3;PTPN3	Co-MNCog1
393	cg23950157	chr17	COL1A1	NA
394	cg11281342	chr16	LINC01572	NA
395	cg23070169	chr2	XIRP2;XIRP2;XIRP2;XIRP2;XIRP2	NA
396	cg15351009	chr5	LRRC14B	NA
397	cg09405612	chr7	GLI3	NA
398	cg10274453	chr13		Co-MNCog2
399	cg03226083	chr3		Co-MNCog2
400	cg07138491	chr1	FAM183A	NA
401	cg07846855	chr10	C10orf11	Co-MNCog1
402	cg12711961	chr5	LRRC14B	NA
403	cg19726630	chr3	CMTM8	NA
404	cg05760765	chr12		NA
405	cg19114920	chr12		NA
406	cg05050391	chr15		NA
407	cg27051611	chr22	OSBP2;OSBP2;OSBP2	Co-MNCog2
408	cg22215453	chr19	SUV420H2	NA
409	cg09381559	chr1		NA
410	cg14833040	chr6		NA
411	cg15490880	chr1	PKLR;PKLR	Co-MNCog2
412	cg18569695	chr8	TSNARE1	NA
413	cg10510442	chr8	ZHX2	Co-MNCog1
414	cg08223393	chr1	AGRN	NA
415	cg04117547	chr9		NA
416	cg12762449	chr13	MCF2L;MCF2L	Co-MNCog1
417	cg04829621	chr2		NA
418	cg15743533	chr20	FAM110A;FAM110A	Co-MNCog2
419	cg27019059	chr3		NA
420	cg15335617	chr7		NA
421	cg25148572	chr7		NA
422	cg03036904	chr1		NA
423	cg23636099	chr2	MGC13005;MGC13005	NA
424	cg19546781	chr16	CCL17;CCL17	Co-MNCog1
425	cg04290427	chr5		NA
426	cg03200786	chr4	RNF4	Co-MNCog1
427	cg00705668	chr19	MRPS12;SARS2;SARS2;SARS2;MRPS12;MRPS12;MRPS12;SARS2	NA
428	cg08367485	chr15		NA
429	cg12703888	chr12	ALG10B	NA
430	cg00258873	chr6	RPP21	NA
431	cg17909996	chr19		NA
432	cg07549187	chr2	FBLN7;FBLN7	NA
433	cg22069097	chr3	COL6A5;COL6A5;COL6A5	Co-MNCog1
434	cg07301793	chr3	LINC01330	Co-MNCog2
435	cg23093151	chr3	EPHB1	NA
436	cg22210905	chr14		NA
437	cg20630819	chr6	GCNT2	NA
438	cg26112622	chr1	PEX10;PEX10	NA
439	cg08527460	chr10		NA
440	cg15017067	chr4	FAM184B	NA
441	cg11767711	chr19	APLP1;APLP1	Co-MNCog1
442	cg07827395	chr7		Co-MNCog2
443	cg22735065	chr1		NA
444	cg11619533	chr5		NA
445	cg02652475	chr3	C3orf57	NA
446	cg08669718	chr4	ZNF718	NA
447	cg21180002	chr9	KDM4C;KDM4C;KDM4C	Co-MNCog2
448	cg15589930	chr1	DNTTIP2	NA
449	cg17369406	chr21	SON;SON	Co-MNCog2
450	cg04074766	chr7	ZNHIT1;ZNHIT1;PLOD3	NA
451	cg23068621	chr5		NA
452	cg17383627	chr2		NA
453	cg05223487	chr16		NA
454	cg12138818	chr13		NA
455	cg25414128	chr6		NA
456	cg10574006	chr5		NA
457	cg22531183	chr19	FLJ26850	NA
458	cg01817885	chr5	PDE4D;PDE4D	NA
459	cg13363713	chr5		NA
460	cg24435879	chr7		NA
461	cg20135711	chr12	ITGB7	NA
462	cg25163604	chr2		NA
463	cg00926855	chr5	MSH3	NA
464	cg13257390	chr11	AGBL2	Co-MNCog1
465	cg18406151	chr5	ERBB2IP;ERBB2IP;ERBB2IP;ERBB2IP;ERBB2IP;ERBB2IP	Co-MNCog1
466	cg23457518	chr10		NA
467	cg11637718	chr16	ADCY9	NA
468	cg12539796	chr5	C5orf49	NA
469	cg05304361	chr19		NA
470	cg26282150	chr1	GNAI3	NA
471	cg10636442	chr10	CDH23;CDH23;CDH23;CDH23;CDH23	Co-MNCog1
472	cg21210220	chr2		NA
473	cg02787615	chr2	C2orf55	Co-MNCog1
474	cg09575151	chr7		NA
475	cg09318637	chr17	RPTOR;RPTOR	NA
476	cg09980774	chr6	HIST1H4H	NA
477	cg08053947	chr14	FAM181A;FAM181A;FAM181A-AS1	Co-MNCog1
478	cg09874472	chr9	PGM5	Co-MNCog2
479	cg00754323	chr17	WNT9B	Co-MNCog1
480	cg14089103	chr11	HCCA2	NA
481	cg01270001	chr7	LRRC61;ACTR3C;LRRC61;LRRC61;LRRC61	NA
482	cg03891993	chr1	LOC101928241	Co-MNCog1
483	cg11758984	chr2	LOC101927967	NA
484	cg12723026	chr1	KCNC4;KCNC4;KCNC4	NA
485	cg07846523	chr11	C11orf44	Co-MNCog1
486	cg16340103	chr12		NA
487	cg01790344	chr17		Co-MNCog2
488	cg04015603	chr2		NA
489	cg13050930	chr6	CDYL;CDYL	NA
490	cg05583456	chr10	FRMD4A	NA
491	cg07251788	chr22	CLTCL1;CLTCL1	NA
492	cg23829641	chr20	PTPRT;PTPRT	Co-MNCog1
493	cg15059618	chr11		NA
494	cg26555966	chr15	IGDCC3	NA
495	cg08060195	chr6	TRIM10;TRIM10	Co-MNCog2
496	cg05344293	chr16	COTL1	NA
497	cg06413759	chr4		NA
498	cg13900625	chr7		Co-MNCog2
499	cg16721001	chr19	EPS8L1	Co-MNCog1
500	cg17694593	chr8	CA1;CA1;CA1;CA1	Co-MNCog1
501	cg01986275	chr5		NA
502	cg03559836	chr12	CPSF6	NA
503	cg04305821	chr16	ZCCHC14	Co-MNCog1
504	cg03331958	chr2	SMYD1	Co-MNCog1
505	cg15800327	chr10	FAM53B	Co-MNCog1
506	cg02916470	chr10	PTPLA	NA
507	cg22575043	chr7		NA
508	cg06494135	chr16		NA
509	cg05254239	chr8	TRIQK;TRIQK;TRIQK;TRIQK;TRIQK;TRIQK;TRIQK	NA
510	cg12305425	chrX	SERPINA7	NA
511	cg03138405	chr19	GLT25D1	NA
512	cg25444002	chr13	FGF14;FGF14	NA
513	cg19042497	chr18		NA
514	cg11843286	chr16	ARHGAP17;ARHGAP17	NA
515	cg05478082	chr7	AKR1B15	NA
516	cg21739707	chr2		NA
517	cg03228185	chr6	TFEB;TFEB;TFEB;TFEB;TFEB	Co-MNCog2
518	cg15613148	chr15	THSD4;THSD4	Co-MNCog1
519	cg05884205	chr2	KIF3C	NA
520	cg04950029	chr12	BCL7A;BCL7A	NA
521	cg06429103	chr8		NA
522	cg03381007	chr16	GALNS	Co-MNCog1
523	cg03404134	chr2	ANKRD44	Co-MNCog2
524	cg18700940	chr17	MAP3K14	Co-MNCog2
525	cg13428213	chr9	PTCH1;PTCH1;PTCH1;PTCH1;PTCH1;PTCH1;PTCH1	NA
526	cg16223967	chr7	PRKAR1B;PRKAR1B;PRKAR1B;PRKAR1B;PRKAR1B;PRKAR1B	NA
527	cg13541704	chr15	MEGF11	NA
528	cg11327463	chr22	EMID1;EMID1;EMID1;EMID1	Co-MNCog1
529	cg10045925	chr2	LINC00309;LINC00309	Co-MNCog2
530	cg06811101	chr10		NA
531	cg04075781	chr3		NA
532	cg00921138	chr16	BEAN1;BEAN1;BEAN1;BEAN1;BEAN1;BEAN1;BEAN1;BEAN1	Co-MNCog1
533	cg11983516	chr2		NA
534	cg08461802	chr10	DIP2C	Co-MNCog1
535	cg03291037	chr15	LINC01581	NA
536	cg09300703	chr8		Co-MNCog2
537	cg02454210	chr19	ZNF576;ZNF576;ZNF576;IRGQ	NA
538	cg07730193	chr8	R3HCC1;R3HCC1;R3HCC1	Co-MNCog2
539	cg06442673	chr5	LARP1;LARP1	NA
540	cg25778220	chr18	SMAD4	NA
541	cg06785108	chr21	APP;APP;APP;APP;APP;APP;APP;APP;APP;APP	Co-MNCog1
542	cg01616571	chr9	CDC26;PRPF4;PRPF4	NA
543	cg25959752	chr14		NA
544	cg04349084	chr8		NA
545	cg01912834	chr14	LOC101927081	NA
546	cg17984267	chr4		Co-MNCog2
547	cg13536080	chr11		Co-MNCog2
548	cg14542186	chr1	TTC22;TTC22	Co-MNCog1
549	cg10693071	chr5	TRIM36;TRIM36;TRIM36	NA
550	cg23748340	chr12		NA
551	cg12386698	chr17		NA
552	cg00815214	chr21		NA
553	cg14744022	chr5	AHRR	NA
554	cg10409596	chr22		NA
555	cg11714554	chr10		NA
556	cg07076335	chr12	CDK2;CDK2;CDK2	NA
557	cg09418612	chr17	PNPO	NA
558	cg09755512	chr9	PAPPA	NA
559	cg10585208	chr19	CLEC4GP1	NA
560	cg01883396	chr15	THSD4	Co-MNCog2
561	cg05462359	chr5	GDNF	NA
562	cg05985767	chr15	ANPEP	Co-MNCog1
563	cg11527695	chr6		NA
564	cg20459189	chr19	IL4I1;IL4I1;IL4I1;IL4I1;NUP62;NUP62;NUP62;NUP62;NUP62	NA
565	cg04916821	chr2		Co-MNCog2
566	cg02249911	chr4	CCDC111;CASP3;CASP3	NA
567	cg01138530	chr22	JOSD1	NA
568	cg01624761	chr20		NA
569	cg25418831	chr9	VPS13A;VPS13A;LOC100286938;VPS13A;VPS13A	NA
570	cg00512563	chr16	FBXO31;FBXO31	NA
571	cg27230769	chr6	LOC285830;LOC285830	NA
572	cg06230736	chr10	FLJ45983;GATA3;GATA3;FLJ45983	NA
573	cg27490277	chr2		NA
574	cg13817798	chr2	BARD1;BARD1;BARD1;BARD1;BARD1;BARD1;BARD1;BARD1	NA
575	cg00341602	chr1	ISG20L2	NA
576	cg19828537	chr2	FAM178B;FAM178B	Co-MNCog1
577	cg09309687	chr7	SDK1	Co-MNCog1
578	cg11090631	chr1		NA
579	cg20037088	chr7		NA
580	cg00205703	chr3	FAM131A;FAM131A	NA
581	cg05041596	chr11	NAALAD2	NA
582	cg17942426	chr2	SPC25	NA
583	cg04612248	chr18	RAB31	NA
584	cg21345125	chr16		NA
585	cg22755875	chr7		NA
586	cg02517755	chr10		NA
587	cg01418795	chr14	HIF1A;HIF1A;HIF1A	Co-MNCog2
588	cg08207660	chr14		NA
589	cg27217167	chr17		NA
590	cg10994397	chr1	MIB2;MIB2;MIB2;MIB2;MIB2;MIB2	Co-MNCog1
591	cg07273222	chr16	CES4	NA
592	cg20357446	chr4		NA
593	cg09727210	chr7	CARD11	NA
594	cg01611141	chr5	SEMA5A	NA
595	cg23819669	chr3	DNAJB8	Co-MNCog1
596	cg24856518	chr2	PTPN4;PTPN4	NA
597	cg01293971	chr2		NA
598	cg15876825	chr3	VGLL4;VGLL4	Co-MNCog1
599	cg02194492	chr10	MAT1A;MAT1A	NA
600	cg02045164	chr10	INPP5A	Co-MNCog1
601	cg02098752	chr5	GPRIN1	NA
602	ch.1.48110560R	chr1		NA
603	cg06529676	chr5	KCNIP1;KCNIP1;KCNIP1;KCNIP1;KCNIP1	NA
604	cg07050033	chr9		NA
605	cg21267507	chr2		NA
606	cg15693399	chr13	LINC00426	Co-MNCog2
607	cg01641092	chr6		NA
608	cg02792322	chr13	IL17D	Co-MNCog1
609	cg26839010	chr1	C1orf87	NA
610	cg06225154	chr22	RAC2	NA
611	cg12591662	chrX		NA
612	cg23883807	chr6	ATXN1;ATXN1	Co-MNCog2
613	cg26965236	chr8		NA
614	cg26190757	chr12		Co-MNCog2
615	cg25690118	chr1	CGN	Co-MNCog1
616	cg02556928	chr22	CSF2RB	Co-MNCog2
617	cg05397848	chr10	CFAP46	NA
618	cg24523635	chr16	UQCRC2	NA
619	cg05650494	chr10	HNRNPF;HNRNPF;HNRNPF;HNRNPF;HNRNPF	NA
620	cg07524505	chr11	TSPAN18	Co-MNCog1
621	cg09959109	chr12	GALNT9	NA
622	cg02447728	chr2		NA
623	cg14577406	chr9		NA
624	cg03743597	chr1	RNU11	NA
625	cg13240333	chr8	ZFHX4-AS1	Co-MNCog2
626	cg21007645	chr14		Co-MNCog2
627	cg16133943	chr11	LRP5	NA
628	cg00692780	chr2	EPHA4	NA
629	cg08263040	chr1	CDC20	NA
630	cg06627532	chr16	CMIP	Co-MNCog2
631	cg20027133	chr11	PAMR1;PAMR1	NA
632	cg19225688	chr2	CXCR2;CXCR2;CXCR2	Co-MNCog2
633	cg03449398	chr7		NA
634	cg12831076	chr8	ST3GAL1;ST3GAL1	NA
635	cg01806427	chr5		NA
636	cg25962840	chr2	PSD4;LOC440839	NA
637	cg23804566	chr4		NA
638	cg26223259	chr15	LINC01197	NA
639	cg06837596	chr14	MDGA2;MDGA2	Co-MNCog2
640	cg09438069	chr4	FAT1	NA
641	cg17299566	chr14	SMOC1;SMOC1	Co-MNCog1
642	cg14128032	chr15	ISL2	NA
643	cg09337943	chr11	SLC22A11	Co-MNCog1
644	cg03743605	chr1	TOR3A	NA
645	cg15406943	chr9	LOC101929331	Co-MNCog1
646	cg14368972	chr9	KCNV2	NA
647	cg11791210	chr18	NOL4;NOL4;NOL4	NA
648	cg26998481	chr6	COL11A2;COL11A2;COL11A2	Co-MNCog1
649	cg08497330	chr6		NA
650	cg19562160	chr19	THAP8	Co-MNCog1
651	cg09704555	chr7		NA
652	cg06713429	chr11		NA
653	cg24839386	chr10	UNC5B	Co-MNCog2
654	cg12764441	chr1	RERE;RERE	NA
655	cg05797333	chr2	MXD1	NA
656	cg22651098	chr6	ZNF165;ZNF165	NA
657	cg04975505	chr14	FLRT2	NA
658	cg23691894	chr10	ADD3;ADD3	NA
659	cg10376995	chr6		NA
660	cg03844894	chr15	ACTC1	NA
661	cg26643617	chr22	C22orf39;C22orf39	NA
662	cg12662660	chr12		NA
663	cg15868237	chr2	DIS3L2	NA
664	cg16134070	chr1	PLA2G2C	Co-MNCog1
665	cg26380956	chr19	ATP1A3;ATP1A3;ATP1A3	Co-MNCog1
666	cg04659311	chr1	VAV3	NA
667	cg21771628	chr22	MAPK12;MAPK12	NA
668	cg18139878	chr4		NA
669	cg10037905	chr12	ITPR2	NA
670	cg12546081	chr15	TMED3	NA
671	cg14016196	chr1	UBE2U	Co-MNCog2
672	cg08034663	chr12	NCOR2;NCOR2	NA
673	cg17945419	chr10	PAX2;PAX2;PAX2;PAX2;PAX2	NA
674	cg09002919	chr12		NA
675	cg02807723	chr1	CRB1;CRB1;CRB1;CRB1;CRB1;CRB1	Co-MNCog1
676	cg24204878	chr7	PTPRN2;PTPRN2;PTPRN2	Co-MNCog1
677	cg26660800	chr17	TBX2	NA
678	cg09429338	chr4	SHROOM3	Co-MNCog1
679	cg19523670	chr20	ZBP1;ZBP1;ZBP1	Co-MNCog1
680	cg03373519	chr4		NA
681	cg19182267	chr3	IL17RD	Co-MNCog1
682	cg21909343	chr11	SSSCA1;SSSCA1-AS1;SSSCA1	NA
683	cg19844467	chr7	RSBN1L	NA
684	cg14955976	chr11		NA
685	cg12368557	chr8	PDGFRL	Co-MNCog1
686	cg16655343	chr6	LOC285830;LOC285830	NA
687	cg09400565	chr15		Co-MNCog2
688	cg10515824	chr8		NA
689	cg04710629	chr2	C2orf88;C2orf88;C2orf88;C2orf88	Co-MNCog2
690	cg17259065	chr5	FABP6;FABP6	NA
691	cg24875634	chr14		Co-MNCog2
692	cg09013709	chr4		NA
693	cg13712183	chr11	SORL1	Co-MNCog2
694	cg21131424	chr12	DDX51	NA
695	cg07190058	chr11	DIXDC1;DIXDC1	Co-MNCog1
696	cg22928082	chr20	SLC4A11	NA
697	cg09583780	chr5		NA
698	cg17297283	chrX	TBC1D25	Co-MNCog2
699	cg18206481	chr1	LMX1A	NA
700	cg11461263	chr19	MIR520G	Co-MNCog1
701	cg10946938	chr11	MACROD1	NA
702	cg24803573	chr1	SMYD3;SMYD3	NA
703	cg15392097	chr6		NA
704	cg22732515	chr19	ETHE1;ETHE1	NA
705	cg08866927	chr9	MVB12B;MVB12B	NA
706	cg01926813	chr3	PRR23A	NA
707	cg00541854	chr17	GPR142	Co-MNCog1
708	cg14074184	chr10		NA
709	cg24284822	chr4	CXCL13	NA
710	cg10913296	chr12		NA
711	cg27521567	chr19	ILF3;ILF3;ILF3;ILF3;ILF3	NA
712	cg12767196	chr1	TNR	Co-MNCog1
713	cg03719083	chr6	TFAP2A;TFAP2A;TFAP2A	NA
714	cg23890383	chr3	LZTFL1;LZTFL1	Co-MNCog2
715	cg12214913	chr4	ADH7;ADH7	NA
716	cg01765416	chr12		NA
717	cg16544989	chr16		NA
718	cg11889721	chr3		NA
719	cg22388218	chr19		NA
720	cg13222081	chr14	MRPL52;MRPL52;MRPL52;MRPL52;MRPL52;MRPL52	NA
721	cg05762256	chr6		NA
722	cg15416105	chr17		NA
723	cg05930046	chr12		NA
724	cg10728454	chr15	GPR176;GPR176	Co-MNCog2
725	cg00670465	chr12	CCDC77;CCDC77;CCDC77;CCDC77	NA
726	cg19809645	chr2	CAPN13	Co-MNCog1
727	cg11384517	chr15	UBE2Q2;UBE2Q2;UBE2Q2	NA
728	cg03697727	chr10	RHOBTB1;RHOBTB1	NA
729	cg21443480	chr21	LOC284825	NA
730	cg14349023	chr9		NA
731	cg13989834	chr9	UCK1;UCK1	NA
732	cg14854723	chr9	MVB12B	NA
733	cg05823759	chr7		NA
734	cg06621358	chr3	CELSR3	NA
735	cg11149521	chr17	WDR81;WDR81;WDR81;WDR81	NA
736	cg04720665	chr1	HNRNPU;HNRNPU	NA
737	cg11026333	chr7	LRRC61;ACTR3C;LRRC61	NA
738	cg06010324	chr10		NA
739	cg05888027	chr4		NA
740	cg16224278	chr22	NFAM1	Co-MNCog1
741	cg15632228	chr1		NA
742	cg13040816	chr6	MDC1	NA
743	cg01612594	chr11	STIM1;STIM1;STIM1	Co-MNCog2
744	cg05790828	chr7	AGAP3	Co-MNCog1
745	cg02567505	chr8		NA
746	cg12874963	chr15		NA
747	cg10492836	chr10		NA
748	cg10414466	chr5	FABP6;FABP6	NA
749	cg19895742	chr19		NA
750	ch.6.1239582F	chr6	TRAM2	Co-MNCog2
751	cg10844318	chr4	GRSF1;GRSF1;GRSF1	NA
752	cg06626898	chr10		NA
753	cg12399197	chr15	THSD4	Co-MNCog1
754	cg03277534	chr20		NA
755	cg12323063	chr17	MAP2K6	Co-MNCog2
756	cg22172143	chr5	SLC12A7	NA
757	cg20827804	chr3	ANKRD28;ANKRD28;ANKRD28	NA
758	cg18262224	chr5		NA
759	cg16362915	chr6	VPS52	NA
760	cg05785155	chr2		NA
761	cg00442390	chr6	RNU6-71P;DST;DST;DST	NA
762	cg12366978	chr17	TMEM105	Co-MNCog2
763	cg06348192	chr20		NA
764	cg26999933	chr16	RSL1D1	NA
765	cg19392134	chr15		NA
766	cg21489266	chr3	LRRC2;TDGF1	NA
767	cg07519926	chr22		NA
768	cg23213375	chr1		NA
769	cg14976225	chr17	NXN	NA
770	cg10757159	chr9	LINGO2	NA
771	cg00402828	chr6	RNF8;RNF8;RNF8	NA
772	cg03239957	chr19		NA
773	cg12900497	chr2		NA
774	cg09449988	chr7	PRKAG2;PRKAG2;PRKAG2	Co-MNCog2
775	cg10417457	chr16		NA
776	cg16992216	chr18	NEDD4L;NEDD4L;NEDD4L;NEDD4L;NEDD4L;NEDD4L;NEDD4L;NEDD4L;NEDD4L	NA
777	cg07743742	chr5		NA
778	cg07474083	chr16		NA
779	cg22110477	chr20		NA
780	cg16394952	chr16		NA
781	cg09738205	chrX	BCYRN1	NA
782	cg23986444	chrX		NA
783	cg21929564	chr5	CCDC152	NA
784	cg18128182	chr5	RBM27	NA
785	cg21740960	chr6	REPS1;REPS1;REPS1;REPS1	Co-MNCog1
786	cg02949969	chr10	ZNF37B	NA
787	cg11320225	chr1		NA
788	cg09614189	chr9	WNK2;WNK2	Co-MNCog1
789	cg10613706	chr17		NA
790	cg11830461	chr20		Co-MNCog2
791	cg12452155	chr8	ADAM5	NA
792	cg07627699	chr4		NA
793	cg12820609	chr6	PLAGL1;PLAGL1;PLAGL1;PLAGL1;PLAGL1;PLAGL1;PLAGL1;PLAGL1;PLAGL1;PLAGL1;PLAGL1;PLAGL1;HYMAI;PLAGL1;PLAGL1;PLAGL1;PLAGL1;PLAGL1;PLAGL1;PLAGL1;PLAGL1;PLAGL1	NA
794	cg16672421	chr1	C1orf96	NA
795	cg23569968	chr11	SCGB1A1	Co-MNCog1
796	cg27207430	chr12	SMARCD1;SMARCD1	NA
797	cg01879195	chr18		Co-MNCog2
798	cg05605299	chr6	ZNF323;ZNF323;ZNF323;ZNF323;ZNF323;ZNF323	NA
799	cg01299229	chr17	CXCL16;CXCL16	Co-MNCog2
800	cg01982533	chr17	AXIN2	Co-MNCog1
801	cg04120329	chr10	PRAP1;PRAP1	NA
802	cg19990022	chr5	PCDHB1	NA
803	cg11784420	chr11	ARHGEF17	Co-MNCog1
804	cg03589259	chr3	BSN	Co-MNCog1
805	cg14651457	chr8	LONRF1	NA
806	cg03451607	chr7	AKR1B15	NA
807	cg14117541	chr1	C1orf127	NA
808	cg06276229	chr16	NAT15;NAT15;NAT15	NA
809	cg17101843	chr17		NA
810	cg09299628	chr17	SKAP1;SKAP1	NA
811	cg02943676	chr7	PRKAR1B;PRKAR1B;HEATR2;PRKAR1B	NA
812	cg16896911	chr19	PEPD;PEPD;PEPD	Co-MNCog2
813	cg08877293	chr11	FOSL1	NA
814	cg19429323	chr2		NA
815	cg02593579	chr12	C12orf49;RNFT2;RNFT2	NA
816	cg24572358	chr6	CLVS2	NA
817	cg09174717	chr2	LRP1B	NA
818	cg18039340	chr12	C1RL;LOC283314	NA
819	cg06230513	chr13		NA
820	cg11697194	chr5		Co-MNCog2
821	cg02906407	chr7	SSPO	NA
822	cg21875114	chr11	ETS1	Co-MNCog1
823	cg14615696	chr10		NA
824	cg11575141	chr1		NA
825	cg20207276	chr8	SLC25A37	NA
826	cg21340821	chr2		Co-MNCog2
827	cg07154770	chr11	DYNC2H1;DYNC2H1	NA
828	cg06717221	chr19	ATP8B3	NA
829	cg06504925	chr11		NA
830	cg23085553	chr4		NA
831	cg17620969	chr17		NA
832	cg17397365	chr18	CD226;CD226;CD226	Co-MNCog1
833	cg10023040	chr3		NA
834	cg01013522	chr2	CNTNAP5	NA
835	cg12516959	chr21		NA
836	cg03673292	chr11	LRRC4C;LRRC4C;LRRC4C;LRRC4C	NA
837	cg18983337	chr17		Co-MNCog2
838	cg07355708	chr14		NA
839	cg24012925	chr20	SRXN1	NA
840	cg05538945	chrX	ARHGEF6;ARHGEF6	Co-MNCog2
841	cg19032528	chr12	GCN1	NA
842	cg18563464	chr11		NA
843	cg25951501	chr17	SLFN12L	NA
844	cg12173487	chr16	CPNE2	Co-MNCog2
845	cg01458821	chr5		NA
846	cg00830444	chr16	UNKL	Co-MNCog1
847	cg06236276	chr6	SLC22A2	Co-MNCog1
848	cg19792174	chr17	TBC1D28	NA
849	cg24729228	chr11	APOC3	Co-MNCog2
850	cg15225881	chr11	ANAPC15;ANAPC15;ANAPC15;ANAPC15;ANAPC15;ANAPC15;ANAPC15;ANAPC15;ANAPC15;ANAPC15;ANAPC15	NA
851	cg20597484	chr12	HNF1A	Co-MNCog1
852	cg14306145	chr5	PCDHGA2;PCDHGA2;PCDHGA1	NA
853	cg05088433	chr2		NA
854	cg18204120	chr14		NA
855	cg21506555	chr13		NA
856	cg01487765	chr16	FHOD1;FHOD1	NA
857	cg01701819	chr15	SCAMP5	NA
858	cg21277742	chr3	C3orf20;C3orf20;C3orf20	Co-MNCog1
859	cg13820726	chr9		NA
860	cg25475056	chr19	COX6B1	NA
861	cg05432213	chr15	ACTC1	NA
862	cg25989375	chr22	LINC01315;LINC01315;LINC01315	NA
863	cg13089041	chr19	OR10H1	Co-MNCog1
864	cg15084618	chr11	TUB	NA
865	cg19113906	chr7	TCAF1;TCAF1;TCAF1	NA
866	cg21782813	chr7	MAD1L1;MAD1L1;MAD1L1	NA
867	cg03311349	chr6	SNRPC;SNRPC	NA
868	cg03895784	chr16	FAM38A	NA
869	cg27430561	chr7		Co-MNCog2
870	cg01541378	chr3		NA
871	cg19992636	chr7	PPIA;PPIA	NA
872	cg05709581	chr12	ADGRD1	NA
873	cg04517614	chr3	MAGI1;MAGI1;MAGI1	Co-MNCog1
874	cg11012775	chr1	CCDC24	NA
875	cg21492127	chr6	LOC285768;LOC285768	NA
876	cg19596243	chr6	JARID2;JARID2	NA
877	cg09738214	chr5	ATP6V0E1	NA
878	cg27235313	chr1	SYT6;SYT6	Co-MNCog1
879	cg26183671	chr1	RUNX3	Co-MNCog1
880	cg06521148	chr11	MS4A15;MS4A15	NA
881	cg17150275	chr19	ZNF480;ZNF480;ZNF480	NA
882	cg12309703	chr2	DIRC3	NA
883	cg01248347	chr9	TMEM215	NA
884	cg20785612	chr18	HDHD2	Co-MNCog1
885	cg08957036	chr7		NA
886	cg11483915	chr2	SLC40A1	NA
887	cg18140857	chr8	SDR16C5	Co-MNCog1
888	cg02513768	chr9		NA
889	cg03096785	chr1	CTRC	NA
890	cg09524658	chr3		Co-MNCog2
891	cg05038391	chr7		NA
892	cg06741446	chr1	HIVEP3;HIVEP3;HIVEP3;HIVEP3	Co-MNCog1
893	cg06045408	chr11	HTATIP2;HTATIP2;HTATIP2;HTATIP2;HTATIP2	NA
894	cg06957878	chr7	GPER1;GPER1;C7orf50;C7orf50;C7orf50	NA
895	cg12186909	chr19	PDE4A	NA
896	cg09560399	chr11	ZDHHC13;ZDHHC13	NA
897	cg01960647	chr19	HNRNPUL1	NA
898	cg26922780	chr16	RNF166	NA
899	cg24361086	chr7	WASL	NA
900	cg23152055	chr15	MAN2C1	NA
901	cg21467100	chr10		NA
902	cg03595792	chr11	PGM2L1	NA
903	cg07507263	chr2		NA
904	cg16927435	chrX	LINC00632	NA
905	cg25678231	chr1	ETV3L	Co-MNCog2
906	cg05058748	chr2	SH3BP4	NA
907	cg20446846	chr13	PDS5B	Co-MNCog1
908	cg17194182	chr7	EPO	NA
909	cg14456161	chr10		NA
910	cg05611648	chr2	KLHL30	Co-MNCog1
911	cg17476499	chr12	LRRC23;LRRC23;LRRC23;LRRC23	NA
912	cg23303074	chr4	LRAT	NA
913	cg02693818	chr12		NA
914	cg03288429	chr21	MORC3	Co-MNCog2
915	cg24068655	chr8	LOC101929268	Co-MNCog1
916	cg22153345	chr8	ERICH1	Co-MNCog1
917	cg27538153	chr12	TMEM5;TMEM5	NA
918	cg06222397	chr16		NA
919	cg14871898	chr7		NA
920	cg10016788	chr19	EPS8L1;EPS8L1	NA
921	cg08999752	chr2		NA
922	cg24899571	chr11	JAM3	NA
923	cg05475524	chr11	ACTN3	NA
924	cg02408910	chr10	GRID1	Co-MNCog1
925	cg02933984	chr6	WASF1;WASF1;WASF1;CDC40;WASF1	NA
926	cg05557516	chr14		Co-MNCog2
927	cg16672337	chr19	ZNF98;ZNF98	NA
928	cg19228065	chr15		NA
929	cg09212014	chr14	DLK1	Co-MNCog1
930	cg14215310	chr8		NA
931	cg19358373	chr12		NA
932	cg17728655	chr2	OTOF;OTOF;OTOF;OTOF;OTOF	NA
933	cg10954944	chr3		Co-MNCog2
934	cg14914822	chr18	NEDD4L;NEDD4L;NEDD4L	NA
935	cg07626033	chr3	SLC6A1	NA
936	cg25683989	chr12	HVCN1;HVCN1	Co-MNCog2
937	cg02386403	chr6	FOXF2	NA
938	cg01506299	chr9	C9orf84	NA
939	cg16666529	chr22		NA
940	cg14988083	chr4	FGFR3;FGFR3;FGFR3	NA
941	cg03916787	chr9	RPL35	NA
942	cg23448054	chr19	FAM129C;FAM129C	NA
943	cg21722058	chr4	PLK4;PLK4	NA
944	cg06948187	chr9	FAM219A;FAM219A;FAM219A;FAM219A;FAM219A;FAM219A	Co-MNCog1
945	cg25150440	chr7	CHRM2;CHRM2;CHRM2;CHRM2;CHRM2;CHRM2;CHRM2;CHRM2	NA
946	cg04671559	chr2	MGAT5	Co-MNCog2
947	cg10309835	chr19	KDELR1;KDELR1	NA
948	cg15437651	chr4	INTU	NA
949	cg03504731	chr1	GNPAT	NA
950	cg05574141	chr11		NA
951	cg09607131	chr17	SLC39A11;SLC39A11	NA
952	cg07467604	chr2	CAMKMT	Co-MNCog2
953	cg24544273	chr10	SUFU;SUFU;ACTR1A	NA
954	cg24696500	chr5	LRRC14B	NA
955	cg12885732	chr9	KANK1	Co-MNCog2
956	cg17800428	chr11	PRDM11;PRDM11;PRDM11	Co-MNCog2
957	cg08096656	chr7		NA
958	cg25102614	chr12		Co-MNCog2
959	cg06618047	chr16	LOC146336	NA
960	cg20808234	chr6		NA
961	cg10179251	chr2	ALK	NA
962	cg16493584	chr6	SAMD3	Co-MNCog2
963	cg17481703	chr13		NA
964	ch.2.4958278F	chr2	PASK	Co-MNCog2
965	cg25361506	chr1		Co-MNCog2
966	cg16635550	chr6	STK19;STK19;DOM3Z;STK19	NA
967	cg09382850	chr7	SYPL1;SYPL1	NA
968	cg12173604	chr19	ZSWIM4	Co-MNCog1
969	cg16757332	chr14	SLC24A4;SLC24A4;SLC24A4	Co-MNCog1
970	cg17795240	chr8	GATA4	NA
971	cg04015501	chr13	TUBGCP3	NA
972	cg21399203	chr4		Co-MNCog2
973	cg08430886	chr15	ARNT2;ARNT2	Co-MNCog1
974	cg17513770	chr12	TMEM132D	NA
975	cg07432526	chr15		NA
976	cg04228573	chr17	MAP2K6	NA
977	cg14531540	chr3		Co-MNCog2
978	cg01328305	chr20	PABPC1L	NA
979	cg24793782	chr11		NA
980	cg21803417	chr5	MTRR;MTRR;FASTKD3	NA
981	cg07817266	chr17	MGC57346-CRHR1;MGC57346-CRHR1	NA
982	cg20777378	chr3		NA
983	cg16383222	chr8	CYHR1	NA
984	cg26581001	chr11		NA
985	cg18268962	chr3	CNTN3	Co-MNCog1
986	cg20011940	chr11		NA
987	cg16884042	chr2	SGPP2	NA
988	cg15193282	chr6	RPP21	NA
989	cg26137121	chr8	C8ORFK29	NA
990	cg02397205	chr12	NOS1	Co-MNCog1
991	cg07187855	chr6	DDR1;DDR1	NA
992	cg07139350	chr1	VPS13D;VPS13D	NA
993	cg00844567	chr11		NA
994	cg03879808	chr2		NA
995	cg13182713	chr17	UNK	NA
996	cg23714355	chr2	CLIP4;CLIP4;CLIP4;CLIP4	Co-MNCog2
997	cg09553839	chr10	CBARA1	Co-MNCog2
998	cg21694059	chr22	MYO18B	Co-MNCog2
999	cg01982279	chr14		NA
1000	cg11707733	chr20	PLCG1-AS1;TOP1	NA
1001	cg00595035	chr21	NCAM2	NA
1002	cg08458686	chr8	MTMR7	NA
1003	cg10313149	chr10	ZMIZ1	Co-MNCog1
1004	cg01243513	chr12	DTX3;GEFT	Co-MNCog1
1005	cg04087185	chr1		NA
1006	cg16902600	chr16		NA
1007	cg06151468	chr19	SPTBN4	NA
1008	cg12536361	chr17	C1QTNF1;C1QTNF1;C1QTNF1;C1QTNF1-AS1;C1QTNF1-AS1	Co-MNCog1
1009	cg15939759	chr17		NA
1010	cg23525438	chr6		NA
1011	cg06937654	chr21		NA
1012	cg03898598	chr20		Co-MNCog2
1013	cg02806322	chr3	CMTM7;CMTM7	Co-MNCog2
1014	cg24205914	chr10	RHOBTB1;RHOBTB1	NA
1015	cg13647321	chr17	LOC100128006;ARHGAP44	Co-MNCog1
1016	cg17663727	chr6		NA
1017	cg27243354	chr10	H2AFY2	NA
1018	cg00526276	chr16		NA
1019	cg22551546	chr5		NA
1020	cg20352879	chr3		NA
1021	cg21241017	chr4		NA
1022	cg09381155	chr3	EPHB1	NA
1023	cg04926108	chr1		Co-MNCog2
1024	cg15004915	chr16		NA
1025	cg26993249	chr21	LOC100506403	NA
1026	cg15340845	chr9	PHPT1;PHPT1;PHPT1;PHPT1;PHPT1;PHPT1	NA
1027	cg06354692	chr11	PHRF1	NA
1028	cg26831462	chr1		NA
1029	cg25235661	chr7	SLC25A13;SLC25A13;SLC25A13	Co-MNCog2
1030	cg15103076	chr5	FABP6;FABP6	NA
1031	cg17951978	chr1	HSD3B2;HSD3B2	NA
1032	cg08833255	chr11		NA
1033	cg17930361	chr13	ZIC5	NA
1034	cg21844749	chr8	TUSC3;TUSC3	NA
1035	cg05209330	chr5	P4HA2;P4HA2;P4HA2;P4HA2;P4HA2	Co-MNCog1
1036	cg11523366	chr7	GNA12;GNA12;GNA12;GNA12	Co-MNCog2
1037	cg22317893	chr11	DYNC2H1;DYNC2H1	NA
1038	cg22388472	chr1		NA
1039	cg03350184	chr18	CELF4;CELF4;CELF4;CELF4	Co-MNCog1
1040	cg12071455	chr13	LAMP1	NA
1041	cg14186558	chr9	RNF183	Co-MNCog1
1042	cg01454592	chr3	CCDC36;CCDC36	NA
1043	cg19853638	chr10	SH3PXD2A	Co-MNCog1
1044	cg01452189	chr16	LCMT1;LCMT1	Co-MNCog2
1045	cg24127125	chr15	CRTC3-AS1	Co-MNCog1
1046	cg00124685	chr8		NA
1047	cg16045897	chr18	FHOD3	Co-MNCog1
1048	cg06001484	chr8		Co-MNCog2
1049	cg01487433	chr19	CILP2	NA
1050	cg15469655	chr3	SUSD5	Co-MNCog1
1051	cg19826284	chr12	MRPS35;MRPS35	NA
1052	cg22871908	chr1		NA
1053	cg02382320	chr5	SLC12A7	NA
1054	cg21364111	chr13	EDNRB;EDNRB;EDNRB	NA
1055	cg03207121	chr7	MAFK	NA
1056	cg18190506	chr10		NA
1057	cg07713194	chr17		NA
1058	cg13320683	chr10	RHOBTB1;RHOBTB1	NA
1059	cg18193440	chr9	TAF1L	NA
1060	cg11641370	chr8	FOXH1	NA
1061	cg12600749	chr7	PTPRN2;PTPRN2;PTPRN2	Co-MNCog2
1062	cg00976081	chr1	TGFBR3;TGFBR3;TGFBR3;TGFBR3	Co-MNCog2
1063	cg17441123	chr13	HS6ST3	NA
1064	cg05563595	chr6	TRIM15	NA
1065	cg12823408	chr11	ARHGEF12	NA
1066	cg13898845	chr6	UNC5CL	NA
1067	cg05556923	chr7	PDGFA;PDGFA	Co-MNCog1
1068	cg07311033	chr2	ACOXL	NA
1069	cg00904483	chr10	MGMT	Co-MNCog1
1070	cg08802533	chr2	DPYSL5	NA
1071	cg07074042	chr22	RNF215	Co-MNCog1
1072	cg17018661	chr11	BRSK2	NA
1073	cg15988843	chr1		NA
1074	cg14354906	chr7		NA
1075	cg20858400	chr14		NA
1076	cg26286043	chr13		NA
1077	cg02353522	chr12	POLE	Co-MNCog2
1078	cg17639290	chr11	TIMM8B;SDHD;TIMM8B	NA
1079	cg11567758	chr17		Co-MNCog2
1080	cg19077806	chr2	PDE1A;PDE1A	Co-MNCog1
1081	cg04238097	chr11		NA
1082	cg15377731	chr11		NA
1083	cg21148871	chr4	LOC101929064;MAPK10;MAPK10;MAPK10	NA
1084	cg02349785	chr11	CST6	NA
1085	cg05036100	chr7	ST7OT3;ST7;ST7	NA
1086	cg18638118	chr7		NA
1087	cg07957661	chr16		NA
1088	cg07264323	chr1	DAB1	Co-MNCog1
1089	cg17977546	chr17		NA
1090	cg04833007	chr7	LEP	Co-MNCog1
1091	cg07247409	chr1	COL24A1	NA
1092	cg27108109	chr4	HOPX;HOPX;HOPX	Co-MNCog2
1093	cg16856695	chr5	ZBED3	NA
1094	cg24137322	chr4	SHROOM3	Co-MNCog1
1095	cg24414276	chr14		NA
1096	cg10131095	chr10	RNLS;RNLS	NA
1097	cg21385047	chr1	S1PR1	NA
1098	cg21161194	chr9		NA
1099	cg09993189	chr8		NA
1100	cg16005240	chr11		NA
1101	cg00133966	chr2		NA
1102	cg06038201	chr11	RNASEH2C	NA
1103	cg21735714	chr9	C9orf21	NA
1104	cg21151960	chr5	EXOC3;C5orf55	NA
1105	cg07531549	chr8	PLEC1;PLEC1;PLEC1;PLEC1;PLEC1;PLEC1;PLEC1;PLEC1	NA
1106	cg16032108	chr11		NA
1107	cg07895681	chr1		NA
1108	cg01267797	chr5	SERINC5	Co-MNCog2
1109	cg25256259	chr10	TSPAN15	Co-MNCog1
1110	cg12401086	chr1	NFIA-AS2;NFIA-AS2	NA
1111	cg11105339	chr9		NA
1112	cg01495918	chr2		Co-MNCog2
1113	cg07121165	chr9		NA
1114	cg04391716	chr10		NA
1115	cg01951617	chr2		NA
1116	cg04568923	chr17	COX10	NA
1117	cg06382344	chr2	TBR1	NA
1118	cg19215233	chr1	ECE1	NA
1119	cg13926377	chr4	ADD1;ADD1;ADD1;ADD1;ADD1	Co-MNCog2
1120	cg00755753	chr16	C16orf80	NA
1121	cg16358696	chr15		NA
1122	cg10218490	chr7		NA
1123	cg04752891	chr7	MKLN1	Co-MNCog1
1124	cg19760965	chr3	C3orf21	Co-MNCog2
1125	cg22255799	chr4	RUFY3;RUFY3;RUFY3;RUFY3;RUFY3	Co-MNCog2
1126	cg16891376	chr19	FLT3LG	Co-MNCog2
1127	cg07730360	chr3		Co-MNCog2
1128	cg03141489	chr17	RBFOX3	NA
1129	cg00580256	chr15	TM6SF1;TM6SF1	Co-MNCog1
1130	cg03043972	chr22		Co-MNCog2
1131	cg14799087	chr12	SFSWAP;SFSWAP	Co-MNCog2
1132	cg27080019	chr22		NA
1133	cg15369890	chr10	MYOF;MYOF	NA
1134	cg21911021	chr19	ZIK1	NA
1135	cg07444731	chr12	PLEKHG6;PLEKHG6;PLEKHG6	NA
1136	cg17049833	chr17		NA
1137	cg22660171	chr8		NA
1138	cg06142740	chr2	PPP1CB;PPP1CB	NA
1139	cg20650366	chr15	NR2F2-AS1;NR2F2-AS1	NA
1140	cg12334180	chr7	CHN2;CPVL;CPVL	NA
1141	cg11700456	chr12	ADIPOR2	NA
1142	cg18560571	chr14	CCDC88C	NA
1143	cg05728756	chr14		Co-MNCog2
1144	cg00898147	chr14	SALL2	NA
1145	cg21638374	chr5	FBXO38;FBXO38	NA
1146	cg00973942	chr17		NA
1147	cg05732278	chr22	L3MBTL2	NA
1148	cg15089097	chr5	CENPH	NA
1149	cg12209487	chr3	TF	Co-MNCog1
1150	cg08695416	chr2		NA
1151	cg14546153	chr20	APCDD1L	NA
1152	cg04686790	chr10	C10orf114;C10orf114;MIR1915	NA
1153	cg13147740	chr1		NA
1154	cg00480298	chr17	MAPT;MAPT;MAPT;MAPT;MAPT;MAPT	NA
1155	cg06077003	chr1	CAMTA1	Co-MNCog1
1156	cg00444906	chr1	EDEM3	Co-MNCog2
1157	cg02420128	chr11	ST5;ST5;ST5	Co-MNCog2
1158	cg12804283	chr1	FMN2	NA
1159	cg24564434	chr17	AZI1;AZI1	NA
1160	cg16895370	chr19	ZNF781	NA
1161	cg15364784	chr14	DCAF11;DCAF11;DCAF11;DCAF11;DCAF11;DCAF11	NA
1162	cg21913626	chr2	VWA3B	NA
1163	cg00858665	chr15		NA
1164	cg20370783	chr2	NPAS2	Co-MNCog1
1165	cg09831796	chr8	SYBU;SYBU;SYBU;SYBU	NA
1166	cg20555284	chr1	GATAD2B	NA
1167	cg07540597	chr9	AK8;C9orf9;C9orf9	NA
1168	cg24725384	chr22		Co-MNCog2
1169	cg24603203	chr1	LOC102723833;LOC102723833;USH2A	Co-MNCog1
1170	cg03593908	chr13		NA
1171	cg23155853	chr2	PDIA6;PDIA6;PDIA6;PDIA6;PDIA6	NA
1172	cg18623476	chr6	TSPYL4;TSPYL4	Co-MNCog1
1173	cg04074153	chr12		NA
1174	cg06277784	chr19	ZNF98	NA
1175	cg08681473	chr17	COL1A1	Co-MNCog1
1176	cg09999998	chr22	SEZ6L;SEZ6L;SEZ6L;SEZ6L;SEZ6L;SEZ6L	Co-MNCog1
1177	cg26702001	chr16	ZNF213;ZNF213;ZNF213	NA
1178	cg10929447	chr16	FBXO31;FBXO31	NA
1179	cg27139783	chr3	HEG1	NA
1180	cg06529416	chr10		NA
1181	cg09952366	chr16	PDXDC2	NA
1182	cg19736397	chr7		NA
1183	cg01290934	chr6		NA
1184	cg16995768	chr7	PTPRN2;PTPRN2;PTPRN2	NA
1185	cg04532515	chr17	MYO18A;MYO18A;TIAF1;TIAF1	NA
1186	cg10449558	chr17		NA
1187	cg06622996	chr6	C6orf106;C6orf106	Co-MNCog2
1188	cg06964858	chr19	JUNB;JUNB	NA
1189	cg14110111	chr9	GLIS3	NA
1190	cg04759376	chr10		Co-MNCog2
1191	cg06007071	chr16	IFT140	Co-MNCog1
1192	cg09959020	chr20	SOGA1;SOGA1	Co-MNCog1
1193	cg19180542	chr10	ZNF37B	NA
1194	cg08455936	chr16	KIAA0556	Co-MNCog1
1195	cg11964145	chr2		Co-MNCog2
1196	cg03098589	chr10	VTI1A	Co-MNCog2
1197	cg03599110	chr21	DIP2A;DIP2A;DIP2A;DIP2A;DIP2A;DIP2A;DIP2A	NA
1198	cg16640730	chr7	EXOC4	Co-MNCog2
1199	cg06326072	chr11	DLAT	NA
1200	cg02105458	chr15		NA
1201	cg13089044	chr6	NOTCH4	NA
1202	cg14691530	chr16		NA
1203	cg15922088	chr2	CFLAR;CFLAR;CFLAR;CFLAR;CFLAR;CFLAR	NA
1204	cg01420517	chr1	ETNK2;ETNK2;ETNK2;ETNK2	Co-MNCog1
1205	cg00322993	chr9		NA
1206	cg04561571	chr12	UBE2N	NA
1207	cg13228576	chr2	ASB18	NA
1208	cg14625801	chr1	ADGRB2;ADGRB2	Co-MNCog2
1209	cg14505490	chr16		NA
1210	cg25246246	chr17	ARHGAP27	Co-MNCog2
1211	cg06219592	chr1	SNHG3-RCC1;SNHG3-RCC1;SNHG3-RCC1;RCC1;RCC1;RCC1	NA
1212	cg06592260	chr8	EPPK1	NA
1213	cg15650161	chr10	PCDH21	Co-MNCog1
1214	cg04837309	chr7	CUX1;CUX1;CUX1	NA
1215	cg01062126	chr16	SNRNP25;POLR3K	NA
1216	cg11855061	chr16	SEPHS2;SEPHS2	NA
1217	cg06308109	chr6	SNORD32B	Co-MNCog1
1218	cg15580167	chr2	CHRNA1;CHRNA1	Co-MNCog1
1219	cg17223590	chr19	LOC100420587	Co-MNCog1
1220	cg21195235	chr18	KATNAL2	NA
1221	cg01217578	chr16	ST3GAL2	NA
1222	cg23479742	chr19	CILP2	Co-MNCog2
1223	cg01395659	chr5	NSUN2;SRD5A1	NA
1224	cg03721454	chr21	SLC19A1	NA
1225	cg03898320	chr2	KLF7;KLF7;KLF7;KLF7;KLF7	NA
1226	cg27401095	chr19	ZNF324	NA
1227	cg26454412	chr9		NA
1228	cg04548815	chr1	VANGL1	NA
1229	cg25263912	chr17	NATD1	NA
1230	cg00290023	chr5		NA
1231	cg13731776	chr9	PSMB7	Co-MNCog2
1232	cg25622493	chr8	TRAPPC9;TRAPPC9	Co-MNCog1
1233	cg20645656	chr2		Co-MNCog2
1234	cg24286200	chr7	TBXAS1;TBXAS1	Co-MNCog1
1235	cg12106181	chr15		Co-MNCog2
1236	cg27144115	chr5	C5orf38	NA
1237	cg21751023	chr7	FSCN3	Co-MNCog1
1238	cg07723948	chr16	OSGIN1;OSGIN1;OSGIN1	NA
1239	cg13488811	chr11		Co-MNCog2
1240	cg01352758	chr3		NA
1241	cg07312610	chr2		NA
1242	cg14267780	chr11	HCCA2;KRTAP5-4	NA
1243	cg08453968	chr20	NXT1	NA
1244	cg21214294	chr7		NA
1245	cg16934120	chr8		Co-MNCog2
1246	cg10757780	chr9	LAMC3	Co-MNCog1
1247	cg16185419	chr11		NA
1248	cg20378131	chr17	COL1A1	Co-MNCog1
1249	cg07242214	chr8	EIF2C2;EIF2C2	NA
1250	cg16973111	chr18	DLGAP1;DLGAP1;DLGAP1;DLGAP1;DLGAP1;DLGAP1;DLGAP1;DLGAP1;DLGAP1	Co-MNCog1
1251	cg19359072	chr15	CYP19A1;CYP19A1	Co-MNCog1
1252	cg15553814	chr1	DAB1	Co-MNCog1
1253	cg11216845	chr6	ZNRD1;ZNRD1;NCRNA00171	NA
1254	cg11743503	chr10	PLCE1-AS1;PLCE1;PLCE1;PLCE1	NA
1255	cg23475135	chr2	ESPNL	Co-MNCog1
1256	cg10386598	chr4		Co-MNCog2
1257	cg09646578	chr8		NA
1258	cg02201052	chr11	PLEKHB1;PLEKHB1;PLEKHB1;PLEKHB1	NA
1259	cg23169512	chr15		NA
1260	cg00183639	chr20		NA
1261	cg02973012	chr5		NA
1262	cg03322922	chr20	SAMD10	NA
1263	cg00829438	chr9	MED22;MED22	NA
1264	cg11632529	chr19	PPP2R1A	NA
1265	cg14841601	chr4		Co-MNCog2
1266	cg07515989	chr1		NA
1267	cg24336985	chr3	WNT7A	NA
1268	cg14303187	chr9	SHC3	Co-MNCog1
1269	cg10628153	chr5		NA
1270	cg22589697	chr5	ZNF608	Co-MNCog1
1271	cg09869171	chr3		NA
1272	cg17545141	chr7	MAD1L1;MAD1L1;MAD1L1	NA
1273	cg11183307	chr20	SCRT2	NA
1274	cg26885345	chr2		NA
1275	cg18797504	chr18	DLGAP1;DLGAP1;DLGAP1;DLGAP1;DLGAP1;DLGAP1;DLGAP1;DLGAP1;DLGAP1	Co-MNCog1
1276	cg03645750	chr18	APCDD1	Co-MNCog1
1277	cg07114024	chr15	BAHD1	NA
1278	cg22444124	chr1	ITPKB	NA
1279	cg15237757	chr18		NA
1280	cg00836272	chr3	ARHGEF3	Co-MNCog1
1281	cg09015385	chr6	NCOA7;NCOA7;NCOA7;NCOA7;NCOA7;NCOA7	NA
1282	cg15733309	chr7	PTPRN2;PTPRN2;PTPRN2	NA
1283	cg19186307	chr4	C4orf23	Co-MNCog1
1284	cg13515674	chr4	HMGB2;HMGB2;HMGB2	NA
1285	cg05903881	chr4		NA
1286	cg17331334	chr1		NA
1287	cg03589030	chr8		NA
1288	cg19643467	chr22	SLC5A4	NA
1289	cg27560629	chr12	ACADS;ACADS	NA
1290	cg13970526	chr10		NA
1291	cg05938888	chr1		Co-MNCog2
1292	cg24867566	chr13	MTMR6	NA
1293	cg06130354	chr17	RNF167	NA
1294	cg24713204	chr19	ZNF471	NA
1295	cg11321092	chr5		NA
1296	cg10788301	chr17	SPNS2	Co-MNCog2
1297	cg15092703	chr10		NA
1298	cg02847037	chr13	ZDHHC20	NA
1299	cg17178435	chr5	AFF4	Co-MNCog2
1300	cg06723421	chr1	SLC45A1	Co-MNCog1
1301	cg01801290	chr10	LBX1-AS1;LBX1	NA
1302	cg05770446	chr12		NA
1303	cg26841929	chr22	TRABD	NA
1304	cg15276628	chr8	ANK1;ANK1;ANK1;ANK1;ANK1	NA
1305	cg26215399	chr8	FAM160B2	NA
1306	cg01414726	chr8	TRPA1	NA
1307	cg13866994	chr5	GFPT2	Co-MNCog1
1308	cg11736942	chr14	C14orf180	NA
1309	cg27118968	chr3	C3orf57	NA
1310	cg14707627	chr17		NA
1311	cg14191454	chr18	DSC1;DSC1	Co-MNCog2
1312	cg00816182	chr7		NA
1313	cg17283857	chr10	FLJ41350;LBX1	NA
1314	cg26477711	chr12		NA
1315	cg20510213	chr6	ATP6V1G2;NFKBIL1;NFKBIL1;NFKBIL1;ATP6V1G2;NFKBIL1;NFKBIL1;NFKBIL1	NA
1316	cg21387604	chr1	TGFB2;TGFB2	Co-MNCog2
1317	cg15704155	chr2	C2orf50	NA
1318	cg01273232	chr15		NA
1319	cg03340191	chr12	MYL2	NA
1320	cg07149809	chr6		NA
1321	cg09851121	chr8		NA
1322	cg10958340	chr11	ADAMTS8;ADAMTS8	Co-MNCog1
1323	cg21959781	chr2		NA
1324	cg00252803	chr8		NA
1325	cg26272623	chr1	TBX15	NA
1326	cg16527441	chr11	DKFZp761E198	NA
1327	cg22281721	chr21	ADARB1;ADARB1;ADARB1;ADARB1;ADARB1;ADARB1;ADARB1;ADARB1	Co-MNCog2
1328	cg13537781	chr17		NA
1329	cg04416045	chr17		NA
1330	cg00107028	chr5	STARD4-AS1	NA
1331	cg16902078	chr7	KCCAT333;KCCAT333	Co-MNCog2
1332	cg22790835	chr13	C13orf29	Co-MNCog1
1333	cg14524764	chr22	MICALL1	Co-MNCog2
1334	cg13606495	chr14		NA
1335	cg21574430	chr9		NA
1336	cg24356337	chr5	KIAA0825	Co-MNCog2
1337	cg11857238	chr6	TRIM10;TRIM10	NA
1338	cg15217061	chr1		NA
1339	cg23468890	chr2	METTL21A;METTL21A;METTL21A	NA
1340	cg13215456	chr2		NA
1341	cg10634032	chr3		NA
1342	cg22687244	chr15	FAM81A	NA
1343	cg05313263	chr14	WDR25;WDR25	NA
1344	cg14809015	chr15	ZFAND6;ZFAND6;ZFAND6;ZFAND6;ZFAND6;ZFAND6;ZFAND6	NA
1345	cg19800032	chr7		NA
1346	cg12089656	chr2	NCK2;NCK2	NA
1347	cg17427856	chr6	CASP8AP2;CASP8AP2;CASP8AP2	NA
1348	cg19433807	chr15	GCHFR	Co-MNCog2
1349	cg10494844	chr9	CERCAM;MIR1268A	NA
1350	cg05234681	chr21		Co-MNCog2
1351	cg01667634	chr6	EHMT2;EHMT2	Co-MNCog2
1352	cg04900856	chr19	TNFSF9	NA
1353	cg01176776	chr17	TEKT3	NA
1354	cg22309983	chr17	TRPV1;TRPV1;TRPV1;TRPV1	NA
1355	cg05932799	chr19	MPV17L2	Co-MNCog1
1356	cg03575512	chr5		NA
1357	cg19904126	chr22	MED15;MED15;MED15;MED15;MED15;MED15	Co-MNCog2
1358	cg00806239	chr6	TJAP1;TJAP1;TJAP1;TJAP1;TJAP1;TJAP1;TJAP1	NA
1359	cg17702164	chr20	PSMF1;PSMF1	NA
1360	cg16004548	chr11	KDM2A;KDM2A	NA
1361	cg16676413	chr7	STX1A;STX1A	NA
1362	cg26110064	chr1		Co-MNCog2
1363	cg11667076	chr7	HIPK2;HIPK2	NA
1364	cg07668358	chr1		Co-MNCog2
1365	cg09633081	chr6		NA
1366	cg19458812	chr12		NA
1367	cg24075966	chr6	CCHCR1;CCHCR1;TCF19;TCF19;CCHCR1	NA
1368	cg15540533	chr3		NA
1369	cg15851931	chr3	CRELD1;CRELD1;CRELD1	Co-MNCog1
1370	cg11530006	chr15		NA
1371	cg07898057	chr1	TAF12;TAF12	NA
1372	cg18602721	chr2	FRZB	NA
1373	cg13935480	chr1	WNT3A	Co-MNCog1
1374	cg13222920	chr21		NA
1375	cg02051290	chr22	SERHL2	NA
1376	cg22114498	chr11	KAT5;KAT5;KAT5	NA
1377	cg10390305	chr15		NA
1378	cg26996890	chr7	MAD1L1;MAD1L1;MAD1L1	NA
1379	cg05037024	chr5	SGCD;SGCD;SGCD	NA
1380	cg05007486	chr19		NA
1381	cg03138318	chr15	ANPEP;ANPEP	Co-MNCog1
1382	cg16603669	chr15	DUT;DUT;DUT	NA
1383	cg27196695	chr10	INPP5A	NA
1384	cg09509952	chr10		NA
1385	cg10061865	chr14	ATP5S;ATP5S;ATP5S;ATP5S;L2HGDH	NA
1386	cg21757178	chr6		Co-MNCog2
1387	cg19567415	chr17	TANC2	Co-MNCog1
1388	cg09903158	chr3		NA
1389	cg11247817	chr5	LNPEP;LNPEP;LNPEP	Co-MNCog2
1390	cg27199827	chr20	DTD1	NA
1391	cg08026144	chr9	PCSK5	NA
1392	cg03082218	chr12	FBXW8;FBXW8	Co-MNCog2
1393	cg27109748	chr7	MAD1L1;MAD1L1;MAD1L1	Co-MNCog1
1394	cg17696044	chr11	SHANK2;SHANK2	Co-MNCog2
1395	cg19950097	chr12		NA
1396	cg26484090	chr6	USP45	NA
1397	cg02651824	chr16	WDR24	NA
1398	cg11664516	chr15	TLN2;TLN2	Co-MNCog1
1399	cg19140314	chr16	LOC100131303	NA
1400	cg01757206	chr17	SLC2A4	NA
1401	cg00776327	chr14	G2E3	NA
1402	cg08826925	chr20		NA
1403	cg13393276	chr11	BTBD10;BTBD10	NA
1404	cg19142054	chr18	CETN1	Co-MNCog1
1405	cg20400017	chr9		NA
1406	cg18362330	chr5	NEUROG1	NA
1407	cg27220401	chr12	HDAC7;HDAC7	Co-MNCog2
1408	cg10403028	chr2	TEX41	NA
1409	cg06443973	chr12	KIAA1033	NA
1410	cg06901759	chr20		NA
1411	cg06241292	chr3	USP4;USP4;C3orf62	NA
1412	cg15805490	chr19		NA
1413	cg10659365	chr19		Co-MNCog2
1414	cg15119262	chr11	SHANK2	NA
1415	cg15949396	chr8		NA
1416	cg22437240	chr2		NA
1417	cg13625816	chr8	RAB11FIP1;RAB11FIP1	NA
1418	cg13481250	chr12	ARL1;ARL1	Co-MNCog1
1419	cg20658779	chr8		NA
1420	cg07864639	chr4	PPP2R2C;PPP2R2C	Co-MNCog1
1421	cg02900034	chr8	HSF1	NA
1422	cg10651669	chr15		NA
1423	cg12647423	chr3	IL17RD;IL17RD	Co-MNCog1
1424	cg17091577	chr6	DDR1;DDR1	NA
1425	cg00115984	chr9	TOPORS	NA
1426	cg27225571	chr6	MRPL18;TCP1;TCP1	NA
1427	cg16178289	chr17		NA
1428	cg02411663	chr12		Co-MNCog2
1429	cg26612799	chr1	RYR2	NA
1430	cg26976687	chr5		NA
1431	cg24714561	chr14	FOXN3	NA
1432	cg08382977	chr1		Co-MNCog2
1433	cg01638284	chr17		NA
1434	cg12283302	chr20		NA
1435	cg02876129	chr14		NA
1436	cg14203525	chr3	GAP43;GAP43	NA
1437	cg08682532	chr15	ISLR2;ISLR2;ISLR2;ISLR2	NA
1438	cg02074797	chr9	PHF2	Co-MNCog1
1439	cg20536337	chr9		NA
1440	cg03841598	chr7	LINC01447	Co-MNCog1
1441	cg16469463	chr14	ASPG	Co-MNCog1
1442	cg18458131	chr8	TSPYL5;TSPYL5	NA
1443	cg20184887	chr17	NCOR1	NA
1444	cg26393016	chr6	LOC285830;LOC285830	NA
1445	cg24251426	chr11	BTG4	Co-MNCog2
1446	cg22274745	chr2	CERKL;CERKL;CERKL;CERKL;CERKL;CERKL;CERKL	NA
1447	cg18213979	chr17	RNF135;RNF135	NA
1448	cg03341758	chr20	RBM39;RBM39	NA
1449	cg04368843	chr20	ADAM33;ADAM33	Co-MNCog1
1450	cg02665463	chr17	ARL17A;ARL17A	NA
1451	cg19093297	chr20	DNMT3B;DNMT3B;DNMT3B;DNMT3B;DNMT3B	Co-MNCog1
1452	cg17983632	chr6		NA
1453	cg00560547	chr16	CA7;CA7	NA
1454	cg11025437	chr11		NA
1455	cg25010192	chr21	AGPAT3	NA
1456	cg25295510	chr19	SIPA1L3;SIPA1L3	Co-MNCog1
1457	cg08595490	chr1	ZNF691	NA
1458	cg27082285	chr10	CTNNA3;CTNNA3;CTNNA3	NA
1459	cg10316527	chr15		NA
1460	cg08135764	chr1	RASAL2;RASAL2	Co-MNCog1
1461	cg17675715	chr12	SRGAP1	NA
1462	cg26140020	chr8	C8orf31	NA
1463	cg12158389	chr1	EPHA10;EPHA10	NA
1464	cg09656639	chr7	PTPRN2;PTPRN2;PTPRN2;PTPRN2;PTPRN2	Co-MNCog2
1465	cg00508771	chr2	SCN2A;SCN2A;SCN2A	Co-MNCog1
1466	cg08792701	chr12		Co-MNCog2
1467	cg05735782	chr17		NA
1468	cg00939910	chr12		NA
1469	cg03636968	chr11	SCN3B;SCN3B	NA
1470	cg08607082	chr19	ICAM1	NA
1471	cg11747081	chr13		NA
1472	cg16144395	chr18		Co-MNCog2
1473	cg01137941	chr16	ADCY7	Co-MNCog2
1474	cg16311302	chr11		NA
1475	cg21263196	chr19	BCAM;BCAM	NA
1476	cg09721144	chr10	RNLS;RNLS	Co-MNCog2
1477	cg01119319	chr7		NA
1478	cg09663566	chr15	FEM1B	Co-MNCog2
1479	cg17055322	chr3		NA
1480	cg19147112	chr1	NKAIN1	Co-MNCog1
1481	cg26824947	chr5	SLC12A7	NA
1482	cg26989531	chr12	CCND2;CCND2	NA
1483	cg22517995	chr19	ZNF382;ZNF529;ZNF529;ZNF529	NA
1484	cg00766535	chr6		NA
1485	cg00575674	chr1		NA
1486	cg01363734	chr12	TESC;TESC;TESC	NA
1487	cg23018548	chr17	MIR548W	NA
1488	cg19260376	chr1	PEAR1	NA
1489	cg07672104	chr8	SMIM19;SMIM19;SMIM19;SLC20A2;SMIM19;SLC20A2	Co-MNCog2
1490	ch.16.785175F	chr16	HS3ST4	NA
1491	cg19635475	chr13		NA
1492	cg07548381	chr7	SRRT;SRRT;SRRT;SRRT	NA
1493	cg10489428	chr15	C15orf29	NA
1494	cg18202614	chr5		NA
1495	cg08186892	chr16	CMIP;CMIP	NA
1496	cg06182503	chr6	SLC17A3;SLC17A3	Co-MNCog1
1497	cg08266275	chr10	PARD3;PARD3;PARD3;PARD3;PARD3;PARD3;PARD3;PARD3;PARD3;PARD3;PARD3	NA
1498	cg14063843	chr1	AGL;AGL;AGL;AGL;AGL;AGL	Co-MNCog2
1499	cg17930068	chr21		NA
1500	cg15194943	chr18	ADCYAP1;ADCYAP1	NA
1501	cg18371471	chr14	BEGAIN;BEGAIN	Co-MNCog1
1502	cg06802474	chr2		NA
1503	cg17892736	chr22		NA
1504	cg23963595	chr11	MTMR2;MTMR2;MTMR2;MTMR2;MTMR2;MTMR2;MTMR2	NA
1505	cg12502262	chr8	FER1L6;FER1L6-AS1	Co-MNCog1
1506	cg18085176	chr4	AFAP1;AFAP1	NA
1507	cg05228810	chr1	TRIM67;TRIM67	Co-MNCog1
1508	cg04499701	chr11		NA
1509	cg08373023	chr17	AATK	Co-MNCog1
1510	cg16534427	chr14	FLJ10357	Co-MNCog1
1511	cg15254064	chr11	SHANK2	NA
1512	cg24383507	chr10	KCNIP2;KCNIP2;KCNIP2;KCNIP2;KCNIP2;KCNIP2;KCNIP2	NA
1513	cg16252933	chr10	CCDC6	NA
1514	cg00599151	chr20	PHACTR3;PHACTR3;PHACTR3;PHACTR3;PHACTR3;PHACTR3	Co-MNCog1
1515	cg01064979	chr22	CSF2RB	Co-MNCog2
1516	cg26184142	chr19	MIDN	NA
1517	cg22551432	chr6		NA
1518	cg01989908	chr19	NFIX	NA
1519	cg15561493	chr7	VWDE	NA
1520	cg05946942	chr11	NAV2	Co-MNCog1
1521	cg22660596	chr20		NA
1522	cg26824847	chr11	OPCML;OPCML	NA
1523	cg19859335	chr2	MXD1	NA
1524	cg05452174	chr11		NA
1525	cg14450766	chr6	SLC22A2	NA
1526	cg05750447	chr11	LDLRAD3;LDLRAD3;LDLRAD3	NA
1527	cg20417211	chr12	DYRK4;DYRK4;DYRK4	Co-MNCog1
1528	cg11801086	chr6	KIF6;KIF6;KIF6	Co-MNCog2
1529	cg06601131	chr8	DPYSL2;DPYSL2;DPYSL2	Co-MNCog1
1530	cg03626195	chr9		NA
1531	cg25000696	chr7	PTPRN2;PTPRN2;PTPRN2	NA
1532	cg21152351	chr6		NA
1533	cg11592094	chr15	C15orf59;C15orf59	NA
1534	cg12441358	chr12	TUBA1A	NA
1535	cg07481274	chr22	YWHAH	Co-MNCog2
1536	cg04755220	chr19	NUMBL	Co-MNCog2
1537	cg22067988	chr6	TFEB;TFEB;TFEB;TFEB;TFEB	NA
1538	cg20307171	chr2	ANKRD44;ANKRD44	NA
1539	cg07584516	chr13	VWA8	Co-MNCog2
1540	cg24695394	chr1	RRNAD1;RRNAD1	NA
1541	cg25704555	chr14		NA
1542	cg14035828	chr1		NA
1543	cg17009510	chr6	MTHFD1L;MTHFD1L;MTHFD1L	Co-MNCog2
1544	cg17095915	chr9		NA
1545	cg14914442	chr10	SH2D4B;SH2D4B	Co-MNCog2
1546	cg19286672	chr17	SGCA;SGCA	Co-MNCog1
1547	cg23531792	chr19	SLC44A2;SLC44A2	Co-MNCog2
1548	cg04897900	chr3		NA
1549	cg10010004	chr16	KCTD19;LRRC36	NA
1550	cg08864944	chr1	PBX1	Co-MNCog2
1551	cg02045971	chr3	PRR23B	NA
1552	cg09786420	chr1	ADAR	Co-MNCog2
1553	cg13375718	chr1		NA
1554	cg00966686	chr19	MAP2K2	NA
1555	cg11390443	chr1	ROR1;ROR1	Co-MNCog1
1556	cg13302864	chr3	QARS;QARS;QARS	NA
1557	cg13568432	chr8		NA
1558	cg09735674	chr16	ZDHHC7;ZDHHC7	NA
1559	cg02175062	chrX	PRRG1;PRRG1;PRRG1;PRRG1;PRRG1	NA
1560	cg00539654	chr4	EGF;EGF;EGF	NA
1561	cg11245989	chr2		NA
1562	cg22576165	chr10		NA
1563	cg09739014	chr15	APBA2;APBA2	NA
1564	cg08491721	chr11		NA
1565	cg24835190	chr3	SLC6A6;SLC6A6;SLC6A6;SLC6A6	Co-MNCog1
1566	cg19133921	chr21		NA
1567	cg03973866	chr1	ZBTB17	NA
1568	cg19736604	chr6	TNXB	NA
1569	cg04547469	chr20		NA
1570	cg05256688	chr19	WIZ	Co-MNCog1
1571	cg26717280	chr5	UNC5A	NA
1572	cg16902958	chr16	MIR6772;KIFC3;KIFC3;KIFC3	NA
1573	cg21414595	chr12		NA
1574	cg19456812	chr5	ARHGAP26;ARHGAP26	Co-MNCog2
1575	cg26229538	chr11		NA
1576	cg10330673	chr11	CYB561A3;CYB561A3;CYB561A3;CYB561A3	Co-MNCog2
1577	cg17738778	chr7	AMZ1;AMZ1	NA
1578	cg14567593	chr19	IER2	NA
1579	cg14503564	chr4	LDB2;LDB2	NA
1580	cg00676833	chr10		NA
1581	cg25616787	chr1	SPSB1	Co-MNCog1
1582	cg17935175	chr13	MTUS2;MTUS2	Co-MNCog1
1583	cg21079003	chr15	RGMA;RGMA;RGMA;RGMA;RGMA;RGMA	NA
1584	cg04064611	chr7	SBDSP;SBDSP;SBDSP;TYW1B;SBDSP;TYW1B	NA
1585	cg26065488	chr3	TNIK;TNIK;TNIK;TNIK;TNIK;TNIK;TNIK;TNIK;TNIK	NA
1586	cg19187191	chr8	FZD3;FZD3	Co-MNCog1
1587	cg26938497	chr9	GGTA1P;GGTA1P	Co-MNCog2
1588	cg23376446	chr14		NA
1589	cg13879483	chr12	USP44;USP44	NA
1590	cg16046891	chr1	KCNA2	Co-MNCog1
1591	cg12728020	chr1		NA
1592	cg08831252	chr22		NA
1593	cg23512231	chr17		Co-MNCog2
1594	cg06900650	chr2	TUBA3E	Co-MNCog1
1595	cg22692281	chr6	TRIM40	NA
1596	cg12788400	chr6		NA
1597	cg01858394	chr20	SNPH	Co-MNCog1
1598	cg10217953	chr8	MTFR1;MTFR1	NA
1599	cg14083554	chr9	AGPAT2;AGPAT2	Co-MNCog1
1600	cg24657461	chr6		NA
1601	cg09259037	chr6	TBX18	NA
1602	cg11495966	chr4	ART3	Co-MNCog1
1603	cg06890522	chr17	RNASEK;C17orf49;C17orf49;C17orf49	NA
1604	cg06667178	chr3	ZNF445	NA
1605	cg10361696	chr12	FAM109A	NA
1606	cg24473663	chr3	DNASE1L3;DNASE1L3	Co-MNCog1
1607	cg07873154	chr6	TRIM10;TRIM10	NA
1608	cg14010015	chr20	SIGLEC1	Co-MNCog1
1609	cg09222287	chr3	ALCAM	NA
1610	cg09738429	chr12	PYROXD1	NA
1611	cg12320351	chr6	HIVEP2	Co-MNCog2
1612	cg26328924	chr14		NA
1613	cg25067210	chr7		Co-MNCog2
1614	cg03012946	chr10	BTBD16	NA
1615	cg20516262	chr7	CNPY1	NA
1616	cg07972114	chr2		NA
1617	cg12848639	chr5	SLC6A3	NA
1618	cg08390696	chr13	SLC15A1	NA
1619	cg15256195	chr1		NA
1620	cg07737363	chr3	TKT;TKT;TKT;TKT	Co-MNCog2
1621	cg21255657	chr17	CANT1;CANT1;CANT1	NA
1622	cg12755749	chr20	SOGA1;SOGA1	NA
1623	cg05735590	chr6		NA
1624	cg13636867	chr15	DIS3L;DIS3L	NA
1625	cg12571241	chr10	C10orf76	NA
1626	cg13235721	chr7	CUX1;CUX1;CUX1;CUX1;CUX1;CUX1;CUX1	NA
1627	cg14798803	chr4	KIAA0922;KIAA0922	NA
1628	cg08576623	chr6	BRPF3	NA
1629	cg15376531	chr16	MTHFSD;MTHFSD;MTHFSD;MTHFSD;MTHFSD;MTHFSD;MTHFSD	NA
1630	cg05603985	chr1	SKI	NA
1631	cg00391696	chr11	NEAT1	NA
1632	cg15030196	chr1		NA
1633	cg00703481	chr20	ZNF217	NA
1634	cg18207133	chr14	JPH4;JPH4	Co-MNCog1
1635	cg12159502	chr10	SIRT1;SIRT1	NA
1636	cg13801291	chr8	LOC101927066	Co-MNCog1
1637	cg22070462	chr2	FAM59B	NA
1638	cg02907982	chr12	ADGRD1	Co-MNCog2
1639	cg16980761	chr15	GABRG3;GABRG3	NA
1640	cg27244410	chr10	C10orf11;C10orf11;C10orf11	Co-MNCog1
1641	cg26808328	chr14		NA
1642	cg13060480	chr5	CCDC152	NA
1643	cg26002218	chr14	CKB	Co-MNCog1
1644	cg03434624	chr12	VPS37B	NA
1645	cg09236323	chr14	TTLL5	Co-MNCog2
1646	cg22075362	chr2	SNTG2	Co-MNCog1
1647	cg02489006	chr11	PACSIN3;PACSIN3;PACSIN3	NA
1648	cg22998171	chr9	FAM205A	Co-MNCog1
1649	cg16901531	chr9	KCNT1;KCNT1	NA
1650	cg23213442	chr4	NFXL1	NA
1651	cg02210934	chr14		NA
1652	cg19990977	chr19	ATG4D	NA
1653	cg06913352	chr20	SNPH;SNPH	Co-MNCog1
1654	cg13536552	chr4		NA
1655	cg01791726	chr11		NA
1656	cg08903858	chr15	IL16;IL16;IL16	Co-MNCog2
1657	cg02003150	chr12		Co-MNCog2
1658	cg06348484	chr3	KLHL6	Co-MNCog2
1659	cg00260080	chr19	COPE;COPE;COPE	NA
1660	cg25807349	chr19	PPP5D1	NA
1661	cg04706144	chr13	ELF1;ELF1	Co-MNCog2
1662	cg26560895	chr7	INMT	NA
1663	cg00495988	chr2	SPEG	NA
1664	cg21692613	chrX	VSIG4;VSIG4;VSIG4;VSIG4;VSIG4;VSIG4;VSIG4;VSIG4;VSIG4;VSIG4	NA
1665	cg23071186	chr19	TNFSF14;TNFSF14	NA
1666	cg04191989	chr7	PRKAR1B;PRKAR1B;PRKAR1B;PRKAR1B;PRKAR1B;PRKAR1B	NA
1667	cg14701867	chr10	ZNF365;ZNF365	Co-MNCog2
1668	cg00831088	chr9	SLC25A25;NAIF1	NA
1669	cg12158056	chr15	MESDC2	NA
1670	cg04902429	chr17	FMNL1	Co-MNCog2
1671	cg12637085	chr13		NA
1672	cg06687318	chr3		NA
1673	cg27606313	chr11	KCNQ1;KCNQ1	NA
1674	cg21702516	chr12	ACAD10;ACAD10	NA
1675	cg19320820	chr4	AFF1;AFF1	Co-MNCog2
1676	cg21752134	chr16		NA
1677	cg03971740	chr18	MPPE1;MPPE1;MPPE1;MPPE1;MPPE1	Co-MNCog1
1678	cg09533556	chr10		NA
1679	cg15628959	chr1	THEM4	NA
1680	cg06449906	chr5	TBCA	NA
1681	cg06024013	chr16		NA
1682	cg15203770	chr4	TBC1D19;TBC1D19	NA
1683	cg03308445	chr12	SMARCC2;SMARCC2;SMARCC2	NA
1684	cg26280695	chr10	ITPRIP	Co-MNCog2
1685	cg14652958	chr9		NA
1686	cg00087546	chr1	PRDM16;PRDM16	NA
1687	cg11135843	chr1		NA
1688	cg18765542	chr11	DGKZ	Co-MNCog2
1689	cg27210766	chr2	BUB1	NA
1690	cg25025181	chr1	SMYD3;SMYD3	Co-MNCog2
1691	cg11322941	chr2	ARHGAP15	Co-MNCog1
1692	cg03540520	chr16	RNF40;RNF40;RNF40;PHKG2;C16orf93;C16orf93;C16orf93;PHKG2;C16orf93	Co-MNCog2
1693	cg19897676	chr2	WDFY1	Co-MNCog1
1694	cg08668772	chr20	GMEB2	NA
1695	cg17526741	chr5	2003-03-01	NA
1696	cg14205663	chr15	NR2F2;NR2F2	NA
1697	cg20999387	chr10	PSTK	NA
1698	cg10134204	chr6	FUCA2	NA
1699	cg23658362	chr1		NA
1700	cg02553070	chr17	ZNF830;CCT6B	NA
1701	cg02489769	chr12		NA
1702	cg01767614	chr1		Co-MNCog2
1703	cg09609665	chr7	AHCYL2;AHCYL2;AHCYL2	Co-MNCog2
1704	cg01824511	chr14	FOXA1;FOXA1	NA
1705	cg12558347	chr5	SLC22A5	NA
1706	cg23531459	chr8	NCALD;NCALD;NCALD;NCALD;NCALD;NCALD;NCALD	NA
1707	cg25925331	chr15		NA
1708	cg23618163	chr16	CTU2;CTU2	NA
1709	cg23830250	chr14	SLC8A3;SLC8A3;SLC8A3;SLC8A3;SLC8A3	NA
1710	cg22167656	chr9		NA
1711	cg18908374	chr11	SHANK2;SHANK2;SHANK2	NA
1712	cg01270773	chr8	EXT1	Co-MNCog1
1713	cg24954021	chr2	POLR1A	NA
1714	cg15689549	chr17	SDK2	Co-MNCog1
1715	cg17893108	chr7	C7orf50;C7orf50;C7orf50	Co-MNCog2
1716	cg03084308	chr16	UMOD;UMOD	Co-MNCog1
1717	cg10398605	chr16		NA
1718	cg13459035	chr7	SLC13A4	Co-MNCog1
1719	cg26702351	chr6		Co-MNCog2
1720	cg14136601	chr14	RGS6;RGS6;RGS6;RGS6;RGS6;RGS6;RGS6;RGS6;RGS6;RGS6	NA
1721	cg20648369	chr10	ADARB2	NA
1722	cg08072992	chr19	PRKACA	Co-MNCog2
1723	cg02636348	chr10	KCNMA1;KCNMA1;KCNMA1;KCNMA1	Co-MNCog1
1724	cg09979712	chr1	EPHA10	NA
1725	cg05895507	chr15	SCAPER;SCAPER	Co-MNCog2
1726	cg26777800	chr4	UGDH;UGDH;UGDH;MIR1273H;UGDH-AS1	NA
1727	cg06455993	chr11		Co-MNCog2
1728	cg16877162	chr13		NA
1729	cg14746493	chr7		NA
1730	cg07939626	chr6	DDR1;DDR1	NA
1731	cg20600820	chr6		Co-MNCog2
1732	cg11044983	chr19		Co-MNCog2
1733	cg16609432	chr19	CHST8;CHST8;CHST8	Co-MNCog1
1734	cg02444664	chr16	MAPK8IP3;MAPK8IP3	Co-MNCog1
1735	cg10609413	chr5	KIAA0825	Co-MNCog1
1736	cg07387761	chr5	TRIO	Co-MNCog2
1737	cg24422198	chr18	TNFRSF11A	NA
1738	cg27659974	chr2		NA
1739	cg17280605	chr20		NA
1740	cg02031712	chr17	RPH3AL	NA
1741	cg17799033	chr7	PTPRN2;PTPRN2;PTPRN2	NA
1742	cg25600562	chr9	PTCH1;PTCH1;PTCH1;PTCH1;PTCH1	NA
1743	cg13400600	chr9	ZFP37	Co-MNCog1
1744	cg00577619	chr20		Co-MNCog2
1745	cg04274827	chr7		NA
1746	cg26076233	chr12	DYNLL1	NA
1747	cg14041727	chr20		NA
1748	cg24760414	chr11	OSBPL5;OSBPL5;OSBPL5	NA
1749	cg01493379	chr2	COL6A3;COL6A3;COL6A3	Co-MNCog1
1750	cg02298401	chr21	PCBP3;PCBP3	Co-MNCog1
1751	cg27399667	chr9	MLLT3;MLLT3	NA
1752	cg20396299	chr20		NA
1753	cg26432869	chr8		NA
1754	cg14844624	chr18	LOXHD1;LOXHD1;LOXHD1	Co-MNCog1
1755	cg18022029	chr9		Co-MNCog2
1756	cg15906945	chr16		NA
1757	cg13627141	chrX	BCORL1	NA
1758	cg18049445	chr22		NA
1759	cg05165689	chr2		NA
1760	cg06898293	chr7		NA
1761	cg26055210	chr11	AHNAK;AHNAK	NA
1762	cg08839907	chr3	IQSEC1	Co-MNCog1
1763	cg23943589	chr12		NA
1764	cg12073548	chr7	AOAH	NA
1765	cg11659225	chr16	ADGRG3;ADGRG3	Co-MNCog1
1766	cg20975733	chr15	AGBL1	NA
1767	cg03623339	chr11	FAR1;FAR1	NA
1768	cg13905148	chr14		Co-MNCog2
1769	cg08946103	chr20	PTPRT;PTPRT	NA
1770	cg21546184	chr8		NA
1771	cg19597652	chr1	KCNAB2;KCNAB2	Co-MNCog1
1772	cg20232291	chr3		NA
1773	cg09205501	chr19	TMEM91;TMEM91;TMEM91;TMEM91;TMEM91;TMEM91	Co-MNCog1
1774	cg11027127	chr17	C17orf42	NA
1775	cg22321810	chr2	COL5A2	NA
1776	cg26945217	chr11	NAALAD2;NAALAD2	NA
1777	cg21491711	chr5	DBN1	NA
1778	cg12172020	chr13		NA
1779	cg02149314	chr7	CREB3L2;CREB3L2	NA
1780	cg20892200	chr7		Co-MNCog2
1781	cg22727960	chr1	FAM69A;FAM69A;FAM69A;FAM69A;FAM69A	Co-MNCog2
1782	cg20577205	chr20		NA
1783	cg08693745	chr12		NA
1784	cg22568451	chr10		NA
1785	cg01286365	chr1		NA
1786	cg17411016	chr2		Co-MNCog2
1787	cg24638271	chr12	NAA25	NA
1788	cg06507018	chr22		NA
1789	cg10217707	chr12	EP400NL	NA
1790	cg25300386	chr7	COL1A2;COL1A2	NA
1791	cg27648095	chr21	URB1	Co-MNCog2
1792	cg10918676	chr8	PUF60;PUF60;PUF60;PUF60;PUF60;PUF60;PUF60;PUF60	NA
1793	cg07895284	chr12	TAOK3	Co-MNCog1
1794	cg00607051	chr5	LRRC14B	NA
1795	cg12017061	chr13		Co-MNCog2
1796	cg04857551	chr21	IFNAR2;IFNAR2;IFNAR2;IFNAR2;IFNAR2;IFNAR2	NA
1797	cg11235869	chr1	KIF26B	Co-MNCog1
1798	cg26926138	chr4		NA
1799	cg27551322	chr14		Co-MNCog2
1800	cg03193349	chr6	REPS1;REPS1	NA
1801	cg12929625	chr2	CCDC104	NA
1802	cg27018424	chr6	HSD17B8	NA
1803	cg15454857	chr15	RPUSD2	NA
1804	cg19071098	chr1	LOC102724312;LOC102724312;LOC102724312	Co-MNCog2
1805	cg03968126	chr17	SP2	NA
1806	cg02131763	chr6	OR2B6	NA
1807	cg01489057	chr10	DMBT1;DMBT1;DMBT1	NA
1808	cg23755586	chr12		NA
1809	cg17067590	chr22		NA
1810	cg13530320	chr10	LOC619207	NA
1811	cg18929835	chr20	STK4	NA
1812	cg03365354	chr11	MCAM	NA
1813	cg15534928	chr10	TNKS2;TNKS2-AS1;TNKS2-AS1	NA
1814	cg04582058	chr12	ACACB	Co-MNCog1
1815	cg16899999	chr10		NA
1816	cg21080682	chr3	FYCO1	Co-MNCog1
1817	cg09178366	chr19		NA
1818	cg08901103	chr15	WDR72;WDR72	NA
1819	cg20192814	chr13		NA
1820	cg14614266	chr19	HRC	Co-MNCog1
1821	cg00415077	chr16	GNPTG	Co-MNCog1
1822	cg01585784	chr2	PTPN4;PTPN4	NA
1823	cg09055519	chr11		Co-MNCog2
1824	cg12669395	chr6	DDR1;DDR1;DDR1	NA
1825	cg18801825	chr19	GNG7	NA
1826	cg02079903	chr6	RBM24;RBM24;RBM24	Co-MNCog1
1827	cg12418961	chr18	CABLES1;CABLES1;CABLES1;CABLES1	Co-MNCog1
1828	cg25587200	chr21	UMODL1;UMODL1	Co-MNCog1
1829	cg26088423	chr10		NA
1830	cg16435580	chr8		NA
1831	cg26038749	chr4	SORCS2	NA
1832	cg16037021	chr12	RIC8B	NA
1833	cg09254347	chr6	ADGRB3	NA
1834	cg20270653	chr7	WBSCR17	NA
1835	cg07470302	chr2		NA
1836	cg00840412	chr12		NA
1837	cg03062245	chr20		NA
1838	cg06077079	chr2		NA
1839	cg20408104	chr6	ARID1B;ARID1B;ARID1B	Co-MNCog2
1840	cg21198935	chr19		NA
1841	cg25183474	chr7	ACTR3C;LRRC61;LRRC61	NA
1842	cg16648365	chr17		NA
1843	cg03493774	chr14	SLC24A4;SLC24A4;SLC24A4	NA
1844	cg19903957	chr8	TATDN1;TATDN1;TATDN1;NDUFB9	NA
1845	cg04480052	chr16	LMF1	NA
1846	cg01309046	chr20		Co-MNCog2
1847	cg11800868	chr10	JMJD1C;JMJD1C	NA
1848	cg22003804	chr11	KCTD21-AS1;KCTD21-AS1	Co-MNCog1
1849	cg10630051	chr2	KCTD18	Co-MNCog1
1850	cg16949104	chr16	HSD3B7;HSD3B7;HSD3B7	NA
1851	cg03960244	chr12		NA
1852	cg25658765	chr5	ITGA1	NA
1853	cg27088635	chr4	GUF1	NA
1854	cg06048153	chr20	MIR1257	NA
1855	cg17710779	chr10	FGFR2;FGFR2;FGFR2;FGFR2;FGFR2;FGFR2	NA
1856	cg13887949	chr19	LONP1;LONP1;LONP1;LONP1;CATSPERD	Co-MNCog1
1857	cg23858082	chr7	MUC17	NA
1858	cg01067190	chr6	ZNF311	Co-MNCog1
1859	cg02860608	chr3		NA
1860	cg02355653	chr6	LOC285830;LOC285830	NA
1861	cg15904674	chrX	GPR174	NA
1862	cg03288797	chr10	ASAH2B	NA
1863	cg06636172	chr6	FOXO3;FOXO3	NA
1864	cg05746872	chr10		NA
1865	cg00571727	chr10		NA
1866	cg20831094	chr8	MIR30B	NA
1867	cg26683198	chr1	PPAP2B	Co-MNCog2
1868	cg18011683	chr7		NA
1869	cg22395318	chr22	SLC5A1	Co-MNCog1
1870	cg22806527	chr5	HRH2	NA
1871	cg02849279	chr9	CACNA1B	NA
1872	cg11822265	chr10	CTNNA3;CTNNA3	Co-MNCog1
1873	cg13207339	chr6	PARK2;PARK2;PARK2	NA
1874	cg20496526	chr14	TC2N	Co-MNCog1
1875	cg09496393	chr6	KPNA5	NA
1876	cg26632494	chr5	C5orf44;TRIM23;C5orf44;C5orf44;TRIM23;C5orf44;TRIM23	NA
1877	cg08172915	chr8	MYOM2	NA
1878	cg04263684	chr10		NA
1879	cg23266243	chr3	TM4SF4	Co-MNCog1
1880	cg06854936	chr12		NA
1881	cg03846767	chr1	TP73;TP73;TP73;TP73;TP73;TP73;TP73	Co-MNCog1
1882	cg04343868	chr10		NA
1883	cg16427465	chr7	MUC12	Co-MNCog2
1884	cg21054077	chr17		NA
1885	cg15500259	chr1		NA
1886	cg06060107	chr19	NPAS1	Co-MNCog2
1887	cg08231326	chr18		NA
1888	cg06304576	chr17	DYNLL2	NA
1889	cg06001419	chr7		Co-MNCog2
1890	cg07231544	chr3	MITF	NA
1891	cg22272545	chr2	STK17B;STK17B	NA
1892	cg21128940	chr3	ACPP	Co-MNCog1
1893	cg00107629	chr11	DGKZ;DGKZ;DGKZ;DGKZ	NA
1894	cg22063024	chr2	KLHL29	Co-MNCog1
1895	cg25446197	chr4	PI4K2B	NA
1896	cg26688367	chr9	FANCC;FANCC;FANCC	NA
1897	cg06302321	chr7	LRCH4;LRCH4	NA
1898	cg05712639	chr14		Co-MNCog2
1899	cg03911627	chr6		NA
1900	cg14166494	chr18	CDH7;CDH7	Co-MNCog1
1901	cg20616102	chr22	MYO18B	NA
1902	cg15274662	chr7		NA
1903	cg25880515	chr4		NA
1904	cg24207616	chr7	OGDH;OGDH	Co-MNCog2
1905	cg08031876	chr12		NA
1906	cg16704586	chr16	LAT;LAT;LAT;LAT;LAT;LAT;LAT	Co-MNCog2
1907	cg06696927	chr14	BRF1;BRF1;BRF1;BRF1;BRF1;BRF1	NA
1908	cg12562327	chr10		NA
1909	cg11225969	chr20	PCNA	Co-MNCog2
1910	cg11373895	chr2		NA
1911	cg04127903	chr3	AHSG	NA
1912	cg22786903	chr14	SDR39U1	NA
1913	cg08670465	chr5	LCP2	NA
1914	cg25564733	chr19	ZNF331;ZNF331	NA
1915	cg16980245	chr15	SNORD115-42;SNORD115-10	NA
1916	cg18306593	chr14	LINC01599	Co-MNCog2
1917	cg01246566	chr6		Co-MNCog2
1918	cg14125306	chr20	ASXL1;ASXL1	NA
1919	cg21863544	chr6		NA
1920	cg00364001	chr3	P4HTM;P4HTM	NA
1921	cg06287505	chr5		Co-MNCog2
1922	cg00088148	chr2		NA
1923	cg06657409	chr11	SLC22A6;SLC22A6;SLC22A6;SLC22A6;SLC22A6;SLC22A6;SLC22A6;SLC22A6	NA
1924	cg20985561	chr20	LKAAEAR1;OPRL1;OPRL1;OPRL1	NA
1925	cg11004401	chr12	NACA;NACA;NACA;NACA	NA
1926	cg17106876	chr12	IQSEC3;IQSEC3	Co-MNCog1
1927	cg00912035	chr19	PLIN3;PLIN3;PLIN3	NA
1928	cg25611736	chr14	KIF26A	NA
1929	cg03047708	chr8	FAM110B	NA
1930	cg20273531	chr5	FAM134B;FAM134B	Co-MNCog2
1931	cg11449496	chr12	PSMD9;PSMD9;PSMD9	NA
1932	cg07588263	chr8	C8orf40;C8orf40;C8orf40;SLC20A2;C8orf40;C8orf40;C8orf40	NA
1933	cg20321319	chr8		NA
1934	cg08621656	chr8	PINX1;PINX1	NA
1935	cg10159113	chr12	CHST11;CHST11	Co-MNCog2
1936	cg15810615	chr12	ATP2A2;ATP2A2;ATP2A2	NA
1937	cg09846875	chr7	FAM115A	NA
1938	cg08526024	chr16	MAPK8IP3;MAPK8IP3	NA
1939	cg06666948	chr12	IQSEC3;IQSEC3	Co-MNCog1
1940	cg02219949	chr17	SP6	NA
1941	cg02522397	chr3		NA
1942	cg13646020	chr4	PHOX2B	NA
1943	cg18674033	chr16		NA
1944	cg04572289	chr4	ACOX3;ACOX3	Co-MNCog1
1945	cg03894174	chr5		NA
1946	cg24890045	chr4	FAT1	Co-MNCog1
1947	cg07035811	chr5		Co-MNCog2
1948	cg03579045	chr8	GATA4	NA
1949	cg01405242	chr8		NA
1950	cg10919387	chrX	KDM6A;KDM6A;KDM6A;KDM6A;KDM6A;KDM6A;KDM6A	NA
1951	cg26717554	chr19	ELANE	Co-MNCog2
1952	cg22310229	chr19	ABHD8	Co-MNCog1
1953	cg08980420	chr2		NA
1954	cg05876699	chr13	LOC101929140	Co-MNCog2
1955	cg14631910	chr8		NA
1956	cg17173593	chr5	FLT4;FLT4	Co-MNCog1
1957	cg23537517	chr17	MAP2K3	NA
1958	cg00952054	chr1		NA
1959	cg16043968	chr1	WNT4	Co-MNCog1
1960	cg06509065	chr9	UBAP2;UBAP2	NA
1961	cg14793611	chr10		NA
1962	cg00405567	chr9	FANCG	NA
1963	cg10792161	chr17		Co-MNCog2
1964	cg15744692	chr15	LOC145663;GATM	NA
1965	cg25962332	chr18	FECH;FECH	Co-MNCog1
1966	cg16044050	chr6		NA
1967	cg23708673	chr12	ATP2A2;ATP2A2	NA
1968	cg25596818	chr1	S100PBP;S100PBP	NA
1969	cg06201763	chr11	ALG9;ALG9;ALG9;ALG9	NA
1970	cg22471112	chr4	TRIM2;TRIM2	Co-MNCog1
1971	cg22914729	chr4	PITX2;PITX2;PITX2	NA
1972	cg03223580	chr12	BBS10	NA
1973	cg02672737	chr15	GRAMD2	NA
1974	cg17234150	chr16	CACNG3;CACNG3	NA
1975	cg14581129	chr12		NA
1976	cg24392368	chr10		NA
1977	cg04396711	chr3	FGD5	Co-MNCog1
1978	cg13688599	chr20		NA
1979	cg18029039	chr17	RPH3AL	Co-MNCog1
1980	cg10088779	chr19		NA
1981	cg17586573	chr15	HDC;HDC	Co-MNCog1
1982	cg13488011	chr15		NA
1983	cg23617472	chr11	TTC12	Co-MNCog1
1984	cg07059157	chr12	LOC400043	NA
1985	cg22539465	chr19		NA
1986	cg21371950	chr6		NA
1987	cg27475162	chr15		NA
1988	cg14626898	chr8		NA
1989	cg09308274	chr3		NA
1990	cg03159676	chr16		NA
1991	cg12765979	chr2	FAM98A;FAM98A	NA
1992	cg20986307	chr12	GPD1;C12orf62	NA
1993	cg09370016	chr1	FRRS1	NA
1994	cg21562656	chr14		NA
1995	cg21737444	chr22	LGALS1	Co-MNCog1
1996	cg23357130	chr11	OSBPL5;OSBPL5;OSBPL5	NA
1997	cg03963200	chr20	PHACTR3;PHACTR3;PHACTR3	NA
1998	cg26475909	chr9		NA
[truncated: 1,002 more rows]

## Sheet: Data_2
Data 2. CpGs and annotated genes identified using the missMethyl database within the Co-MNcog1 network, along with their corresponding kwithin values
CpG_Name	UCSC_RefGene_Name	UCSC_RefGene_Group	kWithin
cg20584787			45.963
cg20126910	GRHL2	Body	41.6276
cg23943589			41.3147
cg12502262	FER1L6;FER1L6-AS1	Body;Body	41.1145
cg16973111	DLGAP1;DLGAP1;DLGAP1;DLGAP1;DLGAP1;DLGAP1;DLGAP1;DLGAP1;DLGAP1	Body;Body;Body;Body;Body;Body;Body;Body;Body	39.7246
cg24657461			36.4793
cg01967465	PLB1;PLB1	Body;Body	36.3872
cg10198943			35.4386
cg13536552			34.19
cg13257390	AGBL2	Body	34.1121
cg15859167			34.0585
cg11805188	SLC12A7	Body	32.7057
cg14707627			32.4721
cg13015710			31.7426
cg25616787	SPSB1	5'UTR	29.969
cg26665701	NKD1	Body	29.6242
cg02045164	INPP5A	Body	29.2329
cg19042497			29.1981
cg25555781	LRRFIP1	Body	29.1462
cg24267597			28.086
cg19597652	KCNAB2;KCNAB2	Body;Body	27.9399
cg16534427	FLJ10357	Body	27.4304
cg02876129			27.0947
cg00921138	BEAN1;BEAN1;BEAN1;BEAN1;BEAN1;BEAN1;BEAN1;BEAN1	ExonBnd;ExonBnd;ExonBnd;ExonBnd;5'UTR;5'UTR;5'UTR;Body	26.9949
cg09368704	IL31;LRRC43	TSS200;5'UTR	26.5533
cg21210220			26.3152
cg16686932	RBFADN	TSS200	25.1176
cg12889998			24.9388
cg22539465			24.9354
cg00891025	EPB49;EPB49;EPB49;EPB49	TSS200;5'UTR;5'UTR;5'UTR	24.6698
cg21414595			24.544
cg13823144	SPTBN2	Body	23.819
cg23457518			23.7812
cg10631289			23.716
cg17840132	DAB2	Body	23.5498
cg27401880	MICAL2;MICAL2;MICAL2;MICAL2;MICAL2;MICAL2	3'UTR;3'UTR;3'UTR;3'UTR;3'UTR;3'UTR	22.7793
cg02381935			22.4257
cg25252405			22.2036
cg03888765	KIF17;KIF17	Body;Body	21.5549
cg10757780	LAMC3	Body	21.4991
cg12326166	FRMD3;FRMD3;FRMD3	TSS1500;Body;Body	21.192
cg18311636	PRPF40B;PRPF40B	Body;5'UTR	20.9794
cg26757279			20.7891
cg27617132	INPP5A	Body	20.7559
cg24286200	TBXAS1;TBXAS1	5'UTR;5'UTR	20.1173
cg17211612	DNAH10	Body	20.087
cg20336524			20.0397
cg12386698			19.7522
cg16043968	WNT4	Body	19.7412
cg01374570			19.7081
cg11784420	ARHGEF17	Body	19.6581
cg03455637			19.5673
cg20280926	GALNT14;GALNT14;GALNT14;GALNT14	Body;Body;Body;Body	19.5311
cg24127021	PRKAG2;PRKAG2	5'UTR;Body	19.5015
cg25622493	TRAPPC9;TRAPPC9	Body;Body	19.3869
cg14137548	C10orf72;C10orf72	Body;Body	19.3267
cg12368557	PDGFRL	Body	19.1728
cg23475135	ESPNL	Body	19.1354
cg08580399	THBS1	Body	19.0344
cg07264323	DAB1	Body	18.9655
cg21434600			18.7499
cg13606495			18.5818
cg09869171			18.5609
cg18613685	PTPRS;PTPRS;PTPRS;PTPRS	Body;Body;Body;Body	18.507
cg23569968	SCGB1A1	TSS1500	18.4629
cg15876825	VGLL4;VGLL4	Body;Body	18.3692
cg21371950			18.303
cg08681473	COL1A1	Body	18.1958
cg16175627			18.0653
cg10409596			17.95
cg19643097	PACS2;PACS2	Body;Body	17.9478
cg10609413	KIAA0825	Body	17.7017
cg10199840	TBC1D22A;TBC1D22A;TBC1D22A;TBC1D22A;TBC1D22A	Body;Body;Body;Body;Body	17.3327
cg15689549	SDK2	Body	17.2976
cg08732456	PRKCZ;PRKCZ	Body;5'UTR	17.2834
cg04897900			17.1627
cg00766535			17.108
cg20543098			16.843
cg13275347	LOC100507391	Body	16.8415
cg12378592	MROH7;MROH7;MROH7;MROH7;MROH7-TTC4;MROH7-TTC4;MROH7-TTC4	Body;Body;Body;Body;Body;Body;Body	16.7484
cg10317145	ABCG8;ABCG5	TSS1500;1stExon	16.6882
cg08980420			16.6499
cg20002303			16.6334
cg18576800	LRFN3	Body	16.5651
cg27415283	SEPT9;SEPT9;SEPT9;SEPT9;SEPT9	Body;Body;Body;Body;Body	16.4892
cg12536361	C1QTNF1;C1QTNF1;C1QTNF1;C1QTNF1-AS1;C1QTNF1-AS1	TSS1500;TSS1500;TSS200;Body;Body	16.0958
cg06741446	HIVEP3;HIVEP3;HIVEP3;HIVEP3	5'UTR;5'UTR;Body;Body	16.0623
cg19326874	TBC1D1	5'UTR	16.0589
cg05004424	TNS1	TSS1500	16.0383
cg02973012			16.0004
cg13935480	WNT3A	Body	15.9759
cg21875114	ETS1	TSS1500	15.9348
cg26684131	HLA-DRA	Body	15.7783
cg05892226			15.7503
cg17586573	HDC;HDC	TSS1500;TSS1500	15.7282
cg00508771	SCN2A;SCN2A;SCN2A	Body;Body;Body	15.6586
cg17983632			15.623
cg15469655	SUSD5	Body	15.4839
cg04117886	SOX13	5'UTR	15.4073
cg04697598	C15orf41;C15orf41;C15orf41	Body;Body;Body	15.3651
cg15852490			15.3439
cg08491721			15.3062
cg15406943	LOC101929331	TSS1500	15.2964
cg04131508			15.2827
cg04290427			15.2441
cg06024013			15.0765
cg02393907	ACTR3C	5'UTR	15.0312
cg05209330	P4HA2;P4HA2;P4HA2;P4HA2;P4HA2	Body;Body;Body;Body;Body	14.9359
cg19950097			14.8559
cg07846855	C10orf11	Body	14.8033
cg27017382	CDH23;CDH23	5'UTR;5'UTR	14.7455
cg06913352	SNPH;SNPH	ExonBnd;Body	14.6656
cg26444348	TNFSF9	TSS1500	14.3228
cg18797504	DLGAP1;DLGAP1;DLGAP1;DLGAP1;DLGAP1;DLGAP1;DLGAP1;DLGAP1;DLGAP1	Body;Body;Body;Body;Body;Body;Body;Body;Body	14.2912
cg05767445			14.2759
cg07949738	ST5;ST5;ST5	Body;Body;Body	14.218
cg15580167	CHRNA1;CHRNA1	TSS200;TSS200	14.1718
cg04311994	PTPRS;PTPRS;PTPRS;PTPRS	Body;Body;Body;Body	14.1304
cg23819669	DNAJB8	TSS1500	14.0659
cg12788400			14.0125
cg23658362			13.9675
cg01506744	NTSR1	Body	13.8892
cg07464206			13.8646
cg06182503	SLC17A3;SLC17A3	5'UTR;5'UTR	13.7365
cg14074944	TNC	Body	13.6888
cg06878802	IL4R;IL4R;IL4R;IL4R	Body;Body;Body;Body	13.6085
cg25962332	FECH;FECH	TSS1500;TSS1500	13.5121
cg10791984	LOC101927911;RAP1GAP2;RAP1GAP2	TSS1500;Body;Body	13.51
cg24835190	SLC6A6;SLC6A6;SLC6A6;SLC6A6	5'UTR;5'UTR;Body;Body	13.4904
cg00580256	TM6SF1;TM6SF1	Body;Body	13.485
cg24473663	DNASE1L3;DNASE1L3	TSS1500;TSS1500	13.3175
cg05263382			13.3136
cg17500968	TRPV4	5'UTR	13.2598
cg10913296			13.2187
cg19286672	SGCA;SGCA	TSS1500;TSS1500	13.1964
cg16224278	NFAM1	Body	13.1046
cg23266243	TM4SF4	Body	13.09
cg10510442	ZHX2	3'UTR	13.0882
cg06718796	DEFB134;DEFB134	5'UTR;ExonBnd	13.047
cg21029631			13.0148
cg19546781	CCL17;CCL17	1stExon;5'UTR	12.9302
cg01405242			12.9295
cg23085553			12.83
cg19147112	NKAIN1	Body	12.8168
cg14922471	BHMG1	Body	12.6812
cg17049833			12.5196
cg10630051	KCTD18	Body	12.4782
cg11073447	CUX2	Body	12.4514
cg00387200			12.3694
cg03138318	ANPEP;ANPEP	ExonBnd;Body	12.3393
cg19809645	CAPN13	TSS1500	12.2728
cg03377392	PRKCZ	Body	12.2686
cg16429759	PHLDA3;PHLDA3	3'UTR;Body	12.1946
cg20496526	TC2N	TSS1500	12.165
cg01752534	CCDC3	5'UTR	12.1111
cg19789352	FAM110D	TSS1500	12.0673
cg07524505	TSPAN18	TSS200	12.0064
cg08019307	PROK1;PROK1	5'UTR;1stExon	11.9441
cg05930046			11.9026
cg04582058	ACACB	Body	11.8895
cg06723421	SLC45A1	1stExon	11.8597
cg13801291	LOC101927066	Body	11.8314
cg04752891	MKLN1	Body	11.7981
cg27536424			11.7144
cg03777135	PTPN3;PTPN3;PTPN3;PTPN3;PTPN3;PTPN3;PTPN3	3'UTR;3'UTR;3'UTR;3'UTR;3'UTR;3'UTR;Body	11.7117
cg10649156			11.7073
cg00836272	ARHGEF3	Body	11.6972
cg03494723			11.6241
cg05256688	WIZ	Body	11.6042
cg07050033			11.5998
cg10139608			11.5478
cg13459035	SLC13A4	Body	11.5399
cg10636442	CDH23;CDH23;CDH23;CDH23;CDH23	Body;Body;Body;Body;Body	11.4308
cg09614189	WNK2;WNK2	Body;Body	11.4176
cg12803215	CNGB1;CNGB1	Body;Body	11.4058
cg03381007	GALNS	Body	11.1712
cg21152351			11.1698
cg21740960	REPS1;REPS1;REPS1;REPS1	Body;Body;Body;Body	11.157
cg26183671	RUNX3	Body	11.1465
cg12255501			11.1048
cg17331334			11.058
cg03634657			11.0279
cg06898293			11.0154
cg04305821	ZCCHC14	Body	10.9965
cg08461802	DIP2C	Body	10.9879
cg09468238			10.9188
cg03841598	LINC01447	Body	10.8563
cg02355868	CBFA2T3	Body	10.839
cg24267828			10.8213
cg15851931	CRELD1;CRELD1;CRELD1	Body;Body;Body	10.7717
cg00541854	GPR142	TSS1500	10.7103
cg02079903	RBM24;RBM24;RBM24	Body;Body;Body	10.7099
cg10613706			10.6765
cg00397849	ALS2CL	5'UTR	10.672
cg05007486			10.5775
cg11964389	ARHGAP40	Body	10.5475
cg00591500			10.5459
cg00904483	MGMT	Body	10.4982
cg09013709			10.4525
cg17223590	LOC100420587	Body	10.4407
cg09430364	ADAMTS2;ADAMTS2	Body;Body	10.408
cg15237757			10.2172
cg11825875	FLJ16171	Body	10.2034
cg10634032			10.1449
cg21128940	ACPP	3'UTR	9.93013
cg06666948	IQSEC3;IQSEC3	Body;Body	9.86751
cg04263684			9.79273
cg08475832			9.7525
cg08695416			9.71364
cg06948187	FAM219A;FAM219A;FAM219A;FAM219A;FAM219A;FAM219A	Body;Body;Body;Body;Body;Body	9.63063
cg16032703	KCND3;KCND3	Body;Body	9.61691
cg05503916	SEPT9;SEPT9;SEPT9;SEPT9;SEPT9;SEPT9;SEPT9	Body;Body;Body;Body;Body;Body;Body	9.59926
cg20872930	LOC400867	Body	9.58928
cg20343982			9.57647
cg23129024			9.54834
cg01982533	AXIN2	Body	9.54637
cg11327463	EMID1;EMID1;EMID1;EMID1	ExonBnd;ExonBnd;Body;Body	9.52665
cg14151695	EYA2;EYA2	5'UTR;5'UTR	9.50722
cg14844624	LOXHD1;LOXHD1;LOXHD1	TSS1500;Body;Body	9.50177
cg12562327			9.48757
cg10847261			9.48354
cg25880515			9.4778
cg10417457			9.35338
cg11235869	KIF26B	Body	9.3352
cg22395318	SLC5A1	TSS1500	9.27528
cg04459030	GHRH	Body	9.26194
cg06937654			9.22329
cg23225469	CLPB	Body	9.20861
cg02741348	VIPR1;VIPR1-AS1;VIPR1;VIPR1;VIPR1;VIPR1	Body;TSS1500;Body;Body;Body;Body	9.19883
cg03819983			9.13751
cg13392302	PSCA	TSS200	9.12033
cg08373023	AATK	Body	9.09344
cg02911689	TRABD2B	Body	9.04635
cg23203730	MAD1L1;MAD1L1;MAD1L1	Body;Body;Body	8.98072
cg21532310	THPO;THPO;THPO;THPO;THPO;THPO;THPO;THPO;THPO;THPO	5'UTR;5'UTR;5'UTR;5'UTR;5'UTR;5'UTR;5'UTR;5'UTR;5'UTR;Body	8.96083
cg04569877			8.94923
cg01923905	DSCAML1	Body	8.91991
cg18572606			8.88212
cg04853337			8.85645
cg02629844			8.85009
cg22575043			8.83542
cg10582371	GALNT14	3'UTR	8.81654
cg17050394			8.78963
cg18952253	TBC1D28	5'UTR	8.7838
cg11451589			8.76794
cg09212014	DLK1	TSS1500	8.73282
cg26796807			8.71163
cg00939910			8.70181
cg08498318	IL32;IL32;IL32;IL32;IL32;IL32;IL32;IL32;IL32	Body;Body;Body;Body;Body;Body;Body;Body;Body	8.6802
cg21277742	C3orf20;C3orf20;C3orf20	Body;Body;Body	8.676
cg10786321			8.67561
cg09381559			8.64783
cg09851121			8.58309
cg22437240			8.54479
cg09903158			8.54329
cg17380533	MSC-AS1;MSC-AS1	Body;Body	8.53174
cg13147740			8.51933
cg13400600	ZFP37	Body	8.49453
cg02447728			8.4794
cg08664695			8.44341
cg26431018			8.42045
cg19359072	CYP19A1;CYP19A1	5'UTR;5'UTR	8.41419
cg23829641	PTPRT;PTPRT	Body;Body	8.4085
cg11619533			8.37826
cg24137322	SHROOM3	Body	8.36726
cg02364654			8.36277
cg11390443	ROR1;ROR1	Body;Body	8.35398
cg03891993	LOC101928241	Body	8.31466
cg05824990			8.27483
cg07507263			8.25904
cg03918703	MIR208B;MYH7	TSS1500;Body	8.2257
cg16045897	FHOD3	Body	8.19734
cg25256259	TSPAN15	Body	8.13721
cg17778482	PTPN14	Body	8.13149
cg14436272	NMUR1	Body	8.09888
cg04517614	MAGI1;MAGI1;MAGI1	Body;Body;Body	8.08359
cg06090314	FAM120A;FAM120A;FAM120A;FAM120A;FAM120A;FAM120A;FAM120A	ExonBnd;ExonBnd;ExonBnd;Body;Body;Body;Body	8.06544
cg11659225	ADGRG3;ADGRG3	Body;Body	8.04078
cg14394537	MLPH;MLPH;MLPH;MLPH;MLPH	Body;Body;Body;Body;Body	8.02848
cg21080682	FYCO1	Body	8.02174
cg23264682	GALNT8	TSS1500	8.00457
cg03277534			7.97415
cg23685594			7.96171
cg20597484	HNF1A	Body	7.9308
cg10294363	SCNN1A;SCNN1A;SCNN1A	Body;Body;Body	7.92172
cg19897676	WDFY1	Body	7.89832
cg04015603			7.8911
cg03602119			7.8871
cg01858394	SNPH	Body	7.88001
cg04499701			7.87233
cg27244410	C10orf11;C10orf11;C10orf11	Body;Body;Body	7.85284
cg16240750	ACOX3;ACOX3	Body;Body	7.83412
cg27195956	TRIM71	Body	7.71872
cg15526732			7.64781
cg08753227	HSF2BP	Body	7.63772
cg22153345	ERICH1	Body	7.60011
cg24793782			7.58897
cg01574903	MIR522	TSS1500	7.58284
cg24068655	LOC101929268	Body	7.56223
cg14626898			7.52658
cg05946942	NAV2	Body	7.52018
cg09429338	SHROOM3	Body	7.52014
cg09430943			7.5144
cg14010015	SIGLEC1	Body	7.4903
cg15912148	FKBP10	Body	7.47799
cg22660596			7.47147
cg07470302			7.46564
cg21562656			7.44156
cg26871703	MGC15885	Body	7.41531
cg06811101			7.39336
cg23145732			7.38498
cg19386228			7.36947
cg06507018			7.3653
cg07599432	PDZD8	Body	7.33519
cg07895284	TAOK3	5'UTR	7.29273
cg13970526			7.26648
cg01493379	COL6A3;COL6A3;COL6A3	Body;Body;Body	7.26174
cg09974925	BCR;BCR	Body;Body	7.2557
cg01777372	PRR16;PRR16;PRR16;PRR16	Body;5'UTR;Body;5'UTR	7.22815
cg03311645			7.16624
cg02792322	IL17D	Body	7.15768
cg12990904			7.15067
cg24578289	SYNDIG1	5'UTR	7.12748
cg16032108			7.07973
cg14296255			7.07736
cg08367485			7.06807
cg20531580	LINC01272	5'UTR	7.04242
cg02408910	GRID1	Body	7.03288
cg27086879	GALNTL6	Body	7.01578
cg11286341	DPYSL2;DPYSL2;DPYSL2	Body;Body;Body	7.01014
cg22063024	KLHL29	5'UTR	6.99368
cg02787615	C2orf55	Body	6.98959
cg08430886	ARNT2;ARNT2	ExonBnd;Body	6.97322
cg24531396	MB;MB;MB	TSS200;TSS200;5'UTR	6.96925
cg07681739	CAMKV	Body	6.94578
cg10096139	LOC100422737	Body	6.94046
cg19182267	IL17RD	Body	6.88715
cg17173593	FLT4;FLT4	Body;Body	6.86052
cg22589697	ZNF608	Body	6.83444
cg06900650	TUBA3E	TSS200	6.82534
cg07228654	MYL10	Body	6.82457
cg25163604			6.81419
cg01243513	DTX3;GEFT	3'UTR;TSS1500	6.78271
cg05740505			6.77592
cg01960096	ARHGEF11;ARHGEF11	Body;Body	6.72204
cg17418414			6.67372
cg08831252			6.65839
cg14035828			6.6533
cg04877256	HMCN2	Body	6.65241
cg06925438	SLC9A3	Body	6.60134
cg11207886	GRIK4;GRIK4;GRIK4	5'UTR;5'UTR;5'UTR	6.57614
cg23617472	TTC12	Body	6.56061
cg15800327	FAM53B	5'UTR	6.54588
cg12570921	C5orf66	5'UTR	6.54323
cg17299566	SMOC1;SMOC1	Body;Body	6.53906
cg18406151	ERBB2IP;ERBB2IP;ERBB2IP;ERBB2IP;ERBB2IP;ERBB2IP	5'UTR;5'UTR;5'UTR;5'UTR;5'UTR;5'UTR	6.48431
cg18496842	HR;HR	Body;Body	6.46366
cg01677327			6.43187
cg11011501	C12orf54	Body	6.41986
cg13848961	NOX5;NOX5;NOX5;NOX5;NOX5;MIR548H4	Body;Body;Body;Body;Body;Body	6.41631
cg22069097	COL6A5;COL6A5;COL6A5	Body;Body;Body	6.40872
cg02444664	MAPK8IP3;MAPK8IP3	Body;Body	6.33133
cg21832826			6.28302
cg08304080			6.17225
cg08064286	PRKCZ;PRKCZ;PRKCZ;PRKCZ	Body;Body;Body;Body	6.16406
cg17028865			6.15591
cg23658893			6.14451
cg22003804	KCTD21-AS1;KCTD21-AS1	Body;Body	6.13435
cg15203196			6.12767
cg00753489			6.10781
cg04285141			6.09709
cg08135764	RASAL2;RASAL2	Body;Body	6.06234
cg20370783	NPAS2	5'UTR	6.02543
cg25576497	PAPPA2;PAPPA2	Body;Body	6.02448
cg09309687	SDK1	Body	5.98374
cg00676833			5.91764
cg09579932	TRPV1;TRPV1;TRPV1	5'UTR;5'UTR;TSS200	5.89441
cg02852162			5.87305
cg00350478	FRMD1	TSS200	5.87094
cg09270255	PPP1R13B	TSS1500	5.84914
cg24827715	SLC47A2;SLC47A2;SLC47A2	TSS1500;TSS1500;TSS1500	5.8317
cg14562983	GLI4	TSS1500	5.79679
cg26100071	ABCC8;ABCC8	Body;Body	5.79647
cg16173787			5.76606
cg24114545	ADSSL1;ADSSL1	Body;Body	5.75942
cg11506090	CASC20	Body	5.72128
cg02943906	JAKMIP2-AS1;JAKMIP2;JAKMIP2;JAKMIP2;JAKMIP2	Body;Body;Body;Body;Body	5.70565
cg08826925			5.67101
cg09205501	TMEM91;TMEM91;TMEM91;TMEM91;TMEM91;TMEM91	Body;Body;Body;Body;Body;Body	5.64275
cg03331958	SMYD1	Body	5.63615
cg19562160	THAP8	Body	5.60906
cg07420027	IL12A;IL12A-AS1	TSS1500;Body	5.60622
cg14478713	BNC2	Body	5.58057
cg15634928	LOC645323	Body	5.55917
cg20321319			5.50359
cg06005661	LINC00173	Body	5.49372
cg22998171	FAM205A	TSS1500	5.48616
cg22025210			5.47875
cg25690118	CGN	Body	5.4685
cg06601131	DPYSL2;DPYSL2;DPYSL2	Body;Body;Body	5.46649
cg11274217			5.44725
cg03239957			5.44094
cg13887949	LONP1;LONP1;LONP1;LONP1;CATSPERD	TSS1500;TSS1500;TSS1500;TSS1500;Body	5.41446
cg11066776	SPRR4	TSS1500	5.37776
cg03986594	LZTFL1;LZTFL1	5'UTR;Body	5.37589
cg12418961	CABLES1;CABLES1;CABLES1;CABLES1	Body;Body;Body;Body	5.37071
cg17067590			5.34613
cg08053947	FAM181A;FAM181A;FAM181A-AS1	5'UTR;5'UTR;Body	5.34233
cg02807723	CRB1;CRB1;CRB1;CRB1;CRB1;CRB1	Body;Body;Body;Body;Body;Body	5.33387
cg15004915			5.32845
cg11780042	MIR329-2	TSS200	5.32005
cg27348120			5.30554
cg25295510	SIPA1L3;SIPA1L3	ExonBnd;Body	5.28565
cg19853638	SH3PXD2A	Body	5.27727
cg17897421			5.25124
cg14924131			5.24732
cg14265755	AGAP1;AGAP1;AGAP1	Body;Body;Body	5.23693
cg03589259	BSN	Body	5.23478
cg20785612	HDHD2	TSS1500	5.22334
cg21467100			5.21454
cg26328924			5.214
cg05452558			5.17123
cg20378131	COL1A1	TSS1500	5.17102
cg03441713	UMODL1;UMODL1	TSS200;TSS200	5.03939
cg06854936			5.03213
cg09967116	FOXN3;FOXN3	Body;Body	4.94714
cg13828610			4.89988
cg27019059			4.85842
cg04087185			4.83833
cg07864639	PPP2R2C;PPP2R2C	Body;Body	4.83741
cg20446846	PDS5B	Body	4.77071
cg02489769			4.74564
cg20400017			4.73569
cg21574430			4.69341
cg05643339	TNN	TSS1500	4.68109
cg19581936	ZCCHC24	Body	4.6083
cg27495223	C3orf20	Body	4.59289
cg24949579	OR56A4	TSS1500	4.55309
cg18011683			4.52685
cg15906945			4.52669
cg08455936	KIAA0556	Body	4.49695
cg20715809			4.49347
cg20037088			4.49114
cg11967835	CPSF1	Body	4.45803
cg12762449	MCF2L;MCF2L	Body;Body	4.44012
cg17108187			4.42101
cg20101398	HS3ST5	TSS200	4.40427
cg01270773	EXT1	Body	4.39834
cg06011560			4.3614
cg11322941	ARHGAP15	Body	4.33139
cg11461263	MIR520G	TSS200	4.2898
cg26477711			4.27672
cg23177527			4.27419
cg21751023	FSCN3	3'UTR	4.26123
cg08957036			4.23221
cg05985767	ANPEP	Body	4.22646
cg08227583			4.22332
cg11495966	ART3	TSS200	4.20787
cg11688553			4.19161
cg21452808			4.19047
cg27475162			4.18938
cg15676292			4.17838
cg23700928	FAM19A5;FAM19A5	Body;Body	4.1666
cg15059176	PRDM16;PRDM16	Body;Body	4.16564
cg02904800	TSPAN12	Body	4.13009
cg02164004	RPS6KA2;RPS6KA2	Body;Body	4.12632
cg27109748	MAD1L1;MAD1L1;MAD1L1	Body;Body;Body	4.12615
cg00973942			4.09507
cg14683730	COL11A2;COL11A2;COL11A2	Body;Body;Body	4.0669
cg24676612	KCNA2;KCNA2	5'UTR;1stExon	4.04654
cg24445796	CYP4F22	TSS1500	4.0418
cg18262224			4.01888
cg00844567			4.00989
cg25621286			3.99056
cg03200309	H1FNT;H1FNT	5'UTR;1stExon	3.98723
cg11105339			3.94951
cg05760765			3.9432
cg18674033			3.92715
cg19629208	SLC34A1;SLC34A1	TSS1500;TSS1500	3.91777
cg09999998	SEZ6L;SEZ6L;SEZ6L;SEZ6L;SEZ6L;SEZ6L	Body;Body;Body;Body;Body;Body	3.86621
cg18995042			3.85027
cg08187361	RPH3A;RPH3A	Body;Body	3.83294
cg04568894	CACNG3	Body	3.7876
cg23104930	FBRSL1	Body	3.78564
cg09280022	DIP2C	Body	3.78067
cg19186307	C4orf23	Body	3.75145
cg07253692	LINC00951	Body	3.74342
cg03234976			3.71993
cg05107149	HMOX1	Body	3.71841
cg14303187	SHC3	Body	3.6903
cg00729171			3.68722
cg01067190	ZNF311	Body	3.6765
cg10020309	GTF2E1	Body	3.66937
cg09337943	SLC22A11	Body	3.61802
cg10561971	GALNT18;GALNT18	ExonBnd;Body	3.59351
cg14746493			3.5724
cg09646578			3.54188
cg03916430	LINC00243	TSS1500	3.5242
cg14993912			3.51066
cg09064486			3.49937
cg04841337			3.48805
cg04165964			3.48553
cg07519926			3.46641
cg14614266	HRC	TSS1500	3.44897
cg06857921			3.43422
cg07043889			3.43063
cg07582655			3.42671
cg03581422	APOOP5	Body	3.37742
cg21974350			3.34327
cg10172246	DOC2B	Body	3.33005
cg04157722			3.31011
cg21214294			3.30912
cg15540533			3.3035
cg19523670	ZBP1;ZBP1;ZBP1	Body;Body;Body	3.28559
cg07972114			3.26767
cg08178031	ST6GAL1;ST6GAL1	5'UTR;5'UTR	3.26748
cg20649663	HECW2	Body	3.25978
cg09511513	ATP6V1B2	Body	3.24476
cg10669597	POLR3G;MBLAC2	5'UTR;TSS1500	3.23552
cg11714554			3.22419
cg09399224			3.18709
cg14984970			3.11013
cg19372324			3.08457
cg04833007	LEP	3'UTR	3.07844
cg18268962	CNTN3	Body	3.07316
cg10910972	CPA2	Body	3.06089
cg00599151	PHACTR3;PHACTR3;PHACTR3;PHACTR3;PHACTR3;PHACTR3	TSS1500;TSS1500;5'UTR;5'UTR;Body;Body	2.99426
cg24204878	PTPRN2;PTPRN2;PTPRN2	Body;Body;Body	2.97818
cg12767196	TNR	5'UTR	2.97804
cg05556923	PDGFA;PDGFA	Body;Body	2.97756
cg17463590	ARHGEF10L;ARHGEF10L	Body;Body	2.95125
cg02074797	PHF2	Body	2.94629
cg26380956	ATP1A3;ATP1A3;ATP1A3	Body;Body;Body	2.94576
cg19725111	ARMC2;ARMC2	Body;Body	2.94153
cg11575141			2.92922
cg04368843	ADAM33;ADAM33	Body;Body	2.9206
cg00964320	DAAM1	TSS1500	2.90015
cg20011940			2.89584
cg19093297	DNMT3B;DNMT3B;DNMT3B;DNMT3B;DNMT3B	5'UTR;5'UTR;5'UTR;5'UTR;5'UTR	2.88386
cg03189910			2.8792
cg27235313	SYT6;SYT6	5'UTR;5'UTR	2.83688
cg09959020	SOGA1;SOGA1	Body;5'UTR	2.79206
cg16757332	SLC24A4;SLC24A4;SLC24A4	Body;Body;Body	2.78578
cg16046891	KCNA2	TSS1500	2.78558
cg06785108	APP;APP;APP;APP;APP;APP;APP;APP;APP;APP	Body;Body;Body;Body;Body;Body;Body;Body;Body;Body	2.76253
cg14215864	DTX3	Body	2.75288
cg06308109	SNORD32B	TSS1500	2.74586
cg16220180			2.73425
cg15553814	DAB1	5'UTR	2.70961
cg14166494	CDH7;CDH7	TSS1500;TSS1500	2.70103
cg27080019			2.66685
cg19952762	KDR	3'UTR	2.65793
cg17165773			2.63442
cg24890045	FAT1	Body	2.6312
cg10958340	ADAMTS8;ADAMTS8	ExonBnd;Body	2.62572
cg19187191	FZD3;FZD3	Body;Body	2.60504
cg04434557	SPSB4	Body	2.55558
cg16816427	PALD1	Body	2.55321
cg15658966			2.5055
cg07362512			2.50208
cg13647321	LOC100128006;ARHGAP44	TSS1500;Body	2.45926
cg12934481			2.45458
cg04572289	ACOX3;ACOX3	Body;Body	2.40726
cg10928878	ANGPTL2;RALGPS1;RALGPS1;RALGPS1;RALGPS1	Body;Body;Body;Body;Body	2.40597
cg26998481	COL11A2;COL11A2;COL11A2	3'UTR;3'UTR;3'UTR	2.405
cg03350184	CELF4;CELF4;CELF4;CELF4	Body;Body;Body;Body	2.38253
cg18371471	BEGAIN;BEGAIN	Body;Body	2.3658
cg19965644	FARP1;FARP1	Body;Body	2.3569
cg13204758	KIAA1751	Body	2.29588
cg00845368	C9orf3	Body	2.28456
cg23049871	KIAA1211L	5'UTR	2.27718
cg05611648	KLHL30	Body	2.24517
cg11245989			2.24041
cg03598444			2.23135
cg22281459	PLCL2	Body	2.21832
cg20945055	NXN	Body	2.20576
cg06097861	NPY5R	Body	2.17999
cg11527695			2.17752
cg12254415	LOC285194	TSS1500	2.16725
cg26229538			2.1614
cg26085827			2.14181
cg03645750	APCDD1	Body	2.13888
cg02636348	KCNMA1;KCNMA1;KCNMA1;KCNMA1	Body;Body;Body;Body	2.12566
cg24868768	LRRC9	Body	2.12442
cg18029039	RPH3AL	Body	2.1154
cg11408613			2.10864
cg17095915			2.10636
cg18207133	JPH4;JPH4	Body;Body	2.09981
cg00911376	KCNG4	TSS1500	2.0877
cg15613148	THSD4;THSD4	TSS200;Body	2.08229
cg05932799	MPV17L2	3'UTR	2.07994
cg00830444	UNKL	Body	2.06275
cg12874963			2.00215
cg24871271	LOC100130238;GALNT9	Body;Body	1.9455
cg09740935	SLC26A9;SLC26A9	Body;Body	1.94238
cg16134070	PLA2G2C	Body	1.94187
cg06433467			1.93764
cg13481250	ARL1;ARL1	Body;Body	1.93306
cg08207660			1.92943
cg21090896			1.91673
cg14186558	RNF183	TSS1500	1.91238
cg11767711	APLP1;APLP1	TSS1500;TSS1500	1.90355
cg27639142	KLF15	5'UTR	1.88933
cg12399197	THSD4	Body	1.85838
cg13715956	LOC338694	Body	1.85833
cg16609432	CHST8;CHST8;CHST8	3'UTR;3'UTR;3'UTR	1.84762
cg04599612	SLC2A7	TSS200	1.84592
cg22310229	ABHD8	Body	1.84197
cg02522397			1.84089
cg04396711	FGD5	Body	1.81721
cg06077003	CAMTA1	Body	1.81541
cg24146349	INTS1	Body	1.79592
cg11664516	TLN2;TLN2	ExonBnd;Body	1.77851
cg24127125	CRTC3-AS1	Body	1.74775
cg21752134			1.71862
cg25636468			1.71849
cg01420517	ETNK2;ETNK2;ETNK2;ETNK2	5'UTR;Body;Body;Body	1.71468
cg19077806	PDE1A;PDE1A	Body;Body	1.70564
cg15650161	PCDH21	Body	1.69075
cg04185225			1.66294
cg01352758			1.64552
cg01651169	ARPC1A	Body	1.63243
cg20658779			1.63207
cg14652958			1.61402
cg01624761			1.61055
cg12172020			1.60998
cg14083554	AGPAT2;AGPAT2	Body;Body	1.60093
cg09269454	HSPA12A	Body	1.59472
cg17694593	CA1;CA1;CA1;CA1	TSS200;TSS200;TSS200;TSS200	1.57681
cg02035391	KIAA0226	5'UTR	1.56936
cg06007071	IFT140	Body	1.56705
cg12637744			1.52782
cg05011238	HRH2	5'UTR	1.49202
cg03631396	GBP5;GBP5	Body;Body	1.43893
cg18721683			1.42941
cg15701372			1.41393
cg16185419			1.41143
cg12331728			1.40816
cg16671079	MGAT5B;MGAT5B	Body;TSS200	1.40286
cg26791242	LOC339524;LOC339524;LOC339524;LOC339524;LOC339524	Body;TSS1500;Body;TSS1500;TSS1500	1.39937
cg24959045	ASCL5	TSS1500	1.38612
cg13866994	GFPT2	Body	1.36544
cg19828537	FAM178B;FAM178B	Body;TSS200	1.3489
cg06855707	DAPK2	Body	1.3325
cg19508622	PVT1	Body	1.31738
cg00290023			1.30232
cg05770446			1.29926
cg03200786	RNF4	5'UTR	1.2827
cg15805490			1.2729
cg03974499	MTA3	Body	1.24264
cg02513768			1.23505
cg13166116	OSBP2;OSBP2;OSBP2;OSBP2;OSBP2	Body;Body;Body;Body;5'UTR	1.23153
cg06702690			1.23026
cg15416105			1.22295
cg11975793	KCNE4	Body	1.22234
cg12647423	IL17RD;IL17RD	ExonBnd;Body	1.19234
cg09926867	CAMK1D;CAMK1D	Body;Body	1.16994
cg17106876	IQSEC3;IQSEC3	Body;Body	1.16971
cg17892736			1.16884
cg20536337			1.15532
cg11521110			1.12977
cg04117547			1.12961
cg17446457	KLB;MIR1273H	Body;Body	1.12931
cg05228810	TRIM67;TRIM67	Body;Body	1.12896
cg15108553	RNF13;RNF13	TSS1500;TSS1500	1.12737
cg07846523	C11orf44	TSS1500	1.08752
cg19142054	CETN1	TSS200	1.07264
cg23900225	GJD4	TSS200	1.04436
cg19656615	NDRG4;NDRG4;NDRG4	5'UTR;Body;5'UTR	1.03529
cg14833040			1.02311
cg12173604	ZSWIM4	Body	1.00827
cg06429103			1.00665
cg26965236			0.998617
cg01286365			0.998443
cg19996085	IL19	Body	0.990946
cg04921533			0.966439
cg12871712			0.964504
cg00088148			0.948879
cg22790835	C13orf29	TSS1500	0.941965
cg21668714	ITFG3;ITFG3;ITFG3	Body;Body;Body	0.938307
cg14355949	LOC100128714	Body	0.938004
cg22075362	SNTG2	Body	0.926372
cg09556700	SKI	Body	0.925972
cg19114920			0.919735
cg07881714	SEMA5B;SEMA5B;SEMA5B;SEMA5B;SEMA5B	Body;Body;Body;Body;Body	0.900348
cg18554976	FXYD1;FXYD1	TSS1500;TSS1500	0.895209
cg21959781			0.890966
cg07074042	RNF215	TSS1500	0.882847
cg11538602	PREX2	Body	0.878019
cg00322993			0.876186
cg06802474			0.866435
cg10313149	ZMIZ1	3'UTR	0.856397
cg14215310			0.85305
cg27616929	PREX1	Body	0.842584
cg03084308	UMOD;UMOD	Body;Body	0.830915
cg18623476	TSPYL4;TSPYL4	3'UTR;1stExon	0.819334
cg10632579	ADCY1;ADCY1	Body;Body	0.818623
cg07659529			0.814329
cg23061272			0.810523
cg09425455	TMEM184A	Body	0.796334
cg19567415	TANC2	Body	0.793587
cg18638118			0.782618
cg10515824			0.779106
cg04391716			0.774792
cg04394033			0.773226
cg16510654	C1orf64	TSS200	0.767022
cg12209487	TF	3'UTR	0.764023
cg08527460			0.754051
cg15500259			0.741747
cg01232322			0.726548
cg00754323	WNT9B	Body	0.711521
cg25236139			0.703087
cg21267507			0.694094
cg15030196			0.689347
cg18872705			0.685398
cg02298401	PCBP3;PCBP3	Body;Body	0.683942
cg06902109	EPHB2;EPHB2;EPHB2;EPHB2	Body;Body;Body;Body	0.675812
cg01801491	NRXN1;NRXN1	Body;Body	0.671775
cg02105856	PIGR;PIGR	5'UTR;1stExon	0.654919
cg01541378			0.654503
cg24392368			0.652553
cg27390501			0.650854
cg05248470	LILRB2;LILRB2	TSS1500;TSS1500	0.637183
cg10681992	TBC1D14;TBC1D14	Body;Body	0.629727
cg07486374			0.605956
cg02795691	BFSP1	Body	0.605737
cg00713427	PKN3	Body	0.605583
cg15904623	FLNC;FLNC	Body;Body	0.600242
cg17935175	MTUS2;MTUS2	Body;Body	0.599103
cg13817395	TNXB;TNXB	Body;TSS1500	0.595471
cg26002218	CKB	Body	0.578856
cg13089041	OR10H1	TSS1500	0.572723
cg16902600			0.568818
cg10519903	PLEKHG5;PLEKHG5;PLEKHG5;PLEKHG5;PLEKHG5	Body;Body;Body;Body;Body	0.55496
cg22110477			0.552704
cg00415077	GNPTG	Body	0.545952
cg16721001	EPS8L1	Body	0.544941
cg04343868			0.542426
cg13488011			0.539732
cg24948564	OAS3	Body	0.536736
cg03846767	TP73;TP73;TP73;TP73;TP73;TP73;TP73	1stExon;Body;5'UTR;1stExon;5'UTR;5'UTR;1stExon	0.53289
cg04829621			0.519988
cg14758445	ANTXRLP1;ANTXRLP1;ANTXRLP1	ExonBnd;Body;Body	0.517166
cg09181773			0.515756
cg07064056	ANK3;ANK3;ANK3	Body;Body;Body	0.511272
cg16958451	KLK3;KLK3;KLK3	Body;Body;Body	0.510172
cg11822265	CTNNA3;CTNNA3	Body;Body	0.493224
cg07482629	CORO2B;CORO2B;CORO2B;CORO2B	1stExon;5'UTR;5'UTR;Body	0.491153
cg16469463	ASPG	Body	0.485001
cg21737444	LGALS1	TSS200	0.483664
cg24135583	PTPRN2;PTPRN2;PTPRN2	Body;Body;Body	0.482059
cg19596559	C1orf101;C1orf101;C1orf101;C1orf101;C1orf101;C1orf101	ExonBnd;ExonBnd;ExonBnd;Body;Body;Body	0.479938
cg15801126			0.47334
cg04238097			0.472053
cg00640324	CAP1;CAP1;CAP1;CAP1	ExonBnd;ExonBnd;Body;Body	0.470794
cg24458300	TOLLIP	Body	0.467607
cg05790828	AGAP3	Body	0.467426
cg09704555			0.465248
cg10994397	MIB2;MIB2;MIB2;MIB2;MIB2;MIB2	Body;Body;Body;Body;Body;Body	0.464604
cg20417211	DYRK4;DYRK4;DYRK4	TSS1500;TSS1500;Body	0.460394
cg03626195			0.455629
cg12443251			0.452772
cg17397365	CD226;CD226;CD226	Body;Body;5'UTR	0.452691
cg21303460	LOC101928012	Body	0.446098
cg11457534	IGSF9B	Body	0.439568
cg06236276	SLC22A2	TSS200	0.437951
cg03971740	MPPE1;MPPE1;MPPE1;MPPE1;MPPE1	Body;Body;Body;Body;Body	0.433445
cg24603203	LOC102723833;LOC102723833;USH2A	TSS1500;TSS1500;Body	0.431106
cg20597842	APOBEC1	TSS200	0.430934
cg13688599			0.429541
cg08839907	IQSEC1	Body	0.429098
cg18327315	PTPRF;PTPRF	Body;Body	0.427266
cg16649474	RFX1	Body	0.415595
cg14542186	TTC22;TTC22	Body;Body	0.407837
cg19411086			0.406302
cg15644780	MIER3;MIER3;MIER3	TSS1500;TSS1500;TSS1500	0.40394
cg22830090	CACNB2;CACNB2;CACNB2;CACNB2;CACNB2;CACNB2;CACNB2;CACNB2;CACNB2	Body;Body;Body;Body;Body;Body;Body;Body;Body	0.403923
cg18724232	SAMD4B;SAMD4B;SAMD4B;SAMD4B	ExonBnd;ExonBnd;Body;Body	0.401197
cg18140857	SDR16C5	TSS1500	0.399929
cg03010887			0.387861
cg01564665			0.386577
cg00805678			0.386244
cg02397205	NOS1	5'UTR	0.385179
cg03645535	USP2-AS1	Body	0.380315
cg10376995			0.379797
cg22471112	TRIM2;TRIM2	TSS200;5'UTR	0.378349
cg25587200	UMODL1;UMODL1	TSS200;TSS200	0.377292
cg07190058	DIXDC1;DIXDC1	Body;Body	0.375047
cg09061993	TRAF5;TRAF5	TSS1500;TSS1500	0.34363
cg06486129			0.179584
cg15862137			0.147676

## Sheet: Data_3
Data 3. Top 100 transcription factors identified from the LISA analysis of the Co-MNCog1 network.
Transcription Factor	rank	1st Sample p-value
ESR1	1	5.47E-21
NR3C1	2	3.61E-16
YBX1	3	1.32E-15
BRDU	4	4.67E-14
EGR3	5	6.73E-14
NR2F1	6	8.93E-13
GLIS1	7	3.66E-12
TFAP2C	8	3.73E-12
LMNA	9	4.67E-12
TFAP2A	10	5.42E-12
ERG	11	4.69E-11
TERC	12	9.18E-11
ZNF436	13	9.60E-11
AR	14	5.47E-10
ZTA	15	6.77E-10
POLR2AphosphoS5	16	8.75E-10
TET2	17	8.90E-10
MYOD1	18	1.17E-09
MAX	19	2.01E-09
CRY1	20	2.96E-09
H2AFZ	21	4.16E-09
SP1	22	1.89E-08
NR2F2	23	2.96E-08
EGR2	24	4.17E-08
PRDM10	25	4.85E-08
FLI1	26	4.95E-08
SSRP1	27	5.81E-08
EBF3	28	5.92E-08
598-SKD	29	6.74E-08
KDM4A	30	6.84E-08
MYC	31	1.06E-07
SMAD4	32	1.18E-07
DDX5	33	1.42E-07
KLF15	34	1.72E-07
MXI1	35	1.73E-07
CNOT3	36	1.81E-07
KDM5B	37	1.98E-07
ZNF175	38	2.38E-07
MAZ	39	2.63E-07
E2F1	40	2.69E-07
E2F6	41	2.87E-07
IKZF2	42	2.95E-07
ZNF92	43	2.98E-07
POLR3D	44	3.02E-07
ZNF707	45	3.35E-07
RELA	46	3.64E-07
SIX2	47	5.07E-07
OTX2	48	5.47E-07
FOXA1	49	5.49E-07
HIF1A	50	5.75E-07
5HMC	51	5.86E-07
MITF	52	6.08E-07
BRD4	53	6.82E-07
ASXL1	54	6.90E-07
CBFB	55	8.93E-07
SP2	56	9.09E-07
NKX2-1	57	9.99E-07
TCF12	58	1.09E-06
KDM2B	59	1.20E-06
TFAP4	60	1.34E-06
CLOCK	61	1.91E-06
WDR5	62	2.01E-06
USF1	63	2.17E-06
CDK8	64	2.19E-06
ZBTB33	65	2.19E-06
ZNF8	66	2.32E-06
FOSL2	67	2.67E-06
RELB	68	2.77E-06
KMT2A	69	2.84E-06
MED1	70	2.95E-06
RUNX2	71	3.03E-06
T	72	3.10E-06
FOXK1	73	3.44E-06
ZBTB48	74	3.56E-06
EMX1	75	3.77E-06
TCF21	76	4.55E-06
MAML3	77	4.79E-06
LANA	78	4.99E-06
TRIM24	79	5.03E-06
None	80	5.45E-06
YY1	81	6.57E-06
RBBP5	82	7.03E-06
CARM1	83	7.52E-06
EZH2	84	8.78E-06
CBX3	85	1.07E-05
RNF2	86	1.08E-05
ZNF48	87	1.17E-05
TCF7L2	88	1.17E-05
TCF7L1	89	1.20E-05
CREB1	90	1.24E-05
GTF2I	91	1.60E-05
EGR1	92	1.62E-05
IRF5	93	1.73E-05
SUMO2	94	1.77E-05
PATZ1	95	1.85E-05
SMAD1	96	1.93E-05
KLF9	97	2.01E-05
SMC1A	98	2.07E-05
SMARCA4	99	2.10E-05
NEUROD1	100	2.12E-05

## Sheet: Data_4
Data 4. Enrichment analysis of genes from the Co-MNCog1 network using the Gene Ontology (GO) database.
ID	Term_Description	Fold_Enrichment	occurrence	support	lowest_p	highest_p	Up_regulated	Down_regulated
GO:0010842	retina layer formation	18.1898	10	0.0120482	0.0180336	0.0440679	TSPAN12, SDK2, SDK1
GO:0005001	transmembrane receptor protein tyrosine phosphatase activity	16.8905	1	0.00649351	0.047543	0.047543	PTPRF, PTPRN2, PTPRT
GO:1990535	neuron projection maintenance	15.7645	10	0.0196087	0.00416455	0.00566825	ATP1A3	APP
GO:0050732	negative regulation of peptidyl-tyrosine phosphorylation	15.7645	3	0.0060241	0.00486208	0.0104114	DMTN, PRKCZ
GO:0019898	extrinsic component of membrane	15.7645	6	0.00653623	0.0210343	0.0394794	RPH3A	UMOD
GO:0030194	positive regulation of blood coagulation	14.3313	8	0.00631072	0.0361179	0.045944	DMTN, THBS1
GO:0050730	regulation of peptidyl-tyrosine phosphorylation	13.137	10	0.00631072	0.0100646	0.0239395	PDGFA	APP
GO:0030198	extracellular matrix organization	13.137	8	0.0145468	0.0111303	0.0305257	APLP1	APP
GO:0035335	peptidyl-tyrosine dephosphorylation	11.2603	3	0.00641026	0.030187	0.0453059	PTPRF, PTPRS, PTPRT
GO:1900273	positive regulation of long-term synaptic potentiation	10.5096	10	0.00631072	0.00566825	0.00566825	ADCY1	APP
GO:0051895	negative regulation of focal adhesion assembly	10.5096	8	0.00631072	0.0365683	0.045944	DMTN, THBS1
GO:0042771	intrinsic apoptotic signaling pathway in response to DNA damage by p53 class mediator	8.75803	10	0.00631072	0.0285258	0.0285258	TP73, PHLDA3
GO:0017134	fibroblast growth factor binding	8.29708	1	0.0070922	0.0369028	0.0369028	THBS1, KLB
GO:0032570	response to progesterone	7.88223	10	0.0126214	0.00243104	0.00416553	THBS1
GO:0031996	thioesterase binding	7.88223	10	0.00631072	0.012722	0.015545	TRAF5
GO:2000008	regulation of protein localization to cell surface	7.88223	10	0.00631072	0.0166621	0.0166621	KCNAB2
GO:0004725	protein tyrosine phosphatase activity	7.72768	10	0.0175589	0.000140637	0.0162984	PTPN3, PTPRF, PTPRS, PTPRT	PTPN14
GO:0035631	CD40 receptor complex	7.16566	10	0.00631072	0.012722	0.015545	TRAF5
GO:0005201	extracellular matrix structural constituent	7.16566	3	0.00606061	0.0370909	0.0370909	TNC, THBS1, TNXB
GO:0043296	apical junction complex	6.56852	5	0.00621118	0.0372981	0.0372981	SHROOM3
GO:1905606	regulation of presynapse assembly	6.06325	6	0.00613589	0.0111303	0.0161764		APP
GO:0042613	MHC class II protein complex	6.06325	10	0.00631072	0.0129541	0.017265	HLA-DRA
GO:0062023	collagen-containing extracellular matrix	6.06325	10	0.0120847	0.000136514	0.045944	COL1A1, TNC, LGALS1, THBS1, TNXB, ADAMTS8	COL6A3
GO:0001222	transcription corepressor binding	5.91167	10	0.0122718	0.000751347	0.000751347	RUNX3, ETS1, WIZ
GO:0007416	synapse assembly	5.76749	6	0.00631978	0.00173248	0.00173248	SDK2, SDK1	FARP1
GO:0031904	endosome lumen	5.63016	10	0.00631072	0.00566825	0.00566825		APP
GO:0045821	positive regulation of glycolytic process	5.63016	10	0.00631072	0.00566825	0.00566825		APP
GO:0050890	cognition	5.37425	10	0.00631072	0.0339002	0.0339002	HLA-DRA, CUX2	APP
GO:0048661	positive regulation of smooth muscle cell proliferation	5.25482	10	0.00631072	0.00937235	0.0182127	HMOX1, THBS1
GO:0001774	microglial cell activation	5.25482	6	0.00645496	0.0111303	0.0161764		APP
GO:0030521	androgen receptor signaling pathway	5.25482	3	0.00657895	0.0485292	0.0485292	ZMIZ1
GO:0010718	positive regulation of epithelial to mesenchymal transition	5.14058	10	0.0120847	0.0171132	0.0339567	COL1A1, DAB2	AXIN2
GO:0005905	clathrin-coated pit	5.08531	10	0.0126214	0.000732232	0.00100588	DAB2, REPS1
GO:0006470	protein dephosphorylation	4.98875	7	0.00606061	0.0354628	0.0424484	PTPN3, PTPRN2, PTPRS, PTPRT	PTPN14
GO:0050921	positive regulation of chemotaxis	4.92639	10	0.00631072	0.00518164	0.00924148	THBS1
GO:0030658	transport vesicle membrane	4.92639	10	0.00631072	0.0129541	0.017265	HLA-DRA
GO:0010803	regulation of tumor necrosis factor-mediated signaling pathway	4.92639	6	0.00613589	0.0277244	0.0338714		MIB2
GO:0016581	NuRD complex	4.92639	10	0.00631072	0.0284572	0.0377785		MTA3
GO:0003779	actin binding	4.63661	10	0.0130725	7.9137e-05	0.00699627	DMTN, KCNMA1, SPTBN2, MICAL2, ARPC1A, CGN, TRPV4
GO:0031012	extracellular matrix	4.63661	10	0.00631072	0.000989572	0.00337665	THBS1, LAMC3	COL6A3
GO:0050729	positive regulation of inflammatory response	4.50413	4	0.00623543	0.00883666	0.0369476	ETS1, LGALS1, ZBP1	APP
GO:0007010	cytoskeleton organization	4.37902	1	0.00621118	0.00412777	0.00412777	DPYSL2, DMTN, MICAL2	PDZD8
GO:0046332	SMAD binding	4.37902	10	0.00631072	0.030107	0.030107	DAB2, ZMIZ1
GO:0031491	nucleosome binding	4.37902	7	0.00649351	0.0330232	0.0330232		RNF4
GO:0007094	mitotic spindle assembly checkpoint signaling	4.37902	2	0.00635234	0.035332	0.035332	MAD1L1
GO:0008630	intrinsic apoptotic signaling pathway in response to DNA damage	4.14854	1	0.0060241	0.0482284	0.0482284	TP73
GO:1904646	cellular response to amyloid-beta	4.04217	4	0.00662979	0.0255988	0.0425681	ATP1A3	APP
GO:0043536	positive regulation of blood vessel endothelial cell migration	3.94111	10	0.00631072	0.013984	0.0255988	ETS1, THBS1
GO:0001968	fibronectin binding	3.94111	3	0.00606061	0.0178576	0.0178576	THBS1
GO:0005178	integrin binding	3.90209	3	0.00606061	0.00915144	0.00915144	TNC, THBS1, TNXB, ADAMTS8	CD226
GO:0051056	regulation of small GTPase mediated signal transduction	3.86384	4	0.00631072	0.000176672	0.00579354	ARHGEF17, ARHGAP40	BCR, PREX1, PREX2
GO:0001666	response to hypoxia	3.75344	4	0.00604235	0.00321049	0.00321049	KCNMA1	CBFA2T3, ARNT2
GO:2000353	positive regulation of endothelial cell apoptotic process	3.75344	10	0.00631072	0.00682084	0.012968	THBS1
GO:0060395	SMAD protein signal transduction	3.75344	10	0.00631072	0.0150935	0.0150935	ZMIZ1
GO:0006897	endocytosis	3.66615	3	0.00684932	0.000938033	0.000938033	DPYSL2	APP
GO:0030424	axon	3.66615	4	0.00623543	0.0111303	0.0152403	ATP1A3, KCNA2, PTPRS, SCN2A, MAPK8IP3	APP
GO:0031093	platelet alpha granule lumen	3.63795	10	0.00631072	0.00103588	0.00352973	PDGFA, THBS1	APP
GO:0000981	DNA-binding transcription factor activity, RNA polymerase II-specific	3.6157	10	0.0297123	0.00027606	0.005261	RUNX3, ETS1, TP73, WIZ	ARNT2
GO:0002040	sprouting angiogenesis	3.58283	10	0.00631072	0.00682084	0.012968	THBS1
GO:0051247	positive regulation of protein metabolic process	3.42706	10	0.0126214	0.00682084	0.0109134		APP
GO:0070555	response to interleukin-1	3.28426	7	0.00621118	0.0197612	0.0416205		APP
GO:0042605	peptide antigen binding	3.28426	10	0.00631072	0.0198395	0.0264356	HLA-DRA
GO:1990000	amyloid fibril formation	3.15289	6	0.00613589	0.0197612	0.0276656		APP
GO:0050808	synapse organization	3.15289	1	0.00641026	0.0230547	0.0230547		APP
GO:0090090	negative regulation of canonical Wnt signaling pathway	3.09107	2	0.00635234	0.027512	0.027512	DAB2, SOX13, NKD1	AXIN2
GO:0031333	negative regulation of protein-containing complex assembly	3.03163	1	0.0070922	0.0416205	0.0416205	PRKCZ
GO:0005788	endoplasmic reticulum lumen	2.90857	4	0.00623543	0.000136514	0.047543	COL1A1, HRC, TNC, LGALS1, PDGFA, THBS1, TSPAN15, WNT4	APP, COL6A3
GO:0070374	positive regulation of ERK1 and ERK2 cascade	2.85588	10	0.00631072	0.0100646	0.0239395	PDGFA, PRKCZ, THPO, NDRG4	APP
GO:0043235	receptor complex	2.83533	10	0.0117059	0.0327645	0.0489254	IL4R, PTPRN2, VIPR1, ABCG8	APP
GO:0043537	negative regulation of blood vessel endothelial cell migration	2.81508	10	0.00631072	0.00905184	0.017417	THBS1
GO:0000165	MAPK cascade	2.76569	2	0.00611764	0.0142685	0.0142685	PTPN3	TAOK3
GO:0098553	lumenal side of endoplasmic reticulum membrane	2.71801	10	0.00631072	0.0218721	0.0291395	HLA-DRA
GO:0007155	cell adhesion	2.62741	2	0.00604235	0.0178008	0.0183875	PTPRF, TNXB, IL32, GRHL2	FAT1
GO:0042169	SH2 domain binding	2.62741	1	0.0070922	0.0416205	0.0416205	TRPV4
GO:0010468	regulation of gene expression	2.58434	1	0.00621118	0.0457831	0.0457831	TP73	APP
GO:0032588	trans-Golgi network membrane	2.51561	4	0.0064946	0.0107591	0.0107591	HLA-DRA	APP, ARL1
GO:0007179	transforming growth factor beta receptor signaling pathway	2.4253	10	0.00631072	0.00165399	0.00165399	DAB2, ZMIZ1
GO:0005096	GTPase activator activity	2.33548	4	0.00631072	0.0071917	0.0103222	ARHGAP40	BCR, PREX1, PREX2
GO:0000976	transcription cis-regulatory region binding	2.32972	10	0.0126214	0.00774058	0.00774058	ETS1, HNF1A, TP73, SOX13, KLF15, PRDM16
GO:0005085	guanyl-nucleotide exchange factor activity	2.3183	4	0.00631072	0.00112745	0.0178008	ARHGEF17	BCR, FARP1, PREX1, PREX2
GO:0003180	aortic valve morphogenesis	2.25207	7	0.00621118	0.0116456	0.0228087		AXIN2
GO:0003700	DNA-binding transcription factor activity	2.14482	10	0.0139415	0.00171806	0.00171806	RUNX3, ETS1, NPAS2, HNF1A, TP73, SOX13, GRHL2	ARNT2
GO:0032755	positive regulation of interleukin-6 production	2.13033	1	0.00641026	0.0385456	0.0385456	LEP	APP
GO:0005856	cytoskeleton	2.11131	10	0.00631072	0.0364355	0.0364355	LRRFIP1, FSCN3, SHROOM3
GO:0006468	protein phosphorylation	1.97762	10	0.0184077	0.00200943	0.0118236	RUNX3, PRKCZ, PKN3, WNK2	APP, BCR, TAOK3
GO:0032760	positive regulation of tumor necrosis factor production	1.94623	10	0.00631072	0.00134605	0.00416455	THBS1	APP
GO:0016477	cell migration	1.90699	3	0.00606061	0.0135411	0.0135411	PTPRF, THBS1	FAT1
GO:1902895	positive regulation of miRNA transcription	1.87672	10	0.00631072	0.0339567	0.0339567	ETS1
GO:0043065	positive regulation of apoptotic process	1.85029	3	0.00606061	0.0376192	0.0376192	KCNMA1, LGALS1, RPS6KA2, PHLDA3, ZBP1
GO:0002020	protease binding	1.81201	3	0.00606061	0.00778976	0.00778976	COL1A1, THBS1
GO:0005874	microtubule	1.79142	1	0.00641026	0.0104114	0.0104114	DPYSL2, KCNAB2
GO:0030335	positive regulation of cell migration	1.78129	3	0.00606061	0.027941	0.027941	COL1A1, DAB2, PDGFA, THBS1
GO:0003714	transcription corepressor activity	1.76468	10	0.00631072	0.0284572	0.0377785	DNMT3B, WNT4	CBFA2T3
GO:0140297	DNA-binding transcription factor binding	1.76468	10	0.00631072	0.0284572	0.0377785	TP73, PRDM16, GRHL2
GO:0012507	ER to Golgi transport vesicle membrane	1.75161	1	0.00657895	0.0425661	0.0425661	HLA-DRA
GO:0005102	signaling receptor binding	1.45967	1	0.00621118	0.0407761	0.0407761	DMTN, CCL17, TNFSF9	APP
GO:0001228	DNA-binding transcription activator activity, RNA polymerase II-specific	1.41767	10	0.00631072	0.0178153	0.0178153	ETS1, HNF1A, TP73, KLF15, GRHL2
GO:0061629	RNA polymerase II-specific DNA-binding transcription factor binding	1.01706	10	0.00631072	0.0477312	0.0477312	ETS1, TP73

## Sheet: Data_5
Data 5. Enrichment analysis of genes from the Co-MNCog1 network using theReactome database.
ID	Term_Description	Fold_Enrichment	occurrence	support	lowest_p	highest_p	Up_regulated	Down_regulated
R-HSA-8849932	Synaptic adhesion-like molecules	11.2603	7	0.0070922	0.0124138	0.0396121	LRFN3, PTPRF, PTPRS
R-HSA-844456	The NLRP3 inflammasome	9.85279	10	0.00631072	0.0115169	0.014797	HMOX1	APP
R-HSA-2173791	TGF-beta receptor signaling in EMT (epithelial to mesenchymal transition)	9.85279	10	0.00683557	0.0151679	0.0151679	CGN, PRKCZ
R-HSA-1839117	Signaling by cytosolic FGFR1 fusion mutants	9.27321	10	0.0126214	0.00887498	0.0125745	LRRFIP1	BCR
R-HSA-5083635	Defective B3GALTL causes PpS	9.00826	9	0.00621118	0.000238873	0.0435546	ADAMTS2, ADAMTS8, THBS1, THSD4
R-HSA-3000170	Syndecan interactions	8.75803	10	0.00697076	8.58302e-07	0.0199571	COL1A1, THBS1, TNC
R-HSA-5173214	O-glycosylation of TSR domain-containing proteins	8.75803	9	0.00621118	0.000238873	0.0435546	ADAMTS2, ADAMTS8, THBS1, THSD4
R-HSA-388844	Receptor-type tyrosine-protein phosphatases	7.88223	7	0.00684932	0.0124138	0.0396121	PTPRF, PTPRS
R-HSA-8951936	RUNX3 regulates p14-ARF	7.88223	10	0.00631072	0.0129749	0.0129749	RUNX3
R-HSA-622312	Inflammasomes	7.50689	10	0.00631072	0.0115169	0.014797	HMOX1	APP
R-HSA-9609523	Insertion of tail-anchored proteins into the endoplasmic reticulum membrane	7.50689	10	0.00631072	0.0115169	0.014797	HMOX1	APP
R-HSA-196025	Formation of annular gap junctions	7.16566	10	0.0130725	0.00598737	0.00627652	DAB2
R-HSA-3000171	Non-integrin membrane-ECM interactions	6.67986	10	0.0120921	1.10413e-05	0.00324543	COL1A1, LAMC3, PDGFA, THBS1, TNC
R-HSA-190873	Gap junction degradation	6.56852	10	0.0130725	0.00598737	0.00627652	DAB2
R-HSA-6803207	TP53 Regulates Transcription of Caspase Activators and Caspases	6.56852	2	0.00604235	0.0430207	0.0465893	TP73
R-HSA-6803211	TP53 Regulates Transcription of Death Receptors and Ligands	6.56852	2	0.00604235	0.0430207	0.0465893	TP73
R-HSA-3000178	ECM proteoglycans	6.22281	4	0.00613589	2.06625e-05	0.00327807	COL1A1, PTPRS, TNC, TNXB	APP, COL6A3
R-HSA-9664424	Cell recruitment (pro-inflammatory response)	6.06325	10	0.00631072	0.0115169	0.014797	HMOX1	APP
R-HSA-9660826	Purinergic signaling in leishmaniasis infection	6.06325	10	0.00631072	0.0115169	0.014797	HMOX1	APP
R-HSA-9013026	RHOB GTPase cycle	5.71176	9	0.0070922	4.46234e-06	0.0188795	ARHGEF17, PKN3	BCR, DAAM1, PREX1
R-HSA-8941856	RUNX3 regulates NOTCH signaling	5.63016	10	0.00631072	0.0174673	0.0174673	RUNX3
R-HSA-9710421	Defective pyroptosis	5.63016	3	0.00621118	0.0245178	0.0302212	DNMT3B
R-HSA-6804759	Regulation of TP53 Activity through Association with Co-factors	5.63016	2	0.00604235	0.0430207	0.0465893	TP73
R-HSA-6803205	TP53 regulates transcription of several additional cell death genes whose specific roles in p53-dependent apoptosis remain uncertain	5.63016	2	0.00604235	0.0430207	0.0465893	TP73
R-HSA-9013106	RHOC GTPase cycle	5.55087	9	0.0070922	8.05895e-08	0.0188795	ARHGEF17, PKN3	BCR, DAAM1, PREX1
R-HSA-9843743	Transcriptional regulation of brown and beige adipocyte differentiation	5.25482	10	0.00667141	0.000280288	0.000484964	PRDM16	MTA3
R-HSA-9844594	Transcriptional regulation of brown and beige adipocyte differentiation by EBF2	5.25482	10	0.00667141	0.000280288	0.000484964	PRDM16	MTA3
R-HSA-1839124	FGFR1 mutant receptor activation	5.25482	10	0.0126214	0.0166395	0.0271999	LRRFIP1	BCR
R-HSA-8874081	MET activates PTK2 signaling	5.25482	3	0.00606061	0.0167684	0.0167684	COL1A1, LAMC3
R-HSA-212300	PRC2 methylates histones and DNA	5.25482	3	0.00621118	0.0245178	0.0302212	DNMT3B
R-HSA-2691232	Constitutive Signaling by NOTCH1 HD Domain Mutants	5.25482	10	0.00631072	0.0261734	0.0325923		MIB2
R-HSA-2691230	Signaling by NOTCH1 HD Domain Mutants in Cancer	5.25482	10	0.00631072	0.0261734	0.0325923		MIB2
R-HSA-5173105	O-linked glycosylation	5.20525	9	0.00621118	0.000152153	0.0133808	ADAMTS2, ADAMTS8, GALNT14, GALNT8, THBS1, THSD4	ST6GAL1
R-HSA-437239	Recycling pathway of L1	5.14058	10	0.00653623	0.00208706	0.0494814	DPYSL2, RPS6KA2, TUBA3E
R-HSA-2122948	Activated NOTCH1 Transmits Signal to the Nucleus	5.08531	10	0.00631072	0.0431443	0.0497365	DLK1	MIB2
R-HSA-75892	Platelet Adhesion to exposed collagen	4.92639	3	0.00606061	0.00522334	0.00522334	COL1A1
R-HSA-4655427	SUMOylation of DNA methylation proteins	4.92639	10	0.00631072	0.0159813	0.0342033	DNMT3B
R-HSA-3906995	Diseases associated with O-glycosylation of proteins	4.8506	5	0.00649351	0.000870915	0.00125064	ADAMTS2, ADAMTS8, THBS1, THSD4
R-HSA-201722	Formation of the beta-catenin:TCF transactivating complex	4.77711	10	0.00631072	0.0166395	0.0271999	RUNX3	AXIN2
R-HSA-427389	ERCC6 (CSB) and EHMT2 (G9a) positively regulate rRNA expression	4.37902	10	0.00631072	0.00887498	0.0125745		MTA3
R-HSA-8980692	RHOA GTPase cycle	4.28965	9	0.00649351	3.15492e-11	0.0356812	ARHGAP40, ARHGEF17, PKN3	BCR, DAAM1, FARP1, PREX1, PREX2
R-HSA-5655302	Signaling by FGFR1 in disease	4.26066	10	0.0126214	0.019219	0.0271999	LRRFIP1	BCR
R-HSA-5218921	VEGFR2 mediated cell proliferation	4.14854	10	0.00645188	0.0151679	0.0151679	PRKCZ
R-HSA-8875878	MET promotes cell motility	3.84499	3	0.00606061	0.0283655	0.0283655	COL1A1, LAMC3
R-HSA-216083	Integrin cell surface interactions	3.70928	3	0.00606061	2.44026e-05	2.44026e-05	COL1A1, THBS1, TNC	COL6A3
R-HSA-9013148	CDC42 GTPase cycle	3.58283	6	0.00613589	4.46234e-06	0.00612169	ARHGAP40	BCR, DAAM1, FARP1, PREX1, PREX2, SH3PXD2A
R-HSA-202430	Translocation of ZAP-70 to Immunological synapse	3.58283	10	0.00631072	0.0144063	0.0191948	HLA-DRA
R-HSA-2979096	NOTCH2 Activation and Transmission of Signal to the Nucleus	3.58283	10	0.00631072	0.0331611	0.0382403		MIB2
R-HSA-1474244	Extracellular matrix organization	3.42706	10	0.0178395	5.49194e-05	0.00290824	ADAMTS2, ADAMTS8, COL1A1, LAMC3, PDGFA, PTPRS, THBS1, TNC, TNXB	APP, CAPN13, COL6A3, SH3PXD2A
R-HSA-9013423	RAC3 GTPase cycle	3.42706	2	0.00604235	0.000720075	0.00118198	IL32	BCR, PREX1, TAOK3
R-HSA-190828	Gap junction trafficking	3.35414	8	0.00613589	0.0494814	0.0494814	DAB2, TUBA3E
R-HSA-373760	L1CAM interactions	3.33993	4	0.0064946	0.00720048	0.00720048	DPYSL2, RPS6KA2, SCN2A, SPTBN2, TUBA3E
R-HSA-202427	Phosphorylation of CD3 and TCR zeta chains	3.15289	10	0.00631072	0.0144063	0.0191948	HLA-DRA
R-HSA-389960	Formation of tubulin folding intermediates by CCT/TriC	3.15289	1	0.00641026	0.0329502	0.0329502	TUBA3E
R-HSA-9013507	NOTCH3 Activation and Transmission of Signal to the Nucleus	3.15289	10	0.00631072	0.0344166	0.0396845		MIB2
R-HSA-157858	Gap junction trafficking and regulation	3.15289	8	0.00613589	0.0494814	0.0494814	DAB2, TUBA3E
R-HSA-389948	PD-1 signaling	3.03163	10	0.00631072	0.0144063	0.0191948	HLA-DRA
R-HSA-5357786	TNFR1-induced proapoptotic signaling	3.03163	1	0.00649351	0.0498927	0.0498927		MIB2
R-HSA-8957275	Post-translational protein phosphorylation	3.00275	3	0.00606061	0.00422878	0.00422878	HRC, LGALS1, TNC	APP
R-HSA-5668914	Diseases of metabolism	2.95584	9	0.00621118	0.000870915	0.0435546	ADAMTS2, ADAMTS8, CYP19A1, CYP4F22, GALNS, TBXAS1, THBS1, THSD4	EXT1
R-HSA-3781865	Diseases of glycosylation	2.81508	5	0.00649351	0.00626412	0.00857411	ADAMTS2, ADAMTS8, THBS1, THSD4	EXT1
R-HSA-168643	Nucleotide-binding domain, leucine rich repeat containing receptor (NLR) signaling pathways	2.76569	3	0.00649351	0.0468729	0.0468729	HMOX1	APP
R-HSA-9013404	RAC2 GTPase cycle	2.74962	2	0.00604235	0.0155962	0.0180092		BCR, PREX1, TAOK3
R-HSA-425407	SLC-mediated transmembrane transport	2.66067	4	0.00611764	0.0108124	0.0158807	SLC12A7, SLC13A4, SLC2A7, SLC34A1, SLC5A1, SLC9A3	SLC47A2, SLC6A6
R-HSA-381426	Regulation of Insulin-like Growth Factor (IGF) transport and uptake by Insulin-like Growth Factor Binding Proteins (IGFBPs)	2.58434	3	0.00606061	0.00522334	0.00522334	HRC, LGALS1, TNC	APP
R-HSA-1226099	Signaling by FGFR in disease	2.54265	10	0.00631072	0.0325251	0.0459639	LRRFIP1	BCR
R-HSA-114608	Platelet degranulation	2.52231	10	0.00631072	0.00259423	0.00878274	PDGFA, THBS1	APP, CAP1
R-HSA-389958	Cooperation of Prefoldin and TriC/CCT in actin and tubulin folding	2.4632	1	0.00641026	0.0329502	0.0329502	TUBA3E
R-HSA-76005	Response to elevated platelet cytosolic Ca2+	2.4253	10	0.00631072	0.00259423	0.00878274	PDGFA, THBS1	APP, CAP1
R-HSA-3214815	HDACs deacetylate histones	2.38855	10	0.00631072	0.0166395	0.0271999		MTA3
R-HSA-1980145	Signaling by NOTCH2	2.38855	10	0.00631072	0.0431443	0.0497365		MIB2
R-HSA-400253	Circadian Clock	2.2847	10	0.00631072	0.0129749	0.0129749	KLF15, NPAS2
R-HSA-9013149	RAC1 GTPase cycle	2.17741	5	0.00621118	2.63355e-05	0.0120866		BCR, FARP1, PREX1, PREX2, TAOK3
R-HSA-9843745	Adipogenesis	2.16942	10	0.00631072	0.00887498	0.0125745	LEP, PRDM16	MTA3
R-HSA-76002	Platelet activation, signaling and aggregation	2.14691	10	0.015372	0.0132903	0.0330415	COL1A1, PDGFA, PRKCZ, THBS1, THPO	APP, CAP1
R-HSA-202433	Generation of second messenger molecules	2.13033	10	0.00631072	0.0221055	0.0294436	HLA-DRA
R-HSA-2219530	Constitutive Signaling by Aberrant PI3K in Cancer	2.02108	1	0.0070922	0.0307027	0.0307027	KLB, PDGFA
R-HSA-5673001	RAF/MAP kinase cascade	1.99912	9	0.00621118	0.0174338	0.0235405	IL17RD, KLB, PDGFA, PTPN3, SHC3, SPTBN2	RASAL2
R-HSA-416482	G alpha (12/13) signalling events	1.97056	2	0.00631072	0.0221398	0.0221398	ARHGEF17	PREX1
R-HSA-5684996	MAPK1/MAPK3 signaling	1.95658	9	0.00621118	0.0174338	0.0235405	IL17RD, KLB, PDGFA, PTPN3, SHC3, SPTBN2	RASAL2
R-HSA-74752	Signaling by Insulin receptor	1.94623	1	0.0070922	0.0307027	0.0307027	KLB, PTPRF
R-HSA-195258	RHO GTPase Effectors	1.81898	1	0.00641026	0.02731	0.02731	ARPC1A, MAD1L1, PKN3, PRKCZ, TUBA3E	DAAM1
R-HSA-109704	PI3K Cascade	1.79142	1	0.0070922	0.0210569	0.0210569	KLB
R-HSA-73762	RNA Polymerase I Transcription Initiation	1.79142	10	0.00631072	0.0228066	0.0322621		MTA3
R-HSA-427413	NoRC negatively regulates rRNA expression	1.75161	10	0.00631072	0.0228066	0.0322621	DNMT3B
R-HSA-5250913	Positive epigenetic regulation of rRNA expression	1.75161	10	0.00631072	0.0228066	0.0322621		MTA3
R-HSA-8856828	Clathrin-mediated endocytosis	1.65361	10	0.0130725	0.0106564	0.0116793	ARPC1A, DAB2, REPS1
R-HSA-112399	IRS-mediated signalling	1.64213	1	0.0070922	0.0210569	0.0210569	KLB
R-HSA-5250941	Negative epigenetic regulation of rRNA expression	1.64213	10	0.00631072	0.0234857	0.033213	DNMT3B
R-HSA-193704	p75 NTR receptor-mediated signalling	1.6252	2	0.00631072	0.02731	0.0294477	ARHGEF17	PREX1
R-HSA-975871	MyD88 cascade initiated on plasma membrane	1.6252	1	0.0070922	0.0307027	0.0307027	RPS6KA2	APP
R-HSA-168142	Toll Like Receptor 10 (TLR10) Cascade	1.6252	1	0.0070922	0.0307027	0.0307027	RPS6KA2	APP
R-HSA-168176	Toll Like Receptor 5 (TLR5) Cascade	1.6252	1	0.0070922	0.0307027	0.0307027	RPS6KA2	APP
R-HSA-73854	RNA Polymerase I Promoter Clearance	1.60862	10	0.00631072	0.0234857	0.033213		MTA3
R-HSA-73864	RNA Polymerase I Transcription	1.57645	10	0.00631072	0.0234857	0.033213		MTA3
R-HSA-975138	TRAF6 mediated induction of NFkB and MAP kinases upon TLR7/8 or 9 activation	1.54554	1	0.0070922	0.0307027	0.0307027	RPS6KA2	APP
R-HSA-8856825	Cargo recognition for clathrin-mediated endocytosis	1.53053	10	0.0130725	0.00598737	0.00627652	DAB2, REPS1
R-HSA-975155	MyD88 dependent cascade initiated on endosome	1.53053	1	0.0070922	0.0307027	0.0307027	RPS6KA2	APP
R-HSA-2428928	IRS-related events triggered by IGF1R	1.51581	1	0.0070922	0.0210569	0.0210569	KLB
R-HSA-168181	Toll Like Receptor 7/8 (TLR7/8) Cascade	1.51581	1	0.0070922	0.0307027	0.0307027	RPS6KA2	APP
R-HSA-2219528	PI3K/AKT Signaling in Cancer	1.50138	1	0.0070922	0.0307027	0.0307027	KLB, PDGFA
R-HSA-2428924	IGF1R signaling cascade	1.48721	1	0.0070922	0.0210569	0.0210569	KLB
R-HSA-6811558	PI5P, PP2A and IER3 Regulate PI3K/AKT Signaling	1.48721	1	0.0070922	0.0307027	0.0307027	KLB, PDGFA
R-HSA-168164	Toll Like Receptor 3 (TLR3) Cascade	1.48721	1	0.0070922	0.0307027	0.0307027	RPS6KA2	APP
R-HSA-168138	Toll Like Receptor 9 (TLR9) Cascade	1.47331	1	0.0070922	0.0307027	0.0307027	RPS6KA2	APP
R-HSA-74751	Insulin receptor signalling cascade	1.45967	1	0.0070922	0.0210569	0.0210569	KLB
R-HSA-2404192	Signaling by Type 1 Insulin-like Growth Factor 1 Receptor (IGF1R)	1.45967	1	0.0070922	0.0210569	0.0210569	KLB
R-HSA-166166	MyD88-independent TLR4 cascade	1.43313	1	0.0070922	0.0307027	0.0307027	RPS6KA2	APP
R-HSA-937061	TRIF (TICAM1)-mediated TLR4 signaling	1.43313	1	0.0070922	0.0307027	0.0307027	RPS6KA2	APP
R-HSA-199418	Negative regulation of the PI3K/AKT network	1.39508	1	0.0070922	0.0307027	0.0307027	KLB, PDGFA
R-HSA-166058	MyD88:MAL(TIRAP) cascade initiated on plasma membrane	1.38285	1	0.0070922	0.0307027	0.0307027	RPS6KA2	APP
R-HSA-168188	Toll Like Receptor TLR6:TLR2 Cascade	1.38285	1	0.0070922	0.0307027	0.0307027	RPS6KA2	APP
R-HSA-181438	Toll Like Receptor 2 (TLR2) Cascade	1.34739	1	0.0070922	0.0307027	0.0307027	RPS6KA2	APP
R-HSA-168179	Toll Like Receptor TLR1:TLR2 Cascade	1.34739	1	0.0070922	0.0307027	0.0307027	RPS6KA2	APP
R-HSA-8878166	Transcriptional regulation by RUNX2	1.33597	10	0.00631072	0.0261734	0.0325923	COL1A1, HIVEP3
R-HSA-8943724	Regulation of PTEN gene transcription	1.29217	10	0.00631072	0.0325251	0.0459639		MTA3
R-HSA-212165	Epigenetic regulation of gene expression	1.26116	10	0.00697076	0.00887498	0.0125745	DNMT3B	MTA3
R-HSA-1257604	PIP3 activates AKT signaling	1.10241	1	0.0070922	0.0210569	0.0210569	KLB, PDGFA	MTA3, PREX2
R-HSA-166016	Toll Like Receptor 4 (TLR4) Cascade	1.07241	1	0.0070922	0.0467257	0.0467257	RPS6KA2	APP
R-HSA-190236	Signaling by FGFR	0.895708	1	0.0070922	0.0307027	0.0307027	KLB
R-HSA-3247509	Chromatin modifying enzymes	0.784301	10	0.00631072	0.0166395	0.0271999	PRDM16	MTA3
R-HSA-4839726	Chromatin organization	0.784301	10	0.00631072	0.0166395	0.0271999	PRDM16	MTA3
