# Supplementary material for: Cord blood co-methylation network mediates the association between prenatal diet and cognition at age 2 years: A birth cohort study
Source: Research Square preprint supplement (doi:10.21203/rs.3.rs-7747095/v1), 2025-10-20
Supplement: Supplementary file 2 [file 66ab93f501173497123919a3.docx]

**Cord blood co-methylation network mediates the association between prenatal diet and cognition at age 2 years: A birth cohort study**

Supplementary material

Table of Contents

[Figure S1. Summary table and volcano plot from the epigenome-wide association study (EWAS) of cognition. 2](#_Toc210119337)

[Figure S2. Construction of co-methylation networks using Weighted Gene Co-expression Network Analysis (WGCNA). 3](#_Toc210119338)

[Table S1. Associations between prenatal dietary factors and child outcomes (cognition and language) at 2 years old 4](#_Toc210119339)

[Table S2. Sensitivity analysis of the mediating role of Co-MNcog1 in the relationship between prenatal diet and children’s Bayley III scores. 5](#_Toc210119340)

[Table S3. Interventional Effects of prenatal wholefood dietary pattern on children’s cognition (Bayley-III) through maternal GlycA (M1) at 28 weeks of gestation and Co-MNcog1 (M2) at cord blood. 6](#_Toc210119341)

[Table S4. APrON Neurotox sub-sample characteristics . 6](#_Toc210119342)

[Table S5. Association between the Co-MNcog1 network and Bayley-III and parent reported outcomes at age 2 years in the APrON cohort 7](#_Toc210119343)

| CpG | Chromosome/position | Gene | logFC |
| --- | --- | --- | --- |
| cg00125947 | chr12, 133324413 | ANKLE2 (body) | 0.0265 |
| cg24094073 | chr6, 168376325 |  | -0.0132 |
| cg11131384 | chr18, 48188506 | MAPK4 (5'UTR; | -0.022 |
| cg27068297 | chr15, 43813642 | MAP1A;RNU6-28P5'UTR;Body | 0.011 |
| cg03187614 | chr11, 1965140 |  | 0.127 |


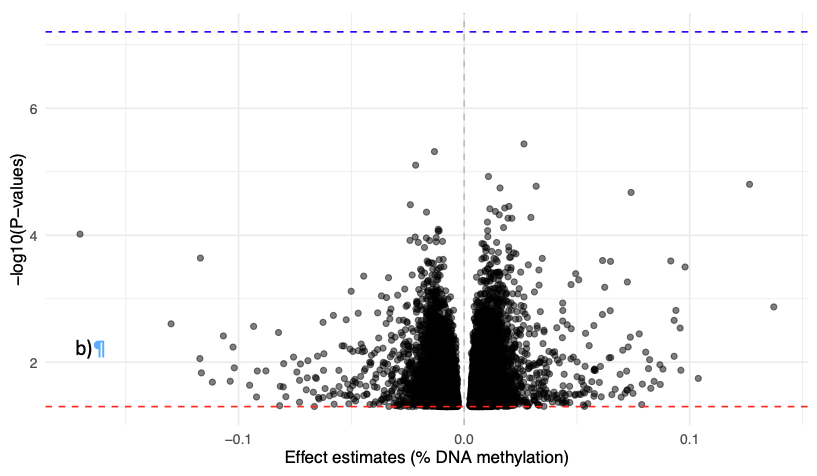


**B**

**A**

#### Figure S1. Summary table and volcano plot from the epigenome-wide association study (EWAS) of cognition.

a) The top five CpGs including chromosome number, position, gene annotation, and log fold change. b) Volcano plot showing 20,043 unadjusted CpG p-values, with direction of association between DNA methylation variation and the continuous cognitive outcome (Bayley-III at age 2 years). No CpGs passed the FDR threshold, with the lowest adjusted p-value being 0.99. The blue line indicates the Bonferroni threshold, and the red line indicates the conventional unadjusted significance threshold (p < 0.05). The x-axis represents the percentage difference in methylation per one-unit increase in the cognitive subscale score, and the y-axis represents –log10 (p-value).


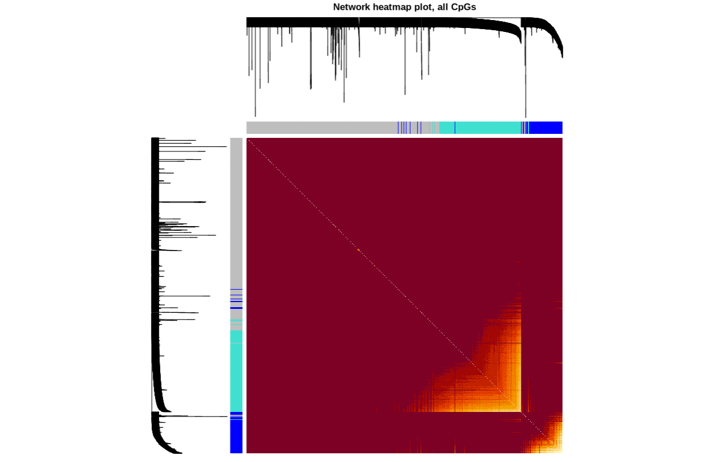


A


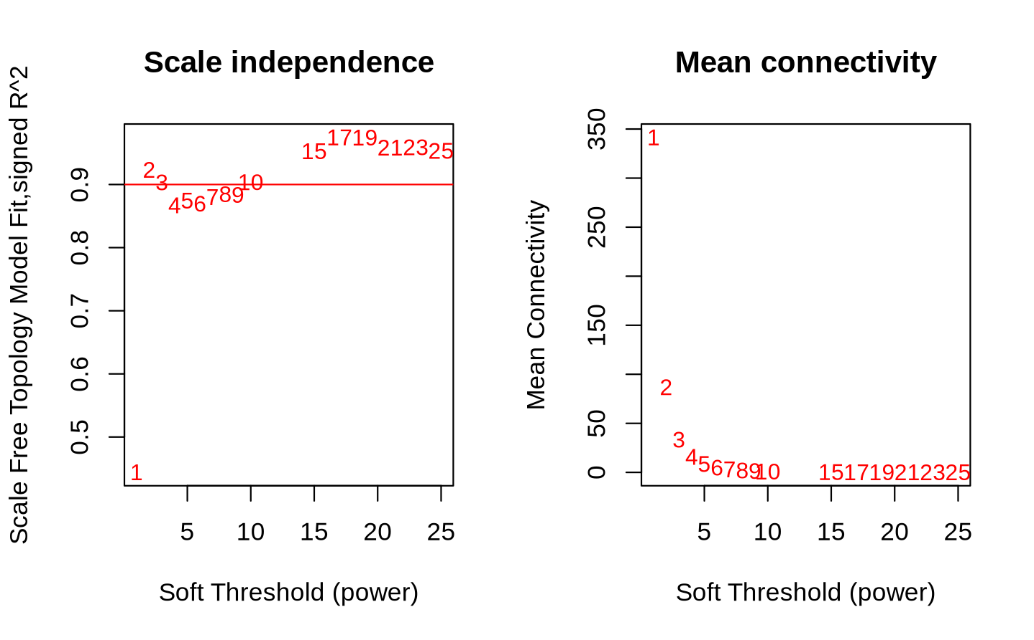


B

C

#### **Figure S2.** *Construction of co-methylation networks using Weighted Gene Co-expression Network Analysis (WGCNA).*

a) Sample clustering to detect outliers (none observed). b) Scale-free topology fit index and mean connectivity used to select the optimal power parameter. c) Cluster dendrogram built by hierarchical clustering of the dissimilarity (1–Topological Overlap Matrix) matrix, where height represents dissimilarity. Each colour corresponds to one co-methylation module; grey denotes unclustered CpGs. d) Heatmap representation of module topological overlap. Pale shades indicate minimal topological overlap, while deeper red shades indicate stronger overlap.

#### Table S1. Associations between prenatal dietary factors and child outcomes (cognition and language) at 2 years old

| Prenatal maternal factors | Child Cognition scores | | |  | Child Receptive Communication score | | |  | Child Expressive Communication score | | |
| --- | --- | --- | --- | --- | --- | --- | --- | --- | --- | --- | --- |
| β | 95% CI | p-value |  | β | 95% CI | p-value |  | β | 95% CI LL | p-value |
| Wholefoods dietary pattern | 0.71 | 0.40, 1.02 | <0.001 |  | 1.02 | 0.68, 1.36 | <0.001 |  | 1.00 | 0.56, 1.43 | <0.001 |
| Dietary inflammatory index | -0.39 | -0.59, -0.19 | <0.001 |  | -0.46 | -0.68, -0.24 | <0.001 |  | -0.31 | -0.60, -0.02 | 0.039 |
| Processed dietary pattern | -0.83 | -1.41,-0.25 | 0.005 |  | -1.24 | -1.89, -0.59 | <0.001 |  | -1.10 | -1.94, -0.26 | 0.010 |

Adjusted for dietary energy intake, child’s post-conceptional age at the time of Bayley-III testing, Bayley-III tester experience, child’s sex at birth. Such association was previously published by (13, 53)

#### Table S2. Sensitivity analysis of the mediating role of Co-MNcog1 in the relationship between prenatal diet and children’s Bayley III scores.

|  |  | Child’s Bayley-III raw score | | | | | |
| --- | --- | --- | --- | --- | --- | --- | --- |
|  |  | Cognition | | Receptive communication | | Expressive communication | |
| Prenatal dietary factors | Effects | β (95%CI) | p-value | β (95%CI) | p-value | β (95%CI) | p-value |
| **Co-MNcog1 as mediator** |  |  |  |  |  |  |  |
| Wholefood diet | **Indirect** | **0.05 (0,0.12)** | **0.046** | ***0.05 (0, 0.13)*** | *0.068* | 0.05 (-0.02,0.14) | 0.2 |
|  | Direct | 0.32 (0,0.65) | 0.050 | 0.50 (0.14, 0.88) | 0.008 | 0.62 (0.17,1.11) | 0.008 |
|  | Total | 0.36 (0.04,0.70) | 0.036 | 0.55 (0.18, 0.94) | 0.004 | 0.67 (0.20, 1.15) | 0.004 |
|  | Proportion mediated = 12% | | | Proportion mediated=8% | | Proportion mediated = 6% | |
|  |  | | |  | |  | |
|  |  | | |  | |  | |
| Dietary inflammatory index | **Indirect** | **-0.03 (-0.07,0)** | **0.032** | *-0.03 (-0.07, 0)* | *0.054* | -0.02 (-0.07, 0.01) | 0.18 |
|  | Direct | -0.10 (-0.28,0.08) | 0.27 | -0.12 (-0.32, 0.08) | 0.24 | 0 (-0.25,0.26) | 0.98 |
|  | Total | -0.13 (-0.30, 0.05) | 0.15 | -0.15 (-0.35, 0.05) | 0.14 | -0.02 (-0.27, 0.24) | 0.85 |
|  | Proportion mediated = 17% | | | Proportion mediated 15% | | Proportion mediated = 4% | |
|  |  | | |  | |  | |
| Processed dietary pattern | Indirect | -0.05 (-0.15, 0.03) | 0.21 | -0.07 (-0.19, 0.03) | 0.17 | -0.046 (-0.17,0.04) | 0.35 |
|  | Direct | -0.36 (-0.7, -0.01) | 0.048 | -0.45 (-0.85, -0.05) | 0.026 | -0.71 (-1.2, -0.20) | 0.006 |
|  | Total | -0.42 (-0.77, -0.05) | 0.022 | -0.52 (-0.93, -0.09) | 0.014 | -0.76 (-1.26, -0.24) | 0.004 |

Note: Models were adjusted for socioeconomic adversity (lower maternal education and/or lower household income vs otherwise) PC 1 of genetic ancestry, dietary energy, mother’s age (less than 25 vs not), child’s gender assigned at birth, child’s post-conceptional age at time of Bayley-III testing, Bayley-III tester experience and passive tobacco smoking during pregnancy and total day of activity per week.

Note: Adjusting for pre-pregnancy BMI (kg/m2) did **NOT** significantly change these results.

#### Table S3. Interventional Effects of prenatal wholefood dietary pattern on children’s cognition (Bayley-III) through maternal GlycA (M1) at 28 weeks of gestation and Co-MNcog1 (M2) at cord blood.

| Effect | Β (95%CI) | P-value | Proportion mediated |
| --- | --- | --- | --- |
| Indirect effect through mediator 1  (M1: maternal GlycA) | 0.03 (-0.02, 0.09) | 0.210 | 5% |
| Indirect effect through mediator 2  (M2: Co-MNcog1) | *0.05 (-0.00,0.12)* | *0.054* | 9% |
| Direct effect | **0.44 (0.08, 0.81)** | **0.018** | - |
| Total effect | **0.52 (0.16, 0.88)** | **0.004** | - |

Note: Models were adjusted for socioeconomic adversity (based on maternal education and household income), PC1 of ancestry, dietary energy, mother’s age (less than 25 years vs not), child’s assigned sex at birth, child’s post-conceptional age at time of Bayley-III testing, Bayley-III tester experience. **Bold** values show p<0.05, *italics* show p<0.1.

#### Table S4. APrON Neurotox sub-sample characteristics .

|  | **Buffy coat blood subset**  **(n = 145)** | **BEC subset**  **(n = 240)** |
| --- | --- | --- |
| **Characteristic** | **N (%); M (SD, range)** | **N (%); M (SD, range)** |
| Maternal Characteristic |  |  |
| Maternal self-reported race |  |  |
| White | 131 (90.34%) | 207 (86.25%) |
| Non-White | 14 (9.66%) | 33 (13.75%) |
| Maternal parity |  |  |
| Primiparous | 80 (55.17%) | 143 (59.58%) |
| Multiparous | 65 (44.83%) | 97 (40.42%) |
| Maternal age (years) | 32.24 (4.08) | 31.94 (4.35) |
| Child Characteristic |  |  |
| Sex at birth |  |  |
| Female | 73 (50.34%) | 109 (45.42%) |
| Male | 72 (49.66%) | 131 (54.58%) |
| Gestational age at birth (weeks) | 39.41 (1.38) | 38.99 (1.83) |
| Birthweight (grams) | 3464 (499) | 3343 (551) |
| Infant age at biological sample collection (weeks) | 12.38 (1.31) | 13.07 (3.00) |
| Child age at Bayley-III (years) | 2.55 (0.13) | 2.53 (0.11) |

#### Table S5. Association between the Co-MNcog1 network and Bayley-III and parent reported outcomes at age 2 years in the APrON cohort.

| Bayley-III outcome | **Buffy coat blood subset**  β (95%CI) p value | **BEC subset**  β (95%CI) p value |
| --- | --- | --- |
| Cognitive compositea | 0.08 (-0.16, 0.32) 0.511 | 0.08 (-0.1, 0.25) 0.395 |
| Language compositea | -0.03 (-0.26, 0.21) 0.826 | -0.05 (-0.24, 0.14) 0.611 |
| Motor compositea | -0.19 (-0.43, 0.05) 0.116 | -0.07 (-0.27, 0.12) 0.454 |
| Cognitive scaleda | 0.02 (-0.03, 0.06) 0.497 | 0.02 (-0.02, 0.05) 0.399 |
| Receptive Communication scaleda | 0 (-0.04, 0.04) 0.874 | -0.01 (-0.04, 0.02) 0.622 |
| Expressive Communication scaleda | -0.02 (-0.06, 0.03) 0.525 | -0.01 (-0.05, 0.03) 0.77 |
| Fine Motor scaleda | -0.02 (-0.07, 0.02) 0.268 | -0.02 (-0.06, 0.01) 0.138 |
| Gross Motor scaleda | -0.03 (-0.09, 0.02) 0.263 | 0 (-0.05, 0.04) 0.937 |
| Social-Emotional compositeb | -0.06 (-0.3, 0.17) 0.587 | **-0.21 (-0.38, -0.04) 0.015** |
| General Adaptive compositeb | -0.09 (-0.32, 0.14) 0.438 | -0.02 (-0.19, 0.15) 0.83 |
| Social-Emotional scaledb | -0.01 (-0.06, 0.03) 0.608 | **-0.04 (-0.08, -0.01) 0.013** |
| Communication scaledb | 0 (-0.04, 0.04) 0.96 | -0.02 (-0.05, 0.01) 0.206 |
| Community Use scaledb | -0.01 (-0.06, 0.03) 0.482 | -0.01 (-0.04, 0.02) 0.61 |
| Functional Pre-academics scaledb | -0.01 (-0.06, 0.03) 0.586 | 0.01 (-0.03, 0.04) 0.731 |
| Home Living scaledb | -0.01 (-0.05, 0.04) 0.714 | 0.01 (-0.02, 0.04) 0.549 |
| Health and Safety scaledb | -0.03 (-0.08, 0.02) 0.195 | -0.02 (-0.06, 0.01) 0.222 |
| Leisure scaledb | 0 (-0.05, 0.05) 0.941 | -0.03 (-0.06, 0.01) 0.121 |
| Self-Care scaledb | -0.01 (-0.05, 0.02) 0.424 | 0.01 (-0.02, 0.04) 0.557 |
| Self-Direction scaledb | -0.02 (-0.07, 0.03) 0.459 | -0.01 (-0.05, 0.02) 0.505 |
| Social scaledb | -0.01 (-0.05, 0.04) 0.726 | 0.01 (-0.03, 0.04) 0.767 |
| Motor scaledb | *-0.04 (-0.09, 0.01) 0.099* | 0.03 (-0.01, 0.07) 0.13 |

Linear regression adjusted for child’s age at assessment and assigned sex at birth.

aThe performance-based metrics of the Bayley-III were available for the entire subsets (i.e., n = 145 and n= 240 for the buffy coat blood and BEC subsets, respectively)

bThe parent-report metrics from the Bayley-III Social-Emotional and Adaptive Behavior Questionnaire were available for n = 130 from the buffy coat blood subset and n= 215 from the BEC subset
